# Supplementary material for: MicroRNA93 Regulates Proliferation and Differentiation of Normal and Malignant Breast Stem Cells
Source: PLoS Genet. 2012 Jun 7;8(6):e1002751. doi: 10.1371/journal.pgen.1002751 (PMC3369932; doi:10.1371/journal.pgen.1002751)
Supplement: Figure S13 — mir93 promotes tumor growth by increasing CSCs in T47D cells. A. 500k pTRIPZ-T47D-mir93 cells were injected into the 4th fatpads of NOD/SCID mice. Treatment was initiated as indicated by the red arrow. DOX (1 mg/ml in drinking water) promoted T47D tumor growth in vivo. B. Tumors from each group were collected. Aldefluor assay was performed on dissociated cells. DOX increased the ALDH+ populations in T47D. C. Serial dilutions of cells obtained from these xenografts were implanted in the 4th fatpads of secondary mice, which received no further treatment. Cells from DOX-treated tumors formed secondary tumors at all dilutions (5k, 50k, 500k). *p<0.05; Error bars represent mean ± STDEV. (PDF) [file pgen.1002751.s013.pdf]

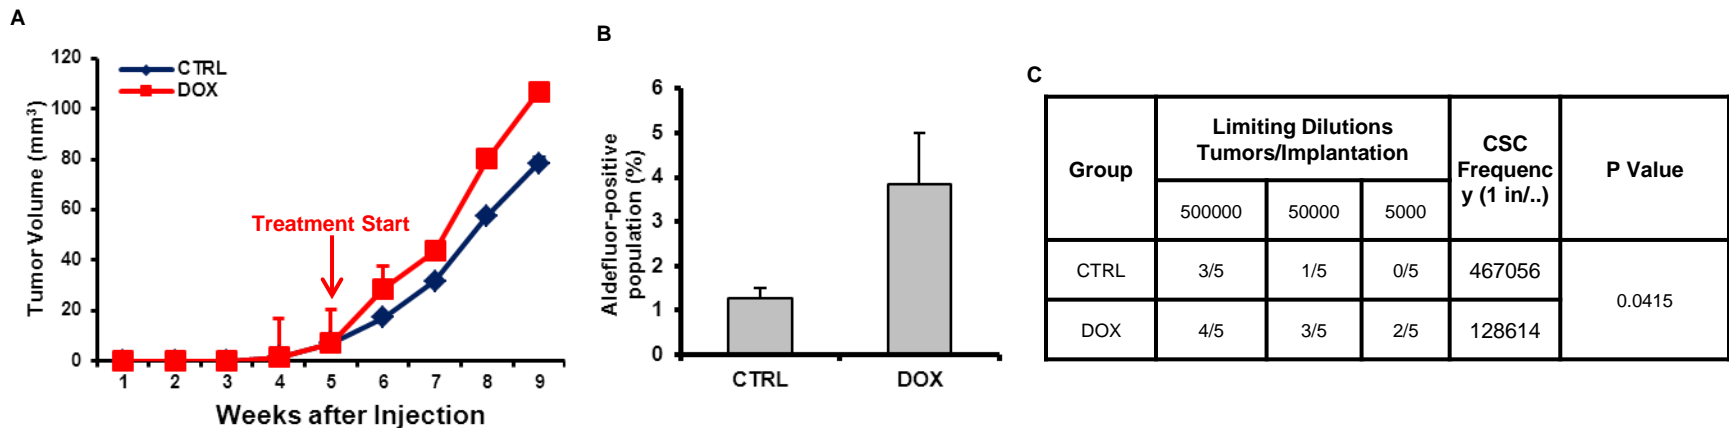

**Figure S13. mir93 promotes tumor growth by increasing CSCs in T47D cells**

**A.** 500k pTRIPZ-T47D-mir93 cells were injected into the 4<sup>th</sup> fatpads of NOD/SCID mice. Treatment was initiated as indicated by the red arrow. DOX (1mg/ml in drinking water) promoted T47D tumor growth in vivo. **B.** Tumors from each group were collected. Aldefluor assay was performed on dissociated cells. DOX increased the ALDH<sup>+</sup> populations in T47D. **C.** Serial dilutions of cells obtained from these xenografts were implanted in the 4<sup>th</sup> fatpads of secondary mice, which received no further treatment. Cells from DOX-treated tumors formed secondary tumors at all dilutions (5k, 50k, 500k). \*p<0.05; Error bars represent mean ± STDEV.
