# Supplementary material for: MicroRNA93 Regulates Proliferation and Differentiation of Normal and Malignant Breast Stem Cells
Source: PubMed Central journal article supplement (PMC3369932; doi:10.1371/journal.pgen.1002751), 2012-06-07
Supplement: pgen.1002751.s001.pdf [file pgen.1002751.s001.pdf]

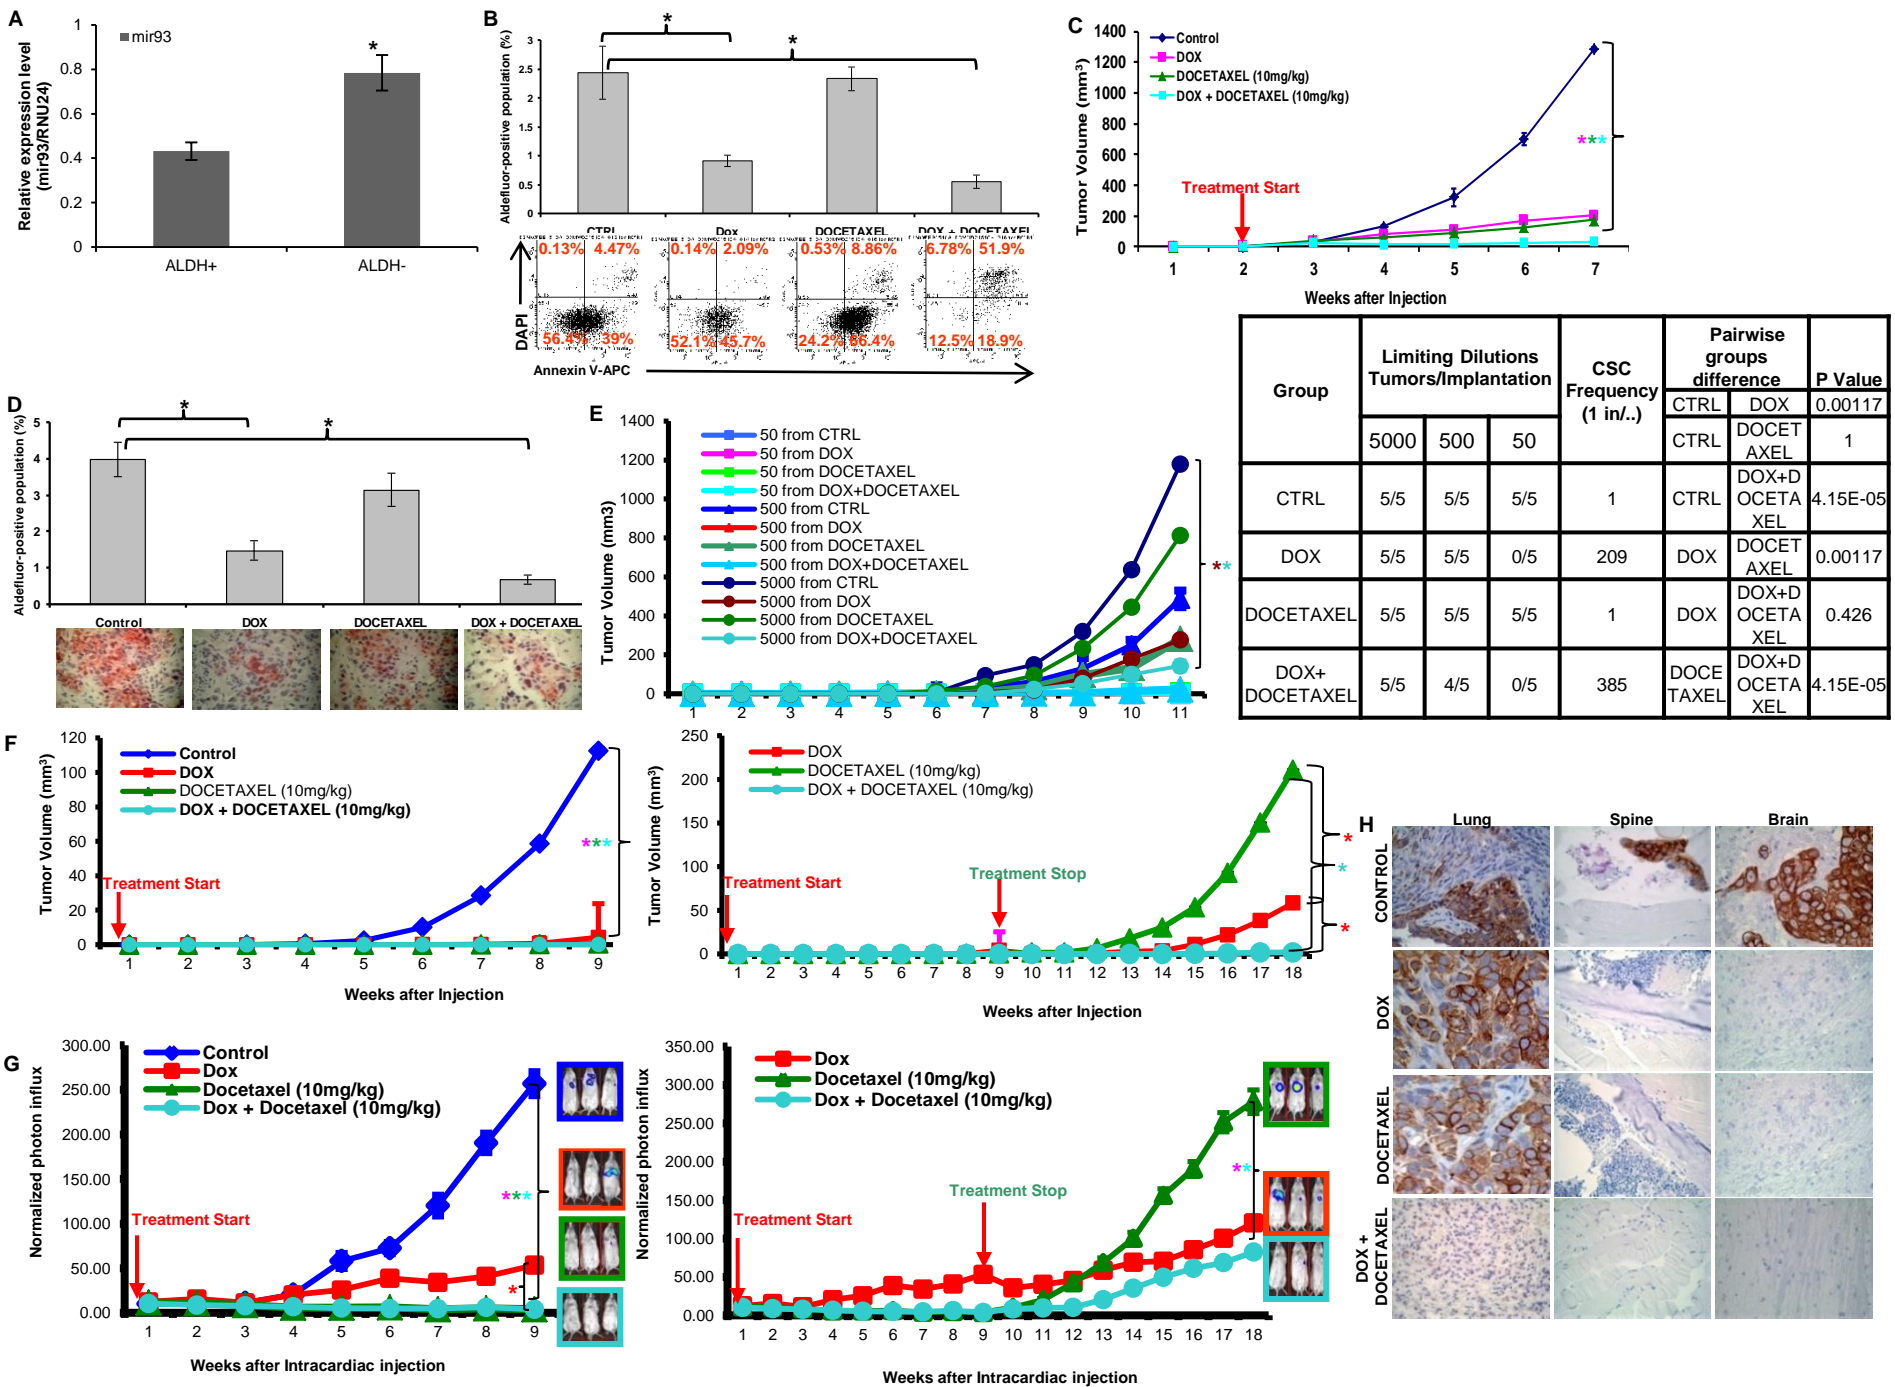

**Figure S1. mir93 inhibits tumor growth and metastasis by decreasing CSCs in HCC1954 cells**

**A.** ALDH-positive cells from HCC1954 cells shows lower mir93 expression level in comparison to ALDH-negative cells by qRT-PCR. **B.**  $1 \times 10^6$  pTRIPZ-HCC1954-mir93 cells were plated in T75 flasks and, after overnight, the cells were treated with Vehicle control, DOX (1ug/ml), docetaxel (10 nM) or the combination for 3-7days. Cells were utilized for Aldefluor assay and stained for Annexin V-APC and DAPI for apoptosis assay. **C.** 100k pTRIPZ-HCC1954-mir93 cells were injected into the 4<sup>th</sup> fatpads of NOD/SCID mice. The treatment started as indicated by the red arrow. DOX alone (1mg/ml in drinking water), or docetaxel (10 mg/kg i.p. once weekly) alone, or the combination inhibits SUM159 tumor growth in vivo. **D.** Tumors from each group were collected. ALDH was accessed by the Aldefluor assay on viable dissociated cells and by ALDH1 immunohistochemistry on fixed sections. **E.** Serial dilutions of cells obtained from these xenografts were implanted in the 4<sup>th</sup> fatpads of secondary mice, which received no further treatment. **F.** 10k pTRIPZ-HCC1954-mir93 cells were injected into the 4<sup>th</sup> fatpads of NOD/SCID mice. The treatment started immediately after injection as indicated by the red arrow and stopped as indicated by the green arrow. **G.** 200k pTRIPZ-HCC1954-mir93-luc cells in 100ul of PBS were injected into the left ventricle of NOD/SCID mice. The treatment started immediately after injection as indicated by the red arrow and stopped as indicated by the green arrow. Metastasis formation was monitored using bioluminescence imaging. Quantification of the normalized photon flux, measured at weekly intervals following inoculation. **H.** Histologic confirmation, by H&E staining, of metastasis in soft tissues resulting from mice with different treatments in **G.**

\* $p < 0.05$ ; Error bars represent mean  $\pm$  STDEV. The colored “\*” on the side of the tumor growth or metastasis curve represents the tumor growth is significantly different between Control group and the group with the same colored curve.
