# Supplementary material for: MicroRNA93 Regulates Proliferation and Differentiation of Normal and Malignant Breast Stem Cells
Source: PubMed Central journal article supplement (PMC3369932; doi:10.1371/journal.pgen.1002751), 2012-06-07
Supplement: pgen.1002751.s003.pdf [file pgen.1002751.s003.pdf]

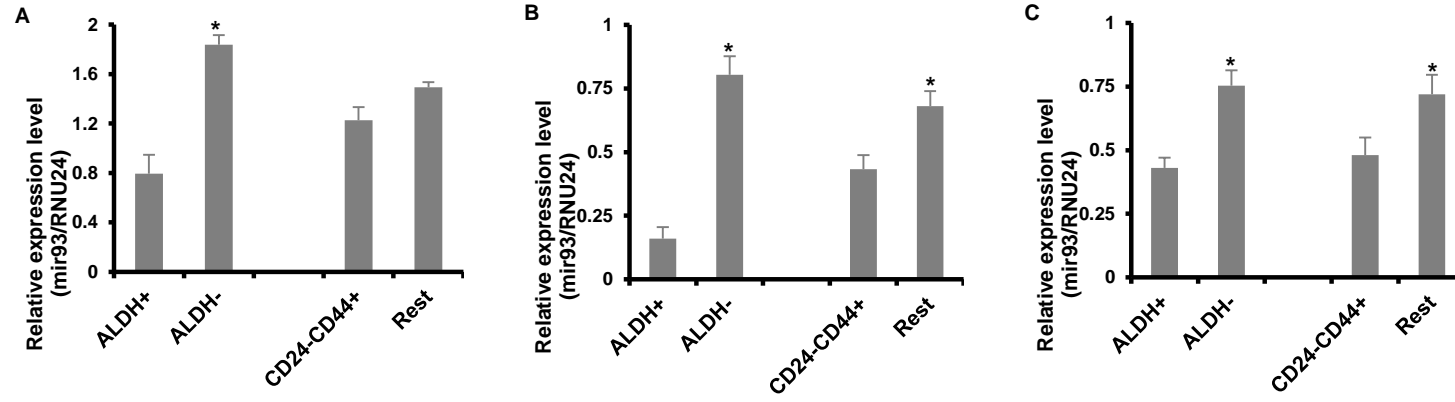

**Figure S3. Induction of mir93 decreases both ALDH<sup>+</sup> and CD24<sup>-</sup>CD44<sup>+</sup> cells in the primary breast tumor xenografts.** Cells isolated from primary human breast xenografts UM2 (**A**), MC1 (**B**) and UM1 (**C**) were sorted for ALDH<sup>+</sup> and ALDH<sup>-</sup> or CD24<sup>-</sup>CD44<sup>+</sup> and the rest (CD24<sup>-</sup>CD44<sup>-</sup>, CD24<sup>+</sup>CD44<sup>+</sup>, CD24<sup>+</sup>CD44<sup>-</sup>). RNA was isolated from each group of sorted cells and the expression level of mir-93 or RNU24 level was measured by qRT-PCR. \* $p < 0.05$ ; Error bars represent mean  $\pm$  STDEV.
