# Supplementary material for: MicroRNA93 Regulates Proliferation and Differentiation of Normal and Malignant Breast Stem Cells
Source: PubMed Central journal article supplement (PMC3369932; doi:10.1371/journal.pgen.1002751), 2012-06-07
Supplement: pgen.1002751.s005.pdf [file pgen.1002751.s005.pdf]

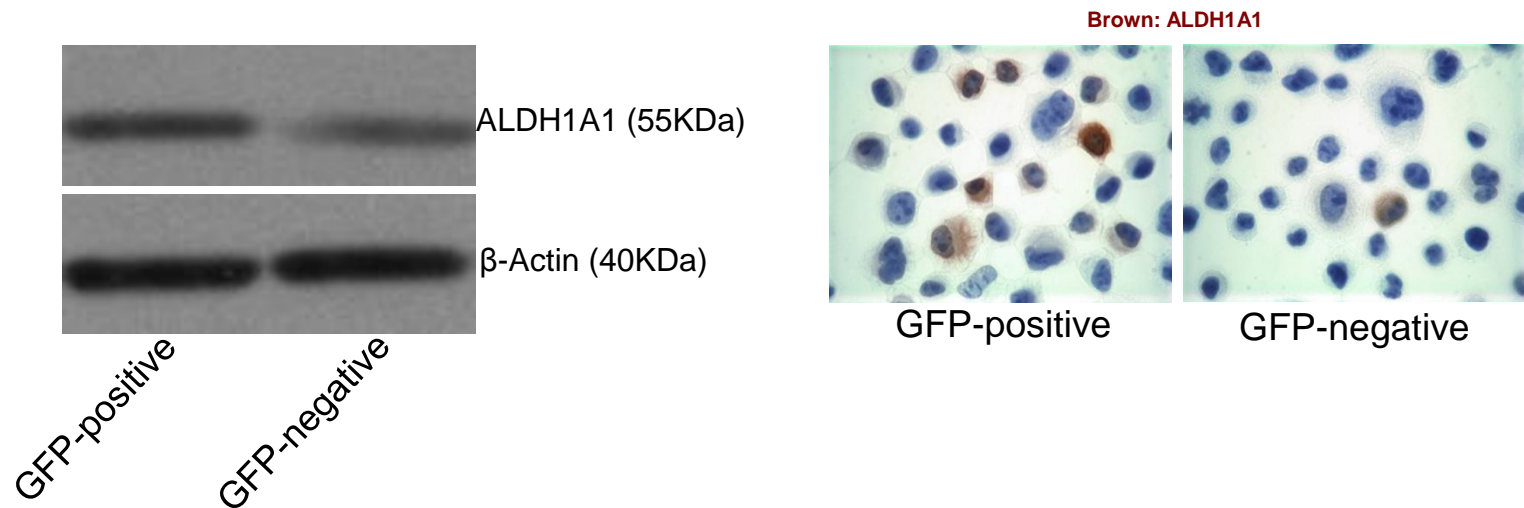

**Figure S5. ALDH1A1 protein level in Sensor-GFP-positive and Sensor-GFP-negative SUM159 cells.**

mir-93-sensor-GFP SUM159 cells were sorted for GFP-positive and GFP-negative cells by flow cytometry. A portion of cells were utilized for western blot, and some cells were cytopun down and stained with ALDH1A1 by immunohistochemical staining. \* $p < 0.05$ ; Error bars represent mean  $\pm$  STDEV.
