# Supplementary material for: MicroRNA93 Regulates Proliferation and Differentiation of Normal and Malignant Breast Stem Cells
Source: PubMed Central journal article supplement (PMC3369932; doi:10.1371/journal.pgen.1002751), 2012-06-07
Supplement: pgen.1002751.s006.pdf [file pgen.1002751.s006.pdf]

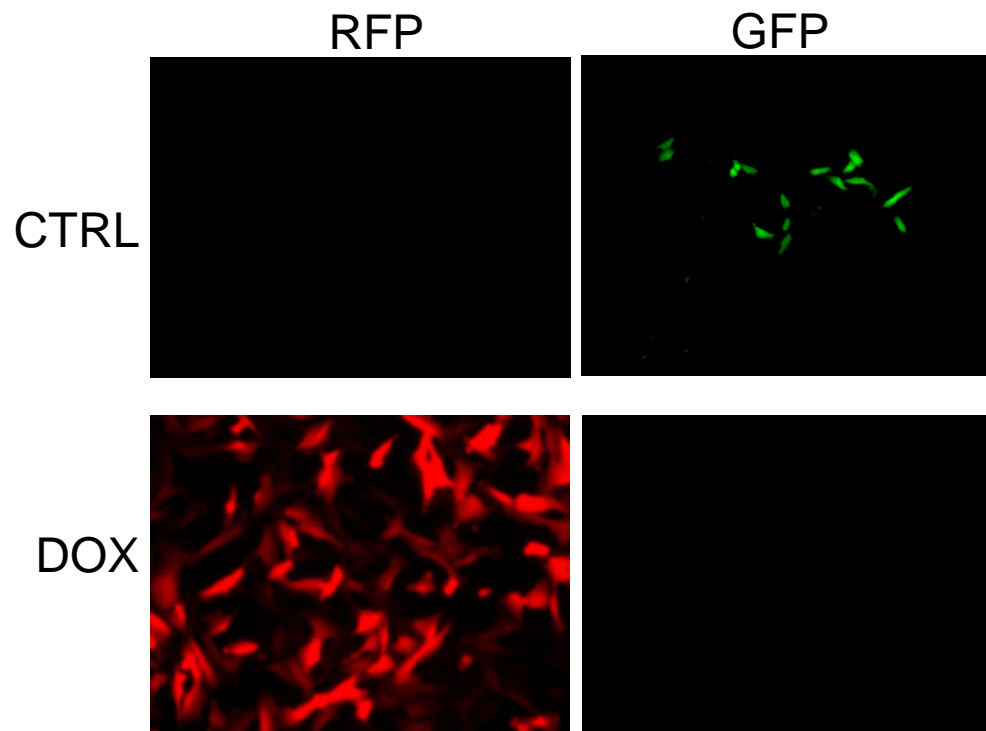

**Figure S6. mir-93 induction reduces GFP in mir93-sensor-GFP-SUM159 cells.**

mir93-sensor-GFP-SUM159 cells were infected with pTRIPZ-mir93 lentivirus and grow in T75 flasks. DOX were added to the culture medium in the DOX group. Images were taken with fluorescence microscope.
