# Supplementary material for: MicroRNA93 Regulates Proliferation and Differentiation of Normal and Malignant Breast Stem Cells
Source: PubMed Central journal article supplement (PMC3369932; doi:10.1371/journal.pgen.1002751), 2012-06-07
Supplement: pgen.1002751.s007.pdf [file pgen.1002751.s007.pdf]

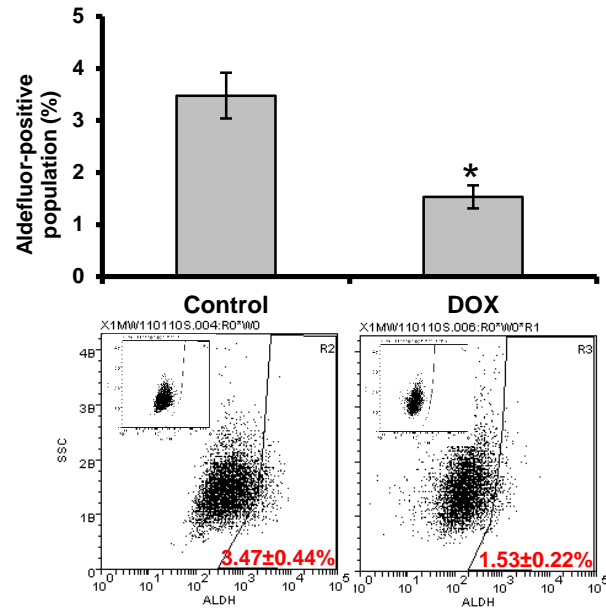

**Figure S7.**  $1 \times 10^6$  pTRIPZ-SUM149-mir93 cells were plated in T75 flasks and, after overnight, the cells were treated with Vehicle control or DOX (1ug/ml) for 3-7days. Induction of mir93 expression by DOX decreased the ALDH-positive population. \* $p < 0.05$ ; Error bars represent mean  $\pm$  STDEV.
