# Supplementary material for: MicroRNA93 Regulates Proliferation and Differentiation of Normal and Malignant Breast Stem Cells
Source: PubMed Central journal article supplement (PMC3369932; doi:10.1371/journal.pgen.1002751), 2012-06-07
Supplement: pgen.1002751.s010.pdf [file pgen.1002751.s010.pdf]

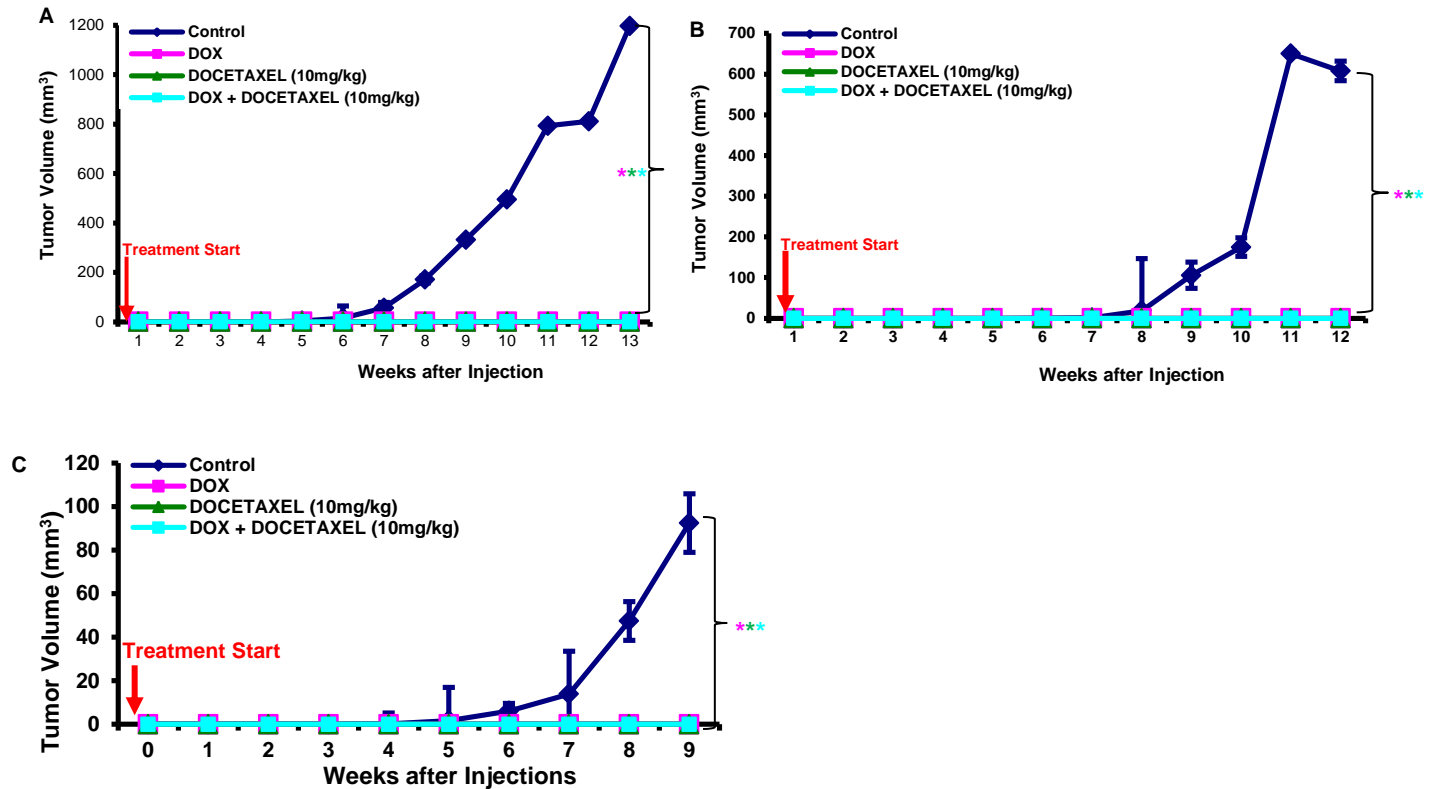

**Figure S10. mir3c inhibits tumor growth in primary human breast xenografts MC1, UM2 and UM1**

Cells isolated from primary xenografts MC1 (A) or UM2 (B) or UM1 (C) were transduced with the pTRIPZ-mir3c lentivirus in suspension. 10k pTRIPZ-MC1-mir3c or pTRIPZ-UM2-mir3c cells were injected into the 4<sup>th</sup> fatpads of NOD/SCID mice. The treatment started right after injection as indicated by the red arrow. DOX alone, docetaxel alone or the combination prevented tumor growth. \* $p < 0.05$ ; Error bars represent mean  $\pm$  STDEV. The colored “\*” on the side of the tumor growth curve represents the tumor growth is significantly different between Control group and the group with the same colored curve.
