# Supplementary material for: MicroRNA93 Regulates Proliferation and Differentiation of Normal and Malignant Breast Stem Cells
Source: PubMed Central journal article supplement (PMC3369932; doi:10.1371/journal.pgen.1002751), 2012-06-07
Supplement: pgen.1002751.s011.pdf [file pgen.1002751.s011.pdf]

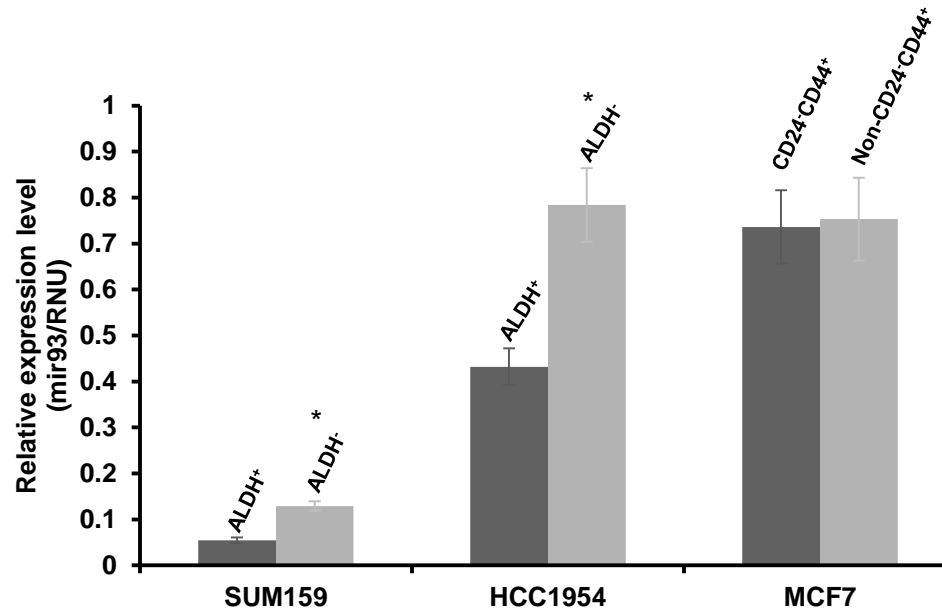

**Figure S11. Endogenous mir93 expression levels parallel cell differentiation state**

ALDH<sup>+</sup> population and ALDH<sup>-</sup> population were separated from SUM159 cells and HCC1954 cells. CD24<sup>-</sup>CD44<sup>+</sup> population and the remaining cell populations were separated from MCF7 cells. mir93 level was analyzed by microRNA qRT-PCR. Among these three cell lines, mir93 expression level is highest in MCF7 cells and lowest in the SM159 cells. In both SUM159 cells and HCC1954 cells, ALDH<sup>+</sup> cells have lower mir93 expression compared to ALDH<sup>-</sup> cells. In contrast, CD24<sup>-</sup>CD44<sup>+</sup> in MCF7 cells showed no difference for mir93 expression level in comparison to the bulk population.

\* $p < 0.05$ ; Error bars represent mean  $\pm$  STDEV.
