# Supplementary material for: MicroRNA93 Regulates Proliferation and Differentiation of Normal and Malignant Breast Stem Cells
Source: PubMed Central journal article supplement (PMC3369932; doi:10.1371/journal.pgen.1002751), 2012-06-07
Supplement: pgen.1002751.s012.pdf [file pgen.1002751.s012.pdf]

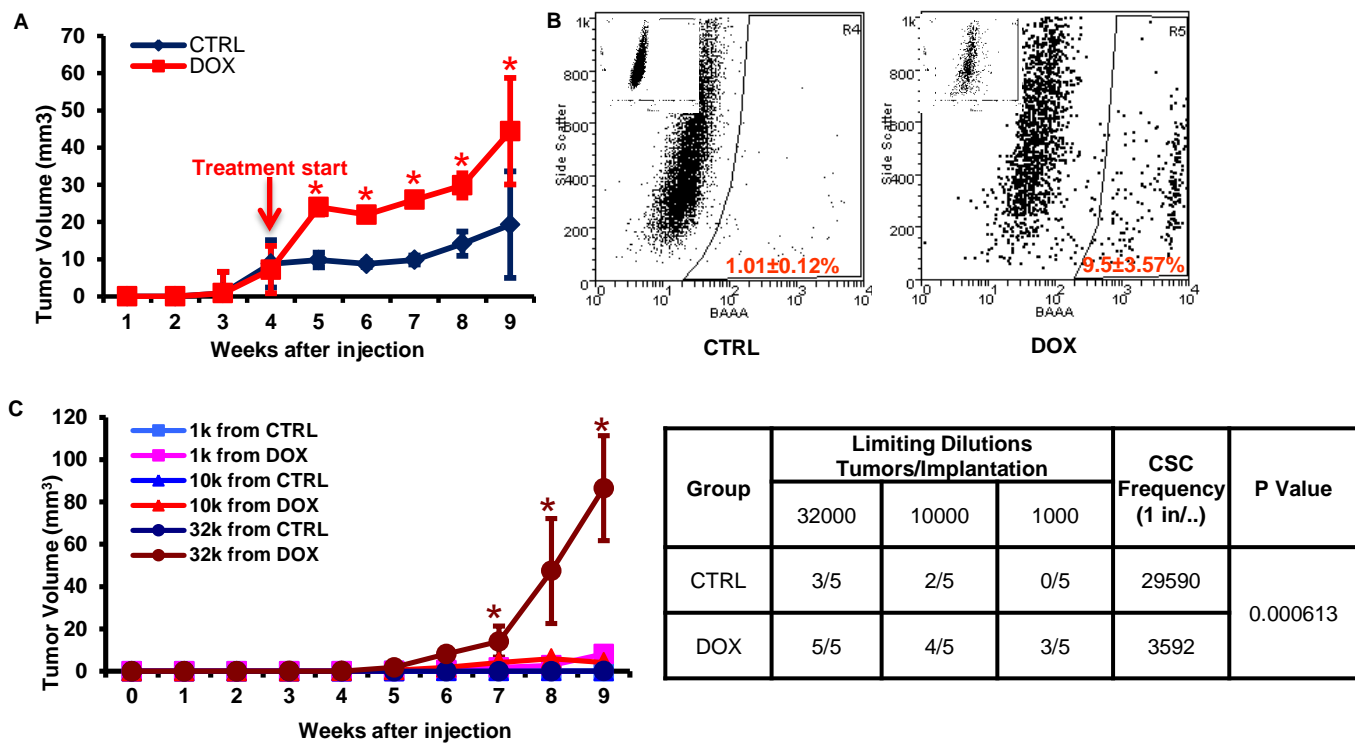

**Figure S12. mir93 promotes tumor growth by increasing CSCs in MDA-MB-453 cells**

**A.** 200k pTRIPZ-MDA-MB-453-mir93 cells were injected into the 4<sup>th</sup> fatpads of NOD/SCID mice. Treatment was initiated as indicated by the red arrow. DOX (1mg/ml in drinking water) promoted MDA-MB-453 tumor growth in vivo. **B.** Tumors from each group were collected. Aldefluor assay was performed on dissociated cells. DOX increased the ALDH<sup>+</sup> populations in MDA-MB-453. **C.** Serial dilutions of cells obtained from these xenografts were implanted in the 4<sup>th</sup> fatpads of secondary mice, which received no further treatment. Cells from DOX-treated tumors formed secondary tumors at all dilutions (1k, 10k, 32k), whereas only higher numbers of cells (32k) obtained from control xenografts were able to generate tumors. \*p<0.05; Error bars represent mean ± STDEV.
