# Supplementary material for: MicroRNA93 Regulates Proliferation and Differentiation of Normal and Malignant Breast Stem Cells
Source: PubMed Central journal article supplement (PMC3369932; doi:10.1371/journal.pgen.1002751), 2012-06-07
Supplement: pgen.1002751.s015.pdf [file pgen.1002751.s015.pdf]

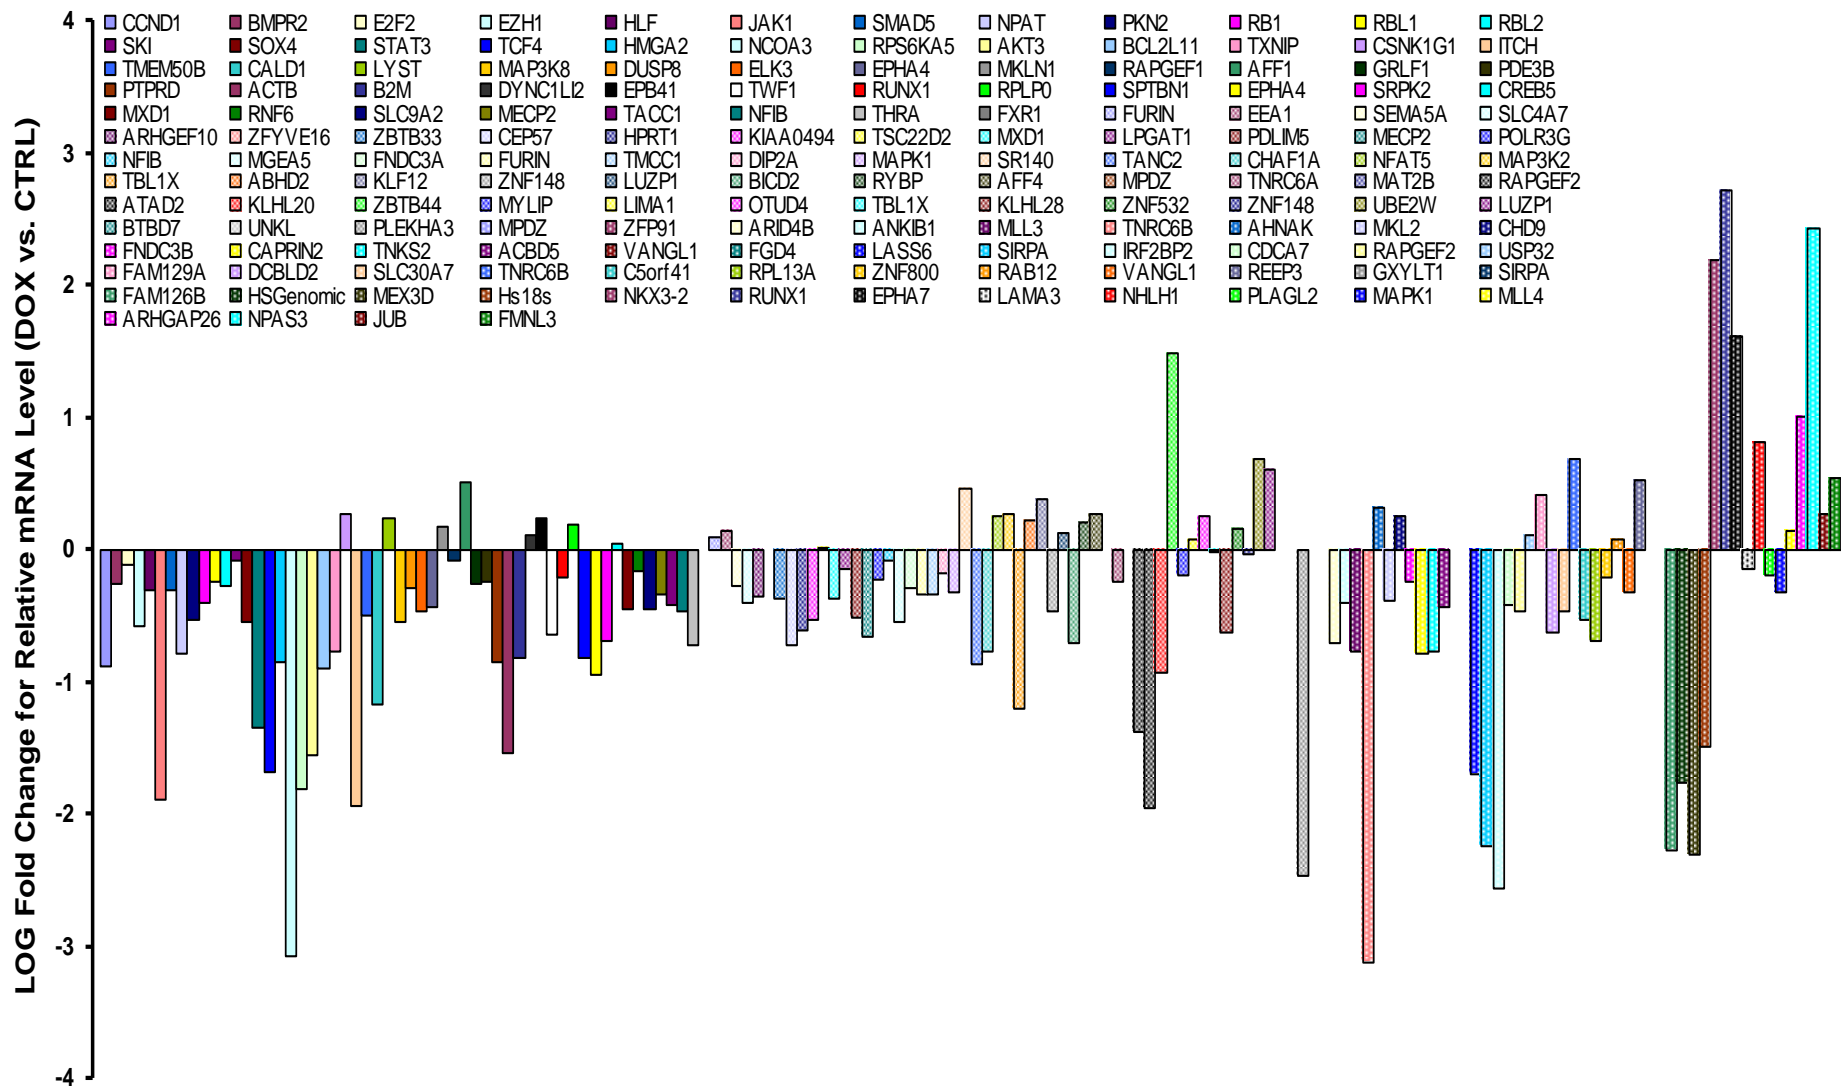

Figure S15. Validation of the 127 overlapped gene expression with customized StellArray PCR array plate in pTRIPZ-SUM159-mir93.
