# Supplementary material for: MicroRNA93 Regulates Proliferation and Differentiation of Normal and Malignant Breast Stem Cells
Source: PubMed Central journal article supplement (PMC3369932; doi:10.1371/journal.pgen.1002751), 2012-06-07
Supplement: pgen.1002751.s020.pdf [file pgen.1002751.s020.pdf]

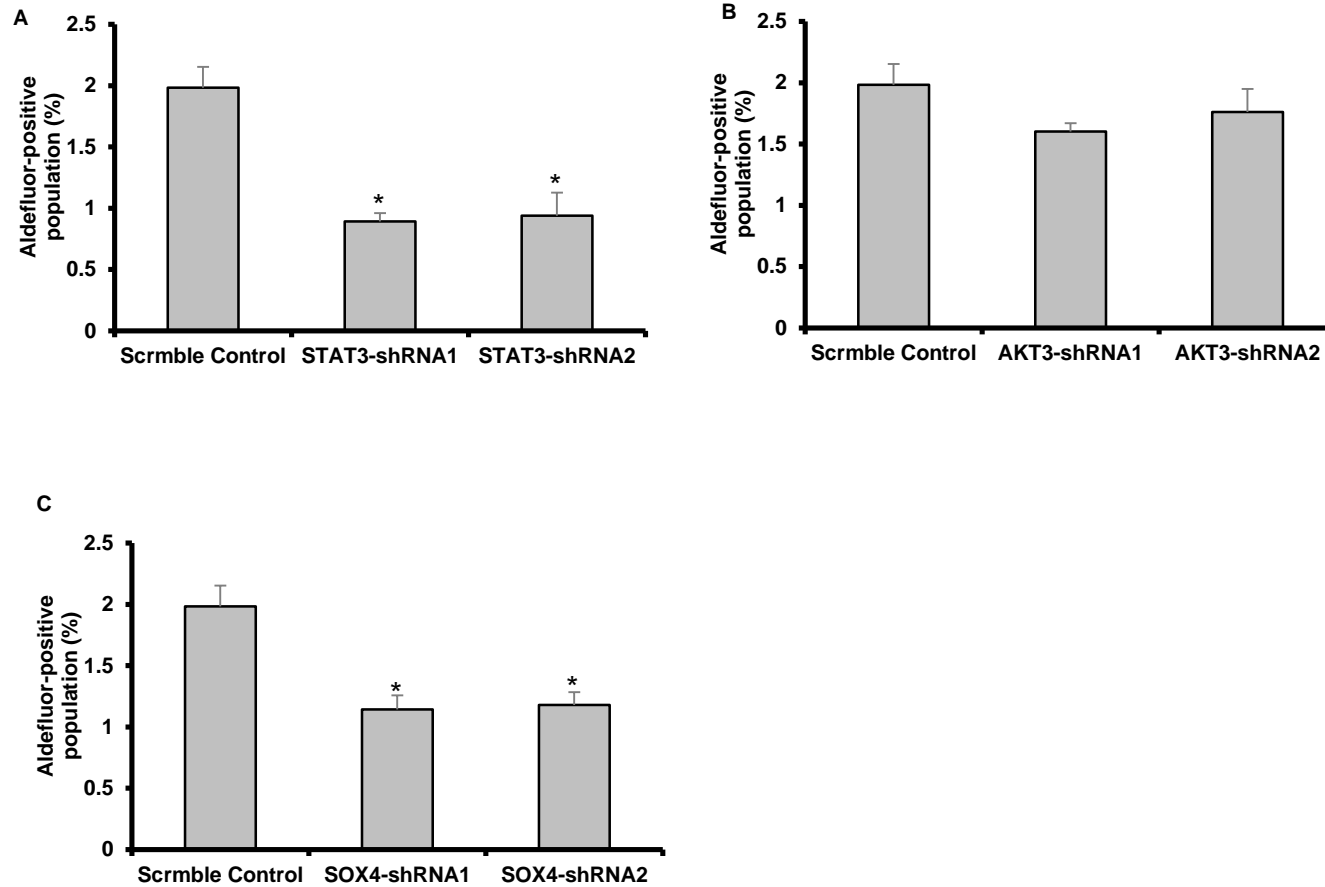

**Figure S20. Knockdown of STAT3 (A), AKT3 (B) or SOX4 (C) decreases ALDH<sup>+</sup> cells in SUM159 cells.**

SUM159 cells were transfected with PlentiLox3.7-shRNA-DsRed viruses and accessed for the ALDH<sup>+</sup> population by Aldefluor assay. \* $p < 0.05$ ; Error bars represent mean  $\pm$  STDEV.
