# Supplementary material for: MicroRNA93 Regulates Proliferation and Differentiation of Normal and Malignant Breast Stem Cells
Source: PubMed Central journal article supplement (PMC3369932; doi:10.1371/journal.pgen.1002751), 2012-06-07
Supplement: pgen.1002751.s022.pdf [file pgen.1002751.s022.pdf]

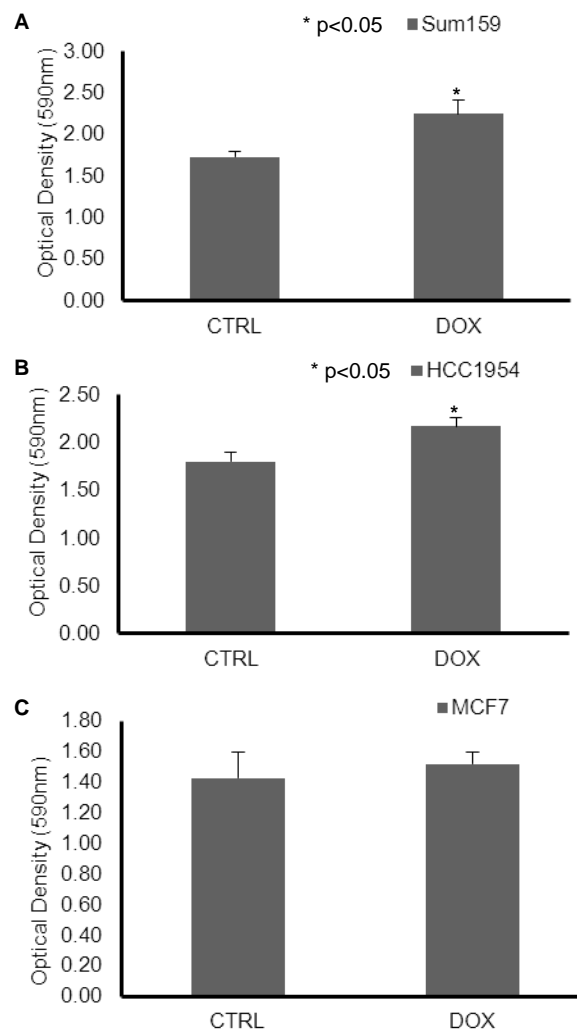

**Figure S22. The effects of mir93 on cell proliferation**

Cell proliferation was measured with the MTT assay. 200-500 cells from Control and DOX-treated groups were seeded in 96-well culture plates and were cultured in the absence (CTRL) and presence (DOX) of DOX for 7days. Data represents means SEM,  $n = 5$ . \*p<0.05; Error bars represent mean  $\pm$  STDEV.
