# Supplementary material for: MicroRNA93 Regulates Proliferation and Differentiation of Normal and Malignant Breast Stem Cells
Source: PubMed Central journal article supplement (PMC3369932; doi:10.1371/journal.pgen.1002751), 2012-06-07
Supplement: pgen.1002751.s025.pdf [file pgen.1002751.s025.pdf]

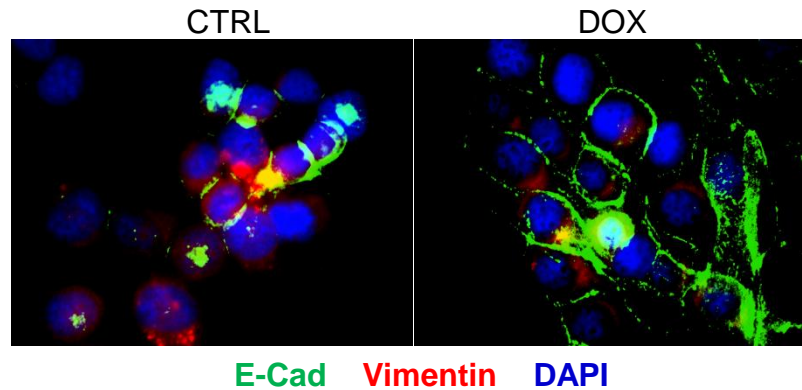

**Figure S25. Mir93 expression induces MET in HCC1954 cells**

pTRIPZ-HCC1954-mir93 cells were plated in 2-well chamber slides with (DOX) or without (CTRL) Doxycycline for 7 days. E-Cadherin and Vimentin were stained with immunofluorescence staining. E-Cadherin, Green; Vimentin, Red; DAPI, Blue. One representative sample from 3 independent samples are shown.
