# Supplementary material for: MicroRNA93 Regulates Proliferation and Differentiation of Normal and Malignant Breast Stem Cells
Source: PubMed Central journal article supplement (PMC3369932; doi:10.1371/journal.pgen.1002751), 2012-06-07
Supplement: pgen.1002751.s026.pdf [file pgen.1002751.s026.pdf]

**Downregulated probe set in ALDH+ DOX vs. CTRL**

| Probe                   | Symbol       | GenBank              | Gene      | UniGene              | Fold Change  | DOX ALDH+   | CTRL ALDH+  |
|-------------------------|--------------|----------------------|-----------|----------------------|--------------|-------------|-------------|
| 230180_at               |              | AA521056             |           |                      | -3.800545149 | 4.040523376 | 7.841068525 |
| 230397_at               |              | AI383996             |           |                      | -3.628527599 | 4.954934924 | 8.583462523 |
| 208003_s_at             | NFAT5        | NM_006599            | 10725     | Hs.371987            | -3.453179054 | 4.706805486 | 8.159984539 |
| 209136_s_at             | USP10        | BG390445             | 9100      | Hs.136778            | -3.450490456 | 7.496398092 | 10.94688855 |
| 207276_at               | CDR1         | NM_004065            | 1038      | Hs.446675            | -3.405377326 | 8.179748067 | 11.58512539 |
| 210172_at               | SF1          | D26121               | 7536      | Hs.502829, Hs.708209 | -3.362259025 | 4.734388958 | 8.096647983 |
| 231873_at               | BMPR2        | AL046696             | 659       | Hs.471119            | -3.317845656 | 4.685527121 | 8.003372777 |
| 1564378_a_at            |              | AK025101             |           |                      | -3.301967938 | 3.906932914 | 7.208900852 |
| 240263_at               |              | N74924               |           |                      | -3.289312999 | 3.223136282 | 6.512449281 |
| 238353_at               | RASL11A      | AW450584             | 387496    | Hs.192131            | -3.243042393 | 4.278211001 | 7.521253394 |
| AFFX-HUMRGE/M10098_5_at |              | AFFX-HUMRGE/M10098_5 |           |                      | -3.239422989 | 7.347671939 | 10.58709493 |
| 207210_at               | GABRA3       | NM_000808            | 2556      | Hs.123024            | -3.216881477 | 4.684067062 | 7.900948539 |
| 1563947_a_at            | ERC1         | AK097177             | 23085     | Hs.655744, Hs.658200 | -3.214398339 | 4.926804296 | 8.141202635 |
| 215606_s_at             | ERC1         | AB029004             | 23085     | Hs.655744, Hs.658200 | -3.197952434 | 5.05872826  | 8.256680694 |
| 239571_at               |              | AI123399             |           |                      | -3.153697805 | 3.38958671  | 6.543284515 |
| 244006_at               | POU2F1       | BF238986             | 5451      | Hs.493649            | -3.150757717 | 3.29607295  | 6.446830666 |
| 241621_at               | SMCHD1       | AW974517             | 23347     | Hs.8118              | -3.134848238 | 3.454555405 | 6.589403643 |
| 244414_at               |              | AI148006             |           |                      | -3.115771068 | 3.958590652 | 7.07436172  |
| 238831_at               | TMEM33       | BF114679             | 55161     | Hs.31082             | -3.109304896 | 7.860136421 | 10.96944132 |
| 220342_x_at             | EDEM3        | NM_017992            | 80267     | Hs.523811            | -3.082835634 | 5.998727433 | 9.081563067 |
| 244181_at               |              | AA018968             |           |                      | -3.07666723  | 4.834306461 | 7.910973691 |
| 235281_x_at             | AHNAK        | AA523289             | 79026     | Hs.502756            | -3.028139266 | 5.960112458 | 8.988251723 |
| 201299_s_at             | MOBK1B       | NM_018221            | 55233     | Hs.196437            | -3.007700923 | 7.076772675 | 10.0844736  |
| 216361_s_at             | MYST3        | AJ251844             | 7994      | Hs.491577            | -3.006764468 | 5.473928961 | 8.480693429 |
| 243435_at               | KCNQ1OT1     | AI023707             | 10984     | Hs.647285, Hs.655148 | -2.988294992 | 4.957847818 | 7.94614281  |
| 241320_at               |              | AI821449             |           |                      | -2.982535395 | 4.100170589 | 7.082705984 |
| 209754_s_at             | TMPO         | AF113682             | 7112      | Hs.11355             | -2.974942803 | 4.528558339 | 7.503501142 |
| 229403_at               | B4GALT1      | AI572046             | 2683      | Hs.272011            | -2.9662584   | 3.956256893 | 6.922515293 |
| 1564430_at              |              | BC007549             |           |                      | 2.965155303  | 7.895941085 | 4.930785782 |
| 1558747_at              | SMCHD1       | AA336502             | 23347     | Hs.8118              | -2.960709638 | 7.072827428 | 10.03353707 |
| 231719_at               | IFRG15       | NM_022347            | 64163     | Hs.655655, Hs.716051 | -2.952408014 | 5.189739934 | 8.142147947 |
| 241245_at               | SFRS4        | AV647470             | 6429      | Hs.469970            | -2.949788389 | 4.99619032  | 7.945978709 |
| 1559485_at              | ATG2B        | BC015851             | 55102     | Hs.168241            | -2.946000209 | 5.06653389  | 8.0125341   |
| 203354_s_at             | PSD3         | AW117368             | 23362     | Hs.434255            | -2.941252911 | 7.068742809 | 10.00999572 |
| 243455_at               |              | AW207738             |           |                      | -2.939783165 | 5.268983097 | 8.208766263 |
| 213286_at               | ZFR          | BF445199             | 51663     | Hs.435231            | -2.93052493  | 7.560701396 | 10.49122633 |
| 235060_at               | LOC100190981 | AL047052             | 100190986 | Hs.611072, Hs.648439 | -2.924751916 | 3.233686108 | 6.158438024 |
| 229694_at               | BRWD2        | BF062828             | 55717     | Hs.144447            | -2.92082807  | 4.787112424 | 7.707940493 |
| 221419_s_at             |              | NM_013307            |           |                      | -2.907199521 | 7.56468149  | 10.47188101 |
| 206708_at               | FOXN2        | NM_002158            | 3344      | Hs.468478            | -2.905942439 | 4.747322798 | 7.653265237 |
| 1565886_at              |              | W04694               |           |                      | -2.902452987 | 3.447398013 | 6.349851001 |

|              |              |           |           |                      |              |             |             |
|--------------|--------------|-----------|-----------|----------------------|--------------|-------------|-------------|
| 230036_at    | SAMD9L       | BE669858  | 219285    | Hs.489118            | 2.899548418  | 9.004680577 | 6.105132158 |
| 216555_at    | C22orf30     | AK026712  | 253143    | Hs.438906            | -2.89208436  | 6.467566358 | 9.359650718 |
| 204114_at    | NID2         | NM_007361 | 22795     | Hs.369840            | 2.857889671  | 8.826778953 | 5.968889282 |
| 241403_at    | CLK4         | AA468591  | 57396     | Hs.406557            | -2.855448894 | 3.953627255 | 6.809076149 |
| 1563560_at   | AHNAK        | M80899    | 79026     | Hs.502756            | -2.846702815 | 6.228329799 | 9.075032614 |
| 1556348_at   | HEATR1       | AK095692  | 55127     | Hs.708114            | -2.829347959 | 4.536522776 | 7.365870736 |
| 1568846_at   |              | BC017718  |           |                      | -2.825793847 | 6.9335621   | 9.759355947 |
| 242471_at    |              | AI916641  |           |                      | -2.818154383 | 4.104838744 | 6.922993127 |
| 214673_s_at  | HUWE1        | AU140931  | 10075     | Hs.136905            | -2.817469003 | 4.95390653  | 7.771375533 |
| 224771_at    | NAV1         | AI937060  | 89796     | Hs.585374            | -2.817369193 | 7.536676224 | 10.35404542 |
| 33148_at     | ZFR          | AI459274  | 51663     | Hs.435231            | -2.813735265 | 8.040686292 | 10.85442156 |
| 230028_at    | KIAA0907     | BF508843  | 22889     | Hs.719258            | -2.805656533 | 3.984890753 | 6.790547286 |
| 203056_s_at  | PRDM2        | AI681013  | 7799      | Hs.371823            | -2.805446695 | 7.906971986 | 10.71241868 |
| 231005_at    |              | T91195    |           |                      | -2.801569509 | 4.188217288 | 6.989786796 |
| 232021_at    | GLT8D3       | AI864273  | 283464    | Hs.259347            | -2.79868894  | 3.901938602 | 6.700627541 |
| 221753_at    | SSH1         | AI651213  | 54434     | Hs.199763            | -2.795325997 | 6.013448535 | 8.808774532 |
| 206663_at    | SP4          | NM_003112 | 6671      | Hs.88013             | -2.793522073 | 3.731168029 | 6.524690102 |
| 231207_at    |              | AW263539  |           |                      | -2.787348119 | 4.725525838 | 7.512873957 |
| 213162_at    | DYNC1L12     | AI640861  | 1783      | Hs.369068            | -2.773858335 | 7.838511025 | 10.61236936 |
| 1564886_at   |              | AL359595  |           |                      | -2.767544079 | 5.193501585 | 7.961045665 |
| 229943_at    | TRIM13       | BF939833  | 10206     | Hs.436922            | -2.757359546 | 4.45132393  | 7.208683476 |
| 239448_at    |              | AI475033  |           |                      | -2.755619279 | 4.09421581  | 6.849835089 |
| 227741_at    | PTPLB        | AI813654  | 201562    | Hs.705480            | -2.753251738 | 7.637406825 | 10.39065856 |
| 216915_s_at  | PTPN12       | S69182    | 5782      | Hs.61812             | -2.74059352  | 5.887432522 | 8.628026042 |
| 215206_at    |              | AK025143  |           |                      | -2.7402199   | 4.502282834 | 7.242502734 |
| 91816_f_at   | MEX3D        | C18318    | 399664    | Hs.436495            | -2.70654701  | 7.20119131  | 9.90773832  |
| 210943_s_at  | LYST         | U84744    | 1130      | Hs.532411            | -2.700099806 | 6.34252109  | 9.042620896 |
| 243088_at    |              | W84667    |           |                      | -2.67868604  | 4.852834028 | 7.531520068 |
| 238362_at    |              | AW271932  |           |                      | -2.673766137 | 5.247710052 | 7.921476188 |
| 241683_at    | HECTD1       | AW207734  | 25831     | Hs.708017            | -2.667834863 | 5.942451088 | 8.610285951 |
| 224853_at    | SLAIN2       | AI979301  | 57606     | Hs.479677            | -2.664561729 | 7.281389556 | 9.945951285 |
| 212142_at    | MCM4         | AI936566  | 4173      | Hs.460184            | -2.661856559 | 6.863011566 | 9.524868126 |
| 239147_at    | ARSK         | AI243677  | 153642    | Hs.585051            | -2.66094394  | 5.323576047 | 7.984519987 |
| 222145_at    |              | AK027225  |           |                      | -2.660821759 | 4.237855672 | 6.898677432 |
| 244331_at    |              | AW296971  |           |                      | -2.64933977  | 4.310294813 | 6.959634583 |
| 1557812_a_at |              | AI140531  |           |                      | -2.646531706 | 3.439620046 | 6.086151752 |
| 228553_at    | ENAH         | AI692870  | 55740     | Hs.497893            | -2.630100623 | 6.494486534 | 9.124587157 |
| 228250_at    | FNIP1        | AW263086  | 96459     | Hs.591273            | -2.628025487 | 7.150073891 | 9.778099378 |
| 236207_at    | SSFA2        | BE083088  | 6744      | Hs.591602            | -2.619212668 | 7.287480176 | 9.906692844 |
| 1569664_at   |              | BC035915  |           |                      | -2.610810511 | 4.31112801  | 6.92193852  |
| 235167_at    | LOC100190986 | BE972419  | 100190986 | Hs.611072, Hs.648439 | -2.597718187 | 5.644654235 | 8.242372423 |
| 1563687_a_at | FRYL         | U80082    | 285527    | Hs.631525            | -2.579676481 | 5.539031509 | 8.118707989 |
| 239046_at    |              | AA322245  |           |                      | -2.579236796 | 4.176493803 | 6.755730599 |

|              |         |           |        |                             |              |             |             |
|--------------|---------|-----------|--------|-----------------------------|--------------|-------------|-------------|
| 235653_s_at  | THAP6   | BF685315  | 152815 | Hs.479971                   | -2.575973183 | 4.744428973 | 7.320402156 |
| 235172_at    |         | AW977516  |        |                             | -2.574668313 | 5.954266285 | 8.528934597 |
| 1558378_a_at | AHNAK2  | BC004283  | 113146 | Hs.441783                   | -2.563199313 | 8.642932097 | 11.20613141 |
| 1557227_s_at | TPR     | AW235355  | 7175   | Hs.279640                   | -2.56028106  | 8.972057155 | 11.53233821 |
| 242302_at    | PDS5B   | BF222521  | 23047  | Hs.716441                   | -2.560011527 | 5.105605245 | 7.665616772 |
| 230775_s_at  |         | BF590192  |        |                             | -2.557246882 | 5.601938149 | 8.159185031 |
| 1569312_at   |         | BE383308  |        |                             | -2.555138846 | 5.626127455 | 8.181266301 |
| 229193_at    |         | AA005430  |        |                             | -2.550396378 | 5.512913251 | 8.063309629 |
| 244753_at    |         | BF000430  |        |                             | -2.547652184 | 4.464126148 | 7.011778332 |
| 1556352_at   |         | AI692624  |        |                             | -2.546014248 | 4.790049392 | 7.33606364  |
| 1555294_a_at | ERC1    | AB053469  | 23085  | Hs.655744, Hs.658200        | -2.541966789 | 4.252092402 | 6.794059191 |
| 214474_at    | PRKAB2  | NM_005399 | 5565   | Hs.50732                    | -2.535407522 | 5.017077616 | 7.552485138 |
| 203319_s_at  | ZNF148  | L04282    | 7707   | Hs.592591                   | -2.52416535  | 6.821116323 | 9.345281673 |
| 230400_s_at  | PKN2    | BE502469  | 5586   | Hs.440833                   | -2.519740684 | 6.049694539 | 8.569435223 |
| 235709_at    | GAS2L3  | H37811    | 283431 | Hs.20575                    | -2.518620692 | 6.625647189 | 9.144267881 |
| 235461_at    | TET2    | BG250414  | 54790  | Hs.367639                   | -2.518531909 | 3.871154205 | 6.389686114 |
| 214375_at    |         | AI962377  |        |                             | -2.517805954 | 4.942967179 | 7.460773133 |
| 230332_at    | ZCCHC7  | AA872187  | 84186  | Hs.654700                   | -2.514486271 | 4.262275288 | 6.776761559 |
| 242068_at    |         | AA608834  |        |                             | -2.513718971 | 4.579181271 | 7.092900242 |
| 239274_at    |         | AV729557  |        |                             | -2.501756694 | 3.867366781 | 6.369123475 |
| 230669_at    | RASA2   | W38444    | 5922   | Hs.655941                   | -2.501744846 | 5.942792566 | 8.444537412 |
| 204654_s_at  | TFAP2A  | NM_003220 | 7020   | Hs.519880                   | -2.500849171 | 6.128110591 | 8.628959762 |
| 235811_at    |         | AW590853  |        |                             | -2.499236463 | 3.946692673 | 6.445929136 |
| 216211_at    |         | AL049233  |        |                             | -2.490446166 | 4.357552618 | 6.847998784 |
| 229858_at    |         | AU146893  |        |                             | -2.480718791 | 5.073783264 | 7.554502055 |
| 1558561_at   | HM13    | AK074686  | 81502  | Hs.373741                   | -2.479242902 | 4.357552618 | 6.836795521 |
| 235009_at    | BOD1L   | AI049791  | 259282 | Hs.718459                   | -2.471626832 | 7.47584317  | 9.947470001 |
| 242019_at    | LASS6   | BG257755  | 253782 | Hs.506829, Hs.718403        | -2.469099153 | 5.900056864 | 8.369156016 |
| 229783_at    |         | AI523593  |        |                             | -2.466768859 | 6.154198232 | 8.620967091 |
| 205809_s_at  | WASL    | BE504979  | 8976   | Hs.143728, Hs.708402        | -2.465595215 | 7.027286517 | 9.492881732 |
| 224563_at    | WASF2   | BG338758  | 10163  | Hs.590909                   | -2.465537619 | 8.608612904 | 11.07415052 |
| 1559391_s_at |         | AI084451  |        |                             | -2.463672018 | 4.337589334 | 6.801261352 |
| 221220_s_at  | SCYL2   | NM_017988 | 55681  | Hs.506481                   | -2.459780879 | 4.781028302 | 7.240809181 |
| 244768_at    | DYNC1H1 | BF447122  | 1778   | Hs.649497                   | -2.457953617 | 5.233272228 | 7.691225845 |
| 236462_at    |         | AA742310  |        |                             | -2.456591817 | 4.292994843 | 6.749586659 |
| 1556551_s_at | SLC39A6 | BQ027619  | 25800  | Hs.719277                   | -2.434393941 | 6.763246656 | 9.197640598 |
| 1558392_at   | SYNE2   | BQ363771  | 23224  | Hs.525392                   | -2.432181558 | 4.531834324 | 6.964015882 |
| 238350_at    | UBN2    | AW967956  | 254048 | Hs.153458, Hs.511486, Hs.62 | -2.428680569 | 5.669148615 | 8.097829184 |
| 242918_at    | NASP    | AU144734  | 4678   | Hs.319334                   | -2.428310725 | 5.543310653 | 7.971621378 |
| 213799_s_at  | PTPRA   | BF740139  | 5786   | Hs.269577                   | -2.425893906 | 6.313559056 | 8.739452962 |
| 224770_s_at  | NAV1    | AI937060  | 89796  | Hs.585374                   | -2.422580048 | 7.190604271 | 9.613184318 |
| 229935_s_at  | MLL     | BF057352  | 4297   | Hs.258855                   | -2.422070496 | 5.777090787 | 8.199161284 |
| 241079_at    |         | R97021    |        |                             | -2.419487982 | 4.63038948  | 7.049877462 |

|                         |           |                      |        |                             |              |             |             |
|-------------------------|-----------|----------------------|--------|-----------------------------|--------------|-------------|-------------|
| 212758_s_at             | ZEB1      | AI373166             | 6935   | Hs.124503                   | -2.419298085 | 7.344910499 | 9.764208585 |
| 1568765_at              | SERPINE1  | BC020765             | 5054   | Hs.414795, Hs.713079        | -2.413625162 | 6.423626621 | 8.837251783 |
| 235160_at               | ATF7      | BG105181             | 11016  | Hs.12286                    | -2.411221094 | 5.52136373  | 7.932584825 |
| 201683_x_at             | TOX4      | BE783632             | 9878   | Hs.555910                   | -2.409278507 | 6.638460369 | 9.047738876 |
| 224854_s_at             | SLAIN2    | AI979301             | 57606  | Hs.479677                   | -2.40897806  | 7.069818937 | 9.478796997 |
| 213816_s_at             | MET       | AA005141             | 4233   | Hs.132966                   | -2.408468263 | 6.89569118  | 9.304159442 |
| 220797_at               | METT10D   | NM_024086            | 79066  | Hs.632237                   | -2.405767666 | 5.565297659 | 7.971065325 |
| 1567045_at              |           | AF085866             |        |                             | -2.395125282 | 5.299825108 | 7.694950391 |
| 233928_at               | ADAMTS9   | AB037733             | 56999  | Hs.656071                   | -2.394984668 | 4.560194672 | 6.95517934  |
| 212620_at               | ZNF609    | AW165979             | 23060  | Hs.595451, Hs.696256, Hs.71 | -2.392850978 | 6.444094367 | 8.836945344 |
| 243303_at               |           | AA811657             |        |                             | -2.3895071   | 5.05872826  | 7.448235359 |
| 241407_at               |           | BF032023             |        |                             | -2.388118164 | 5.108395695 | 7.496513859 |
| 215774_s_at             | SUCLG2    | AV650470             | 8801   | Hs.655250                   | -2.385832698 | 5.746619369 | 8.132452067 |
| 241661_at               | JMJD1C    | AA001021             | 221037 | Hs.413416                   | -2.385643641 | 6.219886029 | 8.605529669 |
| 1553191_at              | DST       | NM_020388            | 667    | Hs.631992, Hs.669931        | -2.382479831 | 4.161960958 | 6.544440789 |
| 216884_at               | PTPN12    | S69182               | 5782   | Hs.61812                    | -2.379731653 | 6.056765865 | 8.436497518 |
| 219273_at               | CCNK      | NM_003858            | 8812   | Hs.510409                   | -2.378223732 | 7.573321682 | 9.951545414 |
| 205017_s_at             | MBNL2     | AI088145             | 10150  | Hs.657347                   | -2.37682099  | 4.827520368 | 7.204341358 |
| 211584_s_at             | NPAT      | U58852               | 4863   | Hs.171061, Hs.367437        | -2.376293243 | 4.608150458 | 6.984443702 |
| 211914_x_at             | NF1       | M60915               | 4763   | Hs.113577                   | -2.372760723 | 5.557886369 | 7.930647092 |
| 226603_at               | SAMD9L    | BE966604             | 219285 | Hs.489118                   | 2.372621519  | 8.707961657 | 6.335340138 |
| 217620_s_at             | PIK3CB    | AA805318             | 5291   | Hs.239818                   | -2.369239082 | 3.669907648 | 6.03914673  |
| 230630_at               | AK3L1     | AI566130             | 205    | Hs.10862, Hs.592601         | -2.365446743 | 4.938237573 | 7.303684316 |
| 243648_at               |           | AA280627             |        |                             | -2.361221001 | 4.612951871 | 6.974172872 |
| 243995_at               | PTAR1     | N36417               | 375743 | Hs.719295                   | -2.359680049 | 5.413700081 | 7.77338013  |
| 222282_at               |           | AV761453             |        |                             | -2.359047858 | 5.977963784 | 8.337011642 |
| 244357_at               |           | T90760               |        |                             | -2.357848799 | 4.489069532 | 6.846918331 |
| 214786_at               | MAP3K1    | AA361361             | 4214   | Hs.653654                   | -2.351298611 | 4.190899102 | 6.542197713 |
| 223963_s_at             | IGF2BP2   | AF117107             | 10644  | Hs.35354                    | -2.351089586 | 5.876222104 | 8.227311689 |
| AFFX-HUMRGE/M10098_3_at |           | AFFX-HUMRGE/M10098_3 |        |                             | -2.347640224 | 8.550298084 | 10.89793831 |
| 237895_at               |           | AV700930             |        |                             | -2.345810669 | 5.030933492 | 7.376744161 |
| 229658_at               | BAZ1B     | BF221513             | 9031   | Hs.719243                   | -2.344255503 | 6.337122103 | 8.681377606 |
| 208750_s_at             | ARF1      | AA580004             | 375    | Hs.286221                   | -2.33904141  | 9.51975809  | 11.8587995  |
| 214127_s_at             | SRRT      | H28020               | 51593  | Hs.111801                   | -2.322637859 | 6.233571531 | 8.55620939  |
| 1556432_at              |           | BM987612             |        |                             | -2.322133535 | 4.290850813 | 6.612984348 |
| 1552680_a_at            | CASC5     | NM_020380            | 57082  | Hs.181855                   | -2.319534247 | 6.756426719 | 9.075960966 |
| 212113_at               | LOC552889 | AI927479             | 552889 | Hs.213541                   | -2.3171593   | 5.728904935 | 8.046064235 |
| 242038_at               | LRRC8B    | BG037106             | 23507  | Hs.482017, Hs.632420        | -2.316898625 | 4.702720125 | 7.01961875  |
| 204969_s_at             | RDX       | NM_002906            | 5962   | Hs.263671, Hs.592679        | -2.312309639 | 4.442549661 | 6.7548593   |
| 242645_at               |           | N58278               |        |                             | -2.304070864 | 5.112919905 | 7.41699077  |
| 235713_at               | ALKBH8    | BF242537             | 91801  | Hs.503763                   | -2.301123776 | 5.537754911 | 7.838878687 |
| 214537_at               | HIST1H1D  | NM_005320            | 3007   | Hs.136857                   | -2.299483823 | 8.46833978  | 10.7678236  |
| 210932_s_at             | RNF6      | AF293342             | 6049   | Hs.136885                   | -2.295537182 | 6.164943881 | 8.460481063 |

|              |          |           |        |                             |              |             |             |
|--------------|----------|-----------|--------|-----------------------------|--------------|-------------|-------------|
| 232556_at    |          | AK021952  |        |                             | -2.295105296 | 7.041007034 | 9.336112329 |
| 1565887_at   | TRPM7    | AF086174  | 54822  | Hs.512894                   | -2.293585264 | 4.898714429 | 7.192299692 |
| 228582_x_at  |          | AI475544  |        |                             | -2.292600057 | 9.730803235 | 12.0234038  |
| 1554671_a_at | SRRM2    | BC041155  | 23524  | Hs.433343, Hs.719123        | -2.292287832 | 7.973673127 | 10.26596096 |
| 210407_at    | PPM1A    | AF070670  | 5494   | Hs.130036                   | -2.290768855 | 4.577405822 | 6.868174677 |
| 220825_s_at  | KIRREL   | NM_018240 | 55243  | Hs.609291, Hs.657006        | -2.290640544 | 6.069114366 | 8.359754909 |
| 1554986_a_at | SNX19    | BC031620  | 399979 | Hs.444024                   | -2.290110985 | 5.211815397 | 7.501926381 |
| 200607_s_at  | RAD21    | BG289967  | 5885   | Hs.81848                    | -2.286070653 | 9.203693259 | 11.48976391 |
| 1558000_at   | ARID5B   | BU171496  | 84159  | Hs.535297                   | -2.284965873 | 4.108792766 | 6.393758638 |
| 233370_at    |          | AK024973  |        |                             | -2.284041413 | 3.842677667 | 6.12671908  |
| 215451_s_at  | AFF1     | BF575588  | 4299   | Hs.480190                   | -2.283301485 | 6.282571132 | 8.565872618 |
| 244793_at    |          | AI733237  |        |                             | -2.2805164   | 3.983403167 | 6.263919567 |
| 216519_s_at  | PROSC    | AK021923  | 11212  | Hs.304792, Hs.608177        | -2.279974567 | 5.643071788 | 7.923046355 |
| 243253_at    |          | AA699346  |        |                             | -2.278261243 | 6.384417618 | 8.66267886  |
| 1553685_s_at | SP1      | NM_138473 | 6667   | Hs.620754, Hs.649191        | -2.276791572 | 4.38161332  | 6.658404891 |
| 215447_at    | TFPI     | AL080215  | 7035   | Hs.516578                   | -2.273820193 | 4.050128411 | 6.323948604 |
| 243293_at    |          | AA765786  |        |                             | -2.27360731  | 4.489069532 | 6.762676842 |
| 1560705_at   |          | AW627717  |        |                             | -2.273368925 | 4.06379958  | 6.337168505 |
| 218554_s_at  | ASH1L    | NM_018489 | 55870  | Hs.491060                   | -2.267308929 | 5.050432209 | 7.317741138 |
| 213763_at    | HIPK2    | R37104    | 28996  | Hs.397465, Hs.632033        | -2.262379959 | 8.055154561 | 10.31753452 |
| 1555408_at   |          | AF218570  |        |                             | -2.262124755 | 4.833440777 | 7.095565532 |
| 81737_at     | NPIPL3   | AI424872  | 23117  | Hs.552700, Hs.611072, Hs.63 | -2.260005757 | 4.922790085 | 7.182795842 |
| 215541_s_at  | DIAPH1   | AK023345  | 1729   | Hs.529451                   | -2.259781306 | 5.675800338 | 7.935581644 |
| 235716_at    |          | AW157450  |        |                             | -2.256022579 | 5.769086337 | 8.025108915 |
| 238751_at    |          | AI343000  |        |                             | -2.251552371 | 5.536785598 | 7.78833797  |
| 226172_at    | USP42    | AU124746  | 84132  | Hs.31856, Hs.707731         | -2.249612485 | 5.966416534 | 8.216029019 |
| 227510_x_at  | MALAT1   | AL037917  | 378938 | Hs.642877, Hs.714394        | -2.249461091 | 10.16680774 | 12.41626883 |
| 222787_s_at  | TMEM106B | AV705186  | 54664  | Hs.396358                   | -2.243678903 | 7.623581696 | 9.8672606   |
| 1552611_a_at | JAK1     | AL555086  | 3716   | Hs.207538                   | -2.242617391 | 7.704464757 | 9.947082148 |
| 215511_at    | TCF20    | U19345    | 6942   | Hs.475018                   | -2.2386616   | 4.346601342 | 6.585262942 |
| 243552_at    | MBTD1    | AW008914  | 54799  | Hs.656803                   | -2.235642357 | 3.88448038  | 6.120122737 |
| 214483_s_at  | ARFIP1   | AF124489  | 27236  | Hs.416089                   | -2.234954093 | 7.53710784  | 9.772061933 |
| 212452_x_at  | MYST4    | AF113514  | 23522  | Hs.35758, Hs.599543         | -2.231147619 | 6.422713481 | 8.653861101 |
| 232095_at    |          | BG109134  |        |                             | -2.229692043 | 7.288980266 | 9.518672309 |
| 222755_s_at  | CHD7     | AI475906  | 55636  | Hs.20395                    | -2.229172676 | 4.176134043 | 6.405306718 |
| 229982_at    | QSER1    | AW195525  | 79832  | Hs.369368                   | -2.223783995 | 6.059613647 | 8.283397642 |
| 238688_at    | TPM1     | AI521618  | 7168   | Hs.133892                   | -2.222287361 | 4.596605537 | 6.818892898 |
| 242349_at    | HECTD1   | AW275658  | 25831  | Hs.708017                   | -2.218982013 | 5.245357542 | 7.464339555 |
| 241630_at    |          | AA742279  |        |                             | -2.217489049 | 4.457482912 | 6.67497196  |
| 203899_s_at  | CRCP     | NM_014478 | 27297  | Hs.300684                   | -2.214180875 | 6.864895506 | 9.079076381 |
| 238145_at    | ZNF496   | AI798611  | 84838  | Hs.654803                   | -2.213950821 | 3.958771879 | 6.1727227   |
| 204180_s_at  | ZBTB43   | AI745225  | 23099  | Hs.355581, Hs.718657        | -2.212454214 | 7.038498219 | 9.250952432 |
| 203653_s_at  | COIL     | BG391060  | 8161   | Hs.532795                   | -2.211868653 | 7.969412702 | 10.18128135 |

|              |              |           |        |                      |              |             |              |
|--------------|--------------|-----------|--------|----------------------|--------------|-------------|--------------|
| 211088_s_at  | PLK4         | Z25433    | 10733  | Hs.172052            | -2.211139914 | 4.721875674 | 6.933015588  |
| 211874_s_at  | MYST4        | AF119230  | 23522  | Hs.35758, Hs.599543  | -2.20818169  | 6.273058129 | 8.481239819  |
| 210057_at    | SMG1         | U32581    | 23049  | Hs.460179, Hs.552700 | -2.206323696 | 7.025916005 | 9.232239701  |
| 212477_at    | ACAP2        | D26069    | 23527  | Hs.593373            | -2.205617578 | 6.255754012 | 8.461371591  |
| 230392_at    |              | AW298141  |        |                      | -2.202140307 | 4.531834324 | 6.733974631  |
| 244574_at    | PTPRG        | AV752058  | 5793   | Hs.595541, Hs.654488 | -2.201462984 | 5.637826104 | 7.839289088  |
| 238848_at    | OTUD4        | BF750565  | 54726  | Hs.270851            | -2.201116792 | 6.393436001 | 8.594552793  |
| 1558214_s_at | CTNNA1       | BG330076  | 1495   | Hs.534797, Hs.656653 | -2.201026919 | 7.41159507  | 9.612621989  |
| 225718_at    | KIAA1715     | AL133768  | 80856  | Hs.209561            | -2.196950454 | 6.489396918 | 8.686347372  |
| 238706_at    | PAPD4        | BG168850  | 167153 | Hs.418198            | -2.196422157 | 4.149234718 | 6.345656875  |
| 217332_at    | RP11-159J2.1 | AL133018  | 647288 | Hs.567920            | 2.196087552  | 7.314631349 | 5.118543797  |
| 1556381_at   | NARG1        | AK091308  | 80155  | Hs.715706            | -2.194746304 | 4.069173263 | 6.263919567  |
| 242722_at    | LMO7         | AA100793  | 4008   | Hs.207631            | -2.192194573 | 5.640705692 | 7.832900265  |
| 212634_at    | KIAA0776     | AW298092  | 23376  | Hs.149367            | -2.192078077 | 7.069126923 | 9.261205     |
| 201766_at    | ELAC2        | AF304370  | 60528  | Hs.434232            | -2.189172143 | 5.262023582 | 7.451195726  |
| 224235_at    |              | AF119853  |        |                      | -2.184751004 | 5.316985666 | 7.50173667   |
| 1557128_at   | FAM111B      | AA960844  | 374393 | Hs.186579            | -2.183813027 | 6.241620291 | 8.425433317  |
| 224828_at    | CPEB4        | AV704132  | 80315  | Hs.127126            | -2.182310362 | 7.427762543 | 9.610072905  |
| 203294_s_at  | LMAN1        | U09716    | 3998   | Hs.465295            | -2.182269158 | 5.174668322 | 7.35693748   |
| 237241_at    | ECT2         | AW269645  | 1894   | Hs.518299            | -2.181367954 | 7.712046871 | 9.893414826  |
| 222826_at    | PLDN         | BC004819  | 26258  | Hs.719102            | -2.176937084 | 5.672527347 | 7.849464432  |
| 206035_at    | REL          | NM_002908 | 5966   | Hs.631886            | -2.175716481 | 4.369868443 | 6.545584924  |
| 1558486_at   | ZNF493       | BC022394  | 284443 | Hs.656558            | -2.174775976 | 4.211944605 | 6.386720581  |
| 1557852_at   |              | AW418842  |        |                      | -2.174421351 | 7.008691307 | 9.183112657  |
| 216375_s_at  | ETV5         | X76184    | 2119   | Hs.43697             | -2.173685698 | 6.709285602 | 8.8829713    |
| 242049_s_at  | NBAS         | BE783098  | 51594  | Hs.467759            | -2.170032474 | 6.021674879 | 8.191707352  |
| 216867_s_at  | PDGFA        | X03795    | 5154   | Hs.535898            | -2.168430423 | 7.781762577 | 9.950193     |
| 232307_at    |              | AK021554  |        |                      | -2.162528115 | 4.357552618 | 6.520080733  |
| 233105_at    |              | AK026280  |        |                      | -2.156976302 | 5.35002122  | 7.506997522  |
| 1559723_s_at |              | BC042892  |        |                      | -2.154547284 | 4.476074044 | 6.630621328  |
| 230340_s_at  | WASL         | AW173001  | 8976   | Hs.143728, Hs.708402 | -2.154377977 | 6.545798403 | 8.700176381  |
| 204182_s_at  | ZBTB43       | NM_014007 | 23099  | Hs.355581, Hs.718657 | -2.153931084 | 7.521064231 | 9.674995314  |
| 244396_at    | G3BP1        | BE673925  | 10146  | Hs.587054            | -2.15391874  | 7.681919171 | 9.8355837911 |
| 1565436_s_at | MLL          | AF024540  | 4297   | Hs.258855            | -2.152458156 | 7.268583196 | 9.421041352  |
| 238420_at    |              | AV721958  |        |                      | -2.152240237 | 5.452597077 | 7.604837314  |
| 240105_at    |              | AI021902  |        |                      | -2.149867133 | 5.012882734 | 7.162749867  |
| 208701_at    | APLP2        | BC000373  | 334    | Hs.709184            | -2.149610655 | 8.822873038 | 10.97248369  |
| 202549_at    | VAPB         | AK025720  | 9217   | Hs.182625            | -2.149363391 | 7.082767555 | 9.232130945  |
| 243361_at    | SFRS12       | N51597    | 140890 | Hs.519347            | -2.148804301 | 6.112183836 | 8.260988136  |
| 240787_at    |              | AW449433  |        |                      | -2.145453858 | 4.49112033  | 6.636574189  |
| 225115_at    | HIPK2        | BF529628  | 28996  | Hs.397465, Hs.632033 | -2.145074304 | 7.363974993 | 9.509049297  |
| 240451_at    |              | AA004844  |        |                      | -2.142462557 | 4.234590774 | 6.377053331  |
| 226812_at    | ZFP91        | AI924343  | 80829  | Hs.524920            | -2.141905514 | 6.877288045 | 9.019193559  |

|              |           |           |        |                      |              |             |             |
|--------------|-----------|-----------|--------|----------------------|--------------|-------------|-------------|
| 1555677_s_at | SMC1A     | BC046147  | 8243   | Hs.211602            | -2.140237321 | 7.446971717 | 9.587209037 |
| 235645_at    | ESCO1     | AW501507  | 114799 | Hs.464733            | -2.13647875  | 7.323878391 | 9.460357141 |
| 1558135_at   | TAF11     | BQ709323  | 6882   | Hs.112444            | -2.13578568  | 5.299825108 | 7.435610788 |
| 242343_x_at  |           | H57111    |        |                      | -2.135230392 | 5.475142643 | 7.610373035 |
| 242983_at    |           | AI806626  |        |                      | -2.132844413 | 5.151689475 | 7.284533888 |
| 1570202_a_at | MKL2      | BC034934  | 57496  | Hs.49143             | -2.132409974 | 4.30944653  | 6.441856503 |
| 229216_s_at  | CSNK2A1   | AI090987  | 1457   | Hs.644056            | -2.13103404  | 8.371454813 | 10.50248885 |
| 239238_at    |           | AI208857  |        |                      | -2.130064606 | 5.436894039 | 7.566958645 |
| 224580_at    | SLC38A1   | BF515894  | 81539  | Hs.694701            | -2.129843384 | 7.328048413 | 9.457891797 |
| 241659_at    | JMJD1C    | AA001021  | 221037 | Hs.413416            | -2.12949687  | 5.730876849 | 7.860373719 |
| 1561705_at   |           | BC037861  |        |                      | -2.127588118 | 5.678843569 | 7.806431687 |
| 243496_at    | RAB18     | AW367507  | 22931  | Hs.406799            | -2.124918609 | 4.886430365 | 7.011348974 |
| 223038_s_at  | FAM60A    | BG479856  | 58516  | Hs.505154            | -2.124859233 | 8.500947825 | 10.62580706 |
| 1564039_at   | ZSCAN23   | AK092117  | 222696 | Hs.376873            | -2.124425066 | 4.162830666 | 6.287255732 |
| 233465_at    |           | AA026390  |        |                      | -2.123290188 | 4.887613174 | 7.010903361 |
| 211540_s_at  | RB1       | M19701    | 5925   | Hs.408528            | -2.122952848 | 3.943991307 | 6.066944156 |
| 235803_at    |           | AA843122  |        |                      | -2.121376853 | 4.195157949 | 6.316534802 |
| 1568680_s_at | YTHDC2    | BC019100  | 64848  | Hs.231942            | -2.120431516 | 7.204542029 | 9.324973545 |
| 237333_at    | RBBP4     | T90771    | 5928   | Hs.16003             | -2.118981651 | 8.008226743 | 10.12720839 |
| 242352_at    | NIPBL     | AW272262  | 25836  | Hs.481927            | -2.116680181 | 8.537389255 | 10.65406944 |
| 210973_s_at  | FGFR1     | M63889    | 2260   | Hs.264887            | -2.11508078  | 6.082906406 | 8.197987185 |
| 209355_s_at  | PPAP2B    | AB000889  | 8613   | Hs.405156, Hs.715848 | -2.114272244 | 5.391755931 | 7.506028175 |
| 1562056_at   |           | BU955063  |        |                      | -2.114064364 | 7.467475582 | 9.581539946 |
| 1558028_x_at | LOC647979 | BI857154  | 647979 | Hs.649310, Hs.718413 | -2.114008538 | 6.514871092 | 8.62887963  |
| 214496_x_at  | MYST4     | NM_012330 | 23522  | Hs.35758, Hs.599543  | -2.112789844 | 6.404793547 | 8.517583391 |
| 228657_at    | KIF1B     | AI952999  | 23095  | Hs.97858             | -2.11264163  | 6.381562423 | 8.494204053 |
| 240262_at    |           | AI251870  |        |                      | -2.111887086 | 4.726755112 | 6.838642198 |
| 232379_at    | SKIL      | Z19588    | 6498   | Hs.581632            | -2.111319742 | 4.67824429  | 6.789564031 |
| 231979_at    |           | AU155091  |        |                      | -2.111041395 | 4.320503862 | 6.431545257 |
| 205688_at    | TFAP4     | NM_003223 | 7023   | Hs.513305            | -2.10821072  | 6.919310252 | 9.027520973 |
| 231064_s_at  | NUP50     | AW629423  | 10762  | Hs.715672            | -2.106665597 | 5.595478388 | 7.702143985 |
| 244185_at    |           | AA921841  |        |                      | -2.106136608 | 5.196977542 | 7.30311415  |
| 205787_x_at  | ZC3H11A   | AI803216  | 9877   | Hs.532399            | -2.104924634 | 8.828473384 | 10.93339802 |
| 241702_at    |           | AI521273  |        |                      | -2.103820936 | 5.226906686 | 7.330727622 |
| 238610_s_at  |           | AI906424  |        |                      | -2.101011371 | 5.366931004 | 7.467942375 |
| 225730_s_at  | THUMPD3   | AI921788  | 25917  | Hs.443081            | -2.099182831 | 8.939111122 | 11.03829395 |
| 202173_s_at  | VEZF1     | NM_007146 | 7716   | Hs.463569            | -2.098659429 | 7.721460992 | 9.820120421 |
| 34478_at     | RAB11B    | X79780    | 9230   | Hs.626404            | -2.097384954 | 6.768799869 | 8.866184824 |
| 204323_x_at  | NF1       | M61213    | 4763   | Hs.113577            | -2.094675741 | 5.833173434 | 7.927849175 |
| 211077_s_at  | TLK1      | Z25421    | 9874   | Hs.719163            | -2.092779014 | 6.39675293  | 8.489531943 |
| 1560680_at   |           | AL833513  |        |                      | -2.091488433 | 5.387056297 | 7.47854473  |
| 238558_at    |           | AI445833  |        |                      | -2.084751742 | 6.367888469 | 8.452640211 |
| 212649_at    | DHX29     | AL079292  | 54505  | Hs.719180            | -2.081909497 | 7.856147203 | 9.9380567   |

|              |           |           |        |                             |              |             |             |
|--------------|-----------|-----------|--------|-----------------------------|--------------|-------------|-------------|
| 211352_s_at  | NCOA3     | U80737    | 8202   | Hs.592142                   | -2.077088107 | 7.205761687 | 9.282849793 |
| 235592_at    |           | AW960145  |        |                             | -2.077070516 | 4.625927349 | 6.702997865 |
| 231866_at    | LNPEP     | AA767440  | 4012   | Hs.527199, Hs.656905        | -2.075544809 | 6.841450273 | 8.916995082 |
| 238349_at    | UBN2      | AW967956  | 254048 | Hs.153458, Hs.511486, Hs.62 | -2.075008195 | 4.587810946 | 6.662819141 |
| 214216_s_at  | LARP4B    | AW628686  | 23185  | Hs.681734, Hs.713649        | -2.069680993 | 5.074895242 | 7.144576234 |
| 232364_at    | FBXO11    | AF176706  | 80204  | Hs.352677                   | -2.068399665 | 4.473523229 | 6.541922893 |
| 1556865_at   |           | AF143885  |        |                             | -2.066615491 | 5.551981619 | 7.618597109 |
| 203348_s_at  | ETV5      | BF060791  | 2119   | Hs.43697                    | -2.066136657 | 8.194470846 | 10.2606075  |
| 239002_at    | ASPM      | AA748494  | 259266 | Hs.121028                   | -2.065201645 | 7.401919924 | 9.467121569 |
| 231106_at    | BMS1P5    | AI684591  | 399761 | Hs.314437, Hs.711074        | -2.062741031 | 5.330020301 | 7.392761331 |
| 234233_s_at  |           | AK024577  |        |                             | -2.059311291 | 4.435437629 | 6.49474892  |
| 232275_s_at  | HS6ST3    | AF339824  | 266722 | Hs.171001                   | -2.057920015 | 6.008939773 | 8.066859789 |
| 1559587_at   | SYMPK     | AL831859  | 8189   | Hs.515475                   | -2.05291617  | 4.505651958 | 6.558568128 |
| 1557384_at   | ZNF131    | AL832081  | 7690   | Hs.535804                   | -2.050502803 | 6.471422312 | 8.521925116 |
| 1557193_at   |           | AI085450  |        |                             | -2.047723828 | 4.121314309 | 6.169038137 |
| 228610_at    | TM9SF3    | AI040432  | 56889  | Hs.500674                   | -2.046807328 | 6.061614759 | 8.108422087 |
| 213606_s_at  | ARHGDI4   | AI571798  | 396    | Hs.159161                   | -2.040983012 | 7.112700317 | 9.153683328 |
| 244464_at    |           | AA668789  |        |                             | -2.040143089 | 3.997301338 | 6.037444428 |
| 201615_x_at  | CALD1     | AI685060  | 800    | Hs.490203                   | -2.039999279 | 9.619032826 | 11.65903211 |
| 233401_at    |           | BF723605  |        |                             | -2.039946708 | 4.228746801 | 6.268693508 |
| 231768_at    | USF1      | X55666    | 7391   | Hs.414880                   | -2.0379552   | 5.647172771 | 7.685127971 |
| 230057_at    | LOC285178 | AI609832  | 285178 | Hs.586683                   | -2.037240598 | 7.555895549 | 9.593136147 |
| 219437_s_at  | ANKRD11   | NM_013275 | 29123  | Hs.335003                   | -2.035831319 | 8.866850397 | 10.90268172 |
| 229834_at    | NFIX      | AI937201  | 4784   | Hs.257970                   | -2.034342208 | 5.880548436 | 7.914890644 |
| 1554873_at   | CSPP1     | BC029445  | 79848  | Hs.370147                   | -2.031082529 | 5.508437263 | 7.539519792 |
| 214352_s_at  | KRAS      | BF673699  | 3845   | Hs.505033                   | -2.029321852 | 8.148121683 | 10.17744353 |
| 203628_at    | IGF1R     | H05812    | 3480   | Hs.643120, Hs.653608, Hs.71 | -2.028089699 | 6.300984803 | 8.329074501 |
| 237158_s_at  | MPHOSPH9  | AW449069  | 10198  | Hs.577404                   | -2.027391007 | 6.26591234  | 8.293303347 |
| 223510_at    | NRP2      | AF280545  | 8828   | Hs.471200                   | -2.026895794 | 5.699703163 | 7.726598957 |
| 241611_s_at  | FND3A     | BE675600  | 22862  | Hs.508010                   | -2.026428178 | 5.331663727 | 7.358091904 |
| 228180_at    |           | AA805653  |        |                             | -2.026377547 | 5.256064174 | 7.282441721 |
| 221098_x_at  | UTP14A    | NM_006649 | 10813  | Hs.458598                   | -2.024417587 | 5.798492291 | 7.822909878 |
| 243839_s_at  |           | AW297257  |        |                             | -2.021703514 | 4.350673126 | 6.37237664  |
| 1558220_at   |           | BM914560  |        |                             | -2.019901192 | 4.69566336  | 6.715564552 |
| 242092_at    | EPB41L2   | AA019300  | 2037   | Hs.486470                   | -2.015842478 | 4.130807194 | 6.146649672 |
| 211681_s_at  | PDLIM5    | AF116705  | 10611  | Hs.480311                   | -2.014803536 | 6.037481134 | 8.05228467  |
| 1554277_s_at | FANCM     | BC036056  | 57697  | Hs.509229                   | -2.014727746 | 5.349414048 | 7.364141794 |
| 236841_at    | WASH3P    | BE464132  | 374666 | Hs.459573, Hs.585931        | -2.013697497 | 5.556203199 | 7.569900696 |
| 204047_s_at  | PHACTR2   | AW295193  | 9749   | Hs.102471                   | -2.009093935 | 6.827273008 | 8.836366943 |
| 235575_at    |           | AA682539  |        |                             | -2.009052843 | 5.088100244 | 7.097153087 |
| 224282_s_at  | AGPAT3    | AB040138  | 56894  | Hs.248785                   | -2.006790645 | 6.124466308 | 8.131256953 |
| 214008_at    | TWF1      | N25562    | 5756   | Hs.189075                   | -2.005497439 | 5.990751759 | 7.996249198 |
| 232028_at    | ZNF678    | AK026475  | 339500 | Hs.30323                    | -2.005321403 | 5.254613662 | 7.259935065 |



|              |          |           |        |                      |              |             |             |
|--------------|----------|-----------|--------|----------------------|--------------|-------------|-------------|
| 1556656_at   |          | BF477401  |        |                      | -2.00505903  | 4.11645306  | 6.12151209  |
| 236595_at    |          | AA776458  |        |                      | -2.002957876 | 5.412360905 | 7.415318781 |
| 242859_at    |          | BE156563  |        |                      | -2.000850096 | 5.971809099 | 7.972659195 |
| 238951_at    |          | BF843343  |        |                      | -2.000440144 | 5.238682196 | 7.239122341 |
| 200841_s_at  | EPRS     | AI142677  | 2058   | Hs.497788            | -1.998270134 | 8.419588423 | 10.41785856 |
| 236957_at    | CDCA2    | AI248208  | 157313 | Hs.33366             | -1.997885698 | 7.203197273 | 9.201082971 |
| 208425_s_at  | TANC2    | NM_015623 | 26115  | Hs.410889            | -1.997193983 | 6.118195906 | 8.115389889 |
| 237184_at    |          | BF110186  |        |                      | -1.996942731 | 4.879656572 | 6.876599303 |
| 243589_at    | KIAA1267 | AI823453  | 284058 | Hs.648744            | -1.9960773   | 5.644438168 | 7.640515468 |
| 220154_at    | DST      | NM_020388 | 667    | Hs.631992, Hs.669931 | -1.995867329 | 7.972578973 | 9.968446302 |
| 200702_s_at  | DDX24    | BG421209  | 57062  | Hs.510328            | -1.992161289 | 9.745344605 | 11.73750589 |
| 1558449_at   |          | BC040475  |        |                      | -1.991446495 | 4.182863829 | 6.174310324 |
| 238468_at    | TNRC6B   | AA214704  | 23112  | Hs.372082            | -1.990164193 | 7.213653356 | 9.20381755  |
| 244026_at    |          | BF063657  |        |                      | -1.986595949 | 4.032843122 | 6.01943907  |
| 244356_at    |          | AL079909  |        |                      | -1.98614886  | 6.133274709 | 8.119423569 |
| 205461_at    | RAB35    | NM_006861 | 11021  | Hs.524788, Hs.719173 | -1.984906755 | 6.073411496 | 8.058318252 |
| 225233_at    | MSI2     | T71491    | 124540 | Hs.658922            | -1.984390809 | 6.194549113 | 8.178939921 |
| 243670_at    |          | BE670161  |        |                      | -1.983686406 | 5.011076363 | 6.994762769 |
| 230099_at    |          | AI139993  |        |                      | -1.982946771 | 4.661550678 | 6.644497449 |
| 220410_s_at  | CAMSAP1  | NM_018627 | 157922 | Hs.522493            | -1.982856191 | 5.130579375 | 7.113435566 |
| 239512_at    | SFRS4    | R05895    | 6429   | Hs.469970            | -1.982312961 | 6.06943664  | 8.0517496   |
| 234168_at    | TAF15    | AK000942  | 8148   | Hs.402752            | -1.977259414 | 5.518021552 | 7.495280966 |
| 205426_s_at  | HIP1     | U79734    | 3092   | Hs.329266, Hs.619089 | -1.974510846 | 6.212971522 | 8.187482368 |
| 227931_at    | INO80D   | AI823917  | 54891  | Hs.445036            | -1.972990771 | 8.245246684 | 10.21823745 |
| 232778_at    |          | AK026036  |        |                      | -1.971228967 | 5.830597247 | 7.801826213 |
| 1558015_s_at | ACTR2    | BU175810  | 10097  | Hs.643727, Hs.719274 | -1.969612086 | 7.595699584 | 9.56531167  |
| 212404_s_at  | UBE3B    | AL096740  | 89910  | Hs.374067            | -1.966671149 | 4.603771654 | 6.570442804 |
| 223818_s_at  | RSF1     | AF059317  | 51773  | Hs.420229            | -1.963054472 | 7.444242061 | 9.407296533 |
| 214718_at    | GATAD1   | AK026142  | 57798  | Hs.21145             | -1.962396664 | 4.558500391 | 6.520897055 |
| 1555372_at   | BCL2L11  | AF455755  | 10018  | Hs.469658            | -1.961583002 | 4.175268979 | 6.136851981 |
| 1570651_at   | CCBL1    | BC022468  | 883    | Hs.495250            | -1.961162841 | 4.418766659 | 6.3799295   |
| 240248_at    |          | AA778783  |        |                      | -1.961144198 | 5.325334908 | 7.286479106 |
| 229574_at    | TRA2A    | AI268231  | 29896  | Hs.445652            | -1.957351547 | 5.337442842 | 7.29479439  |
| 212105_s_at  | DHX9     | BF313832  | 1660   | Hs.191518            | -1.955573446 | 8.889226024 | 10.84479947 |
| 206929_s_at  | NFIC     | NM_005597 | 4782   | Hs.170131            | -1.952901335 | 9.108878857 | 11.06178019 |
| 236023_at    | CDK9     | AI703465  | 1025   | Hs.150423, Hs.706809 | -1.951455998 | 5.371441712 | 7.32289771  |
| 237118_at    |          | AA057437  |        |                      | -1.9494911   | 4.375471476 | 6.324962576 |
| 232711_at    |          | AU146197  |        |                      | -1.948905614 | 5.713314354 | 7.662219968 |
| 207520_at    | TROVE2   | BG494940  | 6738   | Hs.288178            | -1.948292438 | 5.309223074 | 7.257515512 |
| 230216_at    | C12orf51 | BF434969  | 283450 | Hs.695995            | -1.947571608 | 4.531834324 | 6.479405931 |
| 236700_at    | EIF3C    | AI377875  | 8663   | Hs.567374            | -1.94749657  | 5.59692859  | 7.54442516  |
| 1559369_at   | C5orf44  | BI668018  | 80006  | Hs.591760            | -1.943138776 | 4.221261967 | 6.164400744 |
| 202412_s_at  | USP1     | AW499935  | 7398   | Hs.35086             | -1.940941603 | 8.594950254 | 10.53589186 |

|              |          |           |                                   |              |             |             |
|--------------|----------|-----------|-----------------------------------|--------------|-------------|-------------|
| 1569477_at   |          | BC025999  |                                   | -1.940517042 | 5.419260078 | 7.359777121 |
| 236752_at    |          | AA913146  |                                   | -1.939528661 | 4.26528432  | 6.204812981 |
| 233674_at    |          | AK026286  |                                   | -1.938878469 | 5.980071196 | 7.918949665 |
| 1569106_s_at | SETD5    | BI087313  | 55209 Hs.288164                   | -1.935857893 | 5.066566971 | 7.002424865 |
| 223888_s_at  | LARS     | AF151026  | 51520 Hs.432674                   | -1.935777587 | 9.718600798 | 11.65437838 |
| 1570425_s_at | LATS1    | AF119846  | 9113 Hs.716697                    | -1.935567265 | 4.623796524 | 6.55936379  |
| 229115_at    | DYNC1H1  | BF000332  | 1778 Hs.649497                    | -1.935202572 | 8.382779123 | 10.31798169 |
| 205097_at    | SLC26A2  | AI025519  | 1836 Hs.302738                    | -1.934843573 | 7.497993486 | 9.432837059 |
| 213446_s_at  | IQGAP1   | AI679073  | 8826 Hs.430551                    | -1.934162684 | 9.092157928 | 11.02632061 |
| 233323_at    |          | AK024973  |                                   | -1.932147677 | 4.651273545 | 6.583421222 |
| 242886_at    |          | AW007763  |                                   | -1.930997461 | 5.859006645 | 7.790004107 |
| 206269_at    | GCM1     | AB026493  | 8521 Hs.28346                     | 1.928457963  | 6.558289543 | 4.62983158  |
| 222371_at    |          | AI732802  |                                   | -1.925165396 | 4.604719674 | 6.52988507  |
| 215780_s_at  |          | Z95126    |                                   | -1.923906125 | 8.794364923 | 10.71827105 |
| 241155_at    |          | AA704588  |                                   | -1.922847495 | 4.772481098 | 6.695328594 |
| 241762_at    | FBXO32   | BF244402  | 114907 Hs.403933                  | -1.922208504 | 4.53317919  | 6.455387694 |
| 1569607_s_at |          | BC016022  |                                   | -1.921418456 | 5.15732166  | 7.078740116 |
| 208719_s_at  | DDX17    | U59321    | 10521 Hs.528305, Hs.665429, Hs.71 | -1.921200016 | 5.911399081 | 7.832599097 |
| 229895_s_at  | NCK1     | AI377384  | 4690 Hs.477693                    | -1.921144971 | 6.144227355 | 8.065372326 |
| 239957_at    |          | AW510793  |                                   | -1.91978254  | 4.399604943 | 6.319387483 |
| 206652_at    | ZMYM5    | NM_016384 | 9205 Hs.530988                    | -1.917934338 | 6.370141997 | 8.288076335 |
| 238619_at    |          | AA417078  |                                   | -1.917907841 | 6.416643186 | 8.334551027 |
| 241820_at    | RIF1     | BF666241  | 55183 Hs.655671                   | -1.917904345 | 6.171972855 | 8.0898772   |
| 235588_at    | ESCO2    | AA740849  | 157570 Hs.99480                   | -1.917721627 | 7.982759267 | 9.900480894 |
| 235059_at    | RAB12    | BF574430  | 201475 Hs.270074                  | -1.916647017 | 7.820289286 | 9.736936303 |
| 239596_at    | SLC30A7  | AA521381  | 148867 Hs.533903                  | -1.914210943 | 5.103146137 | 7.01735708  |
| 1561640_at   |          | BC008637  |                                   | -1.911784491 | 5.26063402  | 7.172418511 |
| 201868_s_at  | TBL1X    | AI082187  | 6907 Hs.495656                    | -1.910031047 | 8.618883152 | 10.5289142  |
| 227961_at    | CTSB     | AA130998  | 1508 Hs.520898                    | -1.909796301 | 7.575543555 | 9.485339856 |
| 235216_at    | ESCO1    | BG532121  | 114799 Hs.464733                  | -1.909058926 | 8.558619228 | 10.46767815 |
| 242617_at    | TMED8    | AI290654  | 283578 Hs.200413, Hs.26403        | -1.907673101 | 7.61926337  | 9.526936471 |
| 227924_at    | INO80D   | BF571256  | 54891 Hs.445036                   | -1.906053981 | 4.849318857 | 6.755372837 |
| 208151_x_at  | DDX17    | NM_030881 | 10521 Hs.528305, Hs.665429, Hs.71 | -1.905256916 | 6.314689354 | 8.21994627  |
| 235547_at    | N4BP2L2  | BG548427  | 10443 Hs.507680                   | -1.903506902 | 6.735693461 | 8.639200363 |
| 203491_s_at  | CEP57    | AI123527  | 9702 Hs.101014                    | -1.89911262  | 9.141290253 | 11.04040287 |
| 238795_at    | C10orf18 | AA424537  | 54906 Hs.699500                   | -1.898625681 | 5.461381647 | 7.360007328 |
| 213998_s_at  | DDX17    | AW188131  | 10521 Hs.528305, Hs.665429, Hs.71 | -1.898582983 | 8.282378982 | 10.18096196 |
| 200917_s_at  | SRPR     | BG474541  | 6734 Hs.368376                    | -1.898214225 | 6.85027245  | 8.748486676 |
| 214007_s_at  | TWF1     | AW665024  | 5756 Hs.189075                    | -1.895198751 | 6.907745321 | 8.802944072 |
| 209203_s_at  | BICD2    | BC002327  | 23299 Hs.436939                   | -1.894816336 | 7.644155686 | 9.538972022 |
| 1569538_at   |          | AF130084  |                                   | -1.892059635 | 4.988736393 | 6.880796029 |
| 228563_at    | GJC1     | BE504215  | 10052 Hs.532593, Hs.712052        | -1.890739615 | 6.562544775 | 8.45328439  |
| 1559881_s_at | ZNF12    | BM463827  | 7559 Hs.431471                    | -1.890599224 | 6.291151218 | 8.181750442 |

|              |           |           |                            |              |             |             |
|--------------|-----------|-----------|----------------------------|--------------|-------------|-------------|
| 239234_at    |           | AW452419  |                            | -1.889779838 | 6.326115007 | 8.215894845 |
| 227659_at    | PLEKHA3   | BE550332  | 65977 Hs.41086             | -1.888035358 | 6.39073542  | 8.278770778 |
| 244826_at    |           | R24061    |                            | -1.886506486 | 5.431097947 | 7.317604434 |
| 238774_at    |           | AW960454  |                            | -1.885667351 | 5.342918306 | 7.228585657 |
| 232882_at    |           | AA079839  |                            | -1.882579518 | 5.634813199 | 7.517392717 |
| 215079_at    |           | AK026723  |                            | -1.879730678 | 5.285483365 | 7.165214044 |
| 202378_s_at  | LEPROT    | NM_017526 | 54741 Hs.705413            | -1.879035615 | 9.310381652 | 11.18941727 |
| 243074_at    |           | N48990    |                            | -1.879027886 | 4.426879197 | 6.305907083 |
| 235680_at    |           | AI914925  |                            | -1.878701616 | 4.966543914 | 6.845245529 |
| 234932_s_at  | CDCP1     | AK026028  | 64866 Hs.476093            | -1.878568457 | 8.58501337  | 10.46358183 |
| 213926_s_at  | AGFG1     | AI742626  | 3267 Hs.352962             | -1.87708336  | 5.179355671 | 7.056439031 |
| 225571_at    | LIFR      | AA701657  | 3977 Hs.133421             | -1.876499196 | 7.838626834 | 9.715126029 |
| 225801_at    | FBXO32    | AW518714  | 114907 Hs.403933           | -1.876414122 | 5.495766132 | 7.372180253 |
| 227602_at    | RAB7A     | BE858244  | 7879 Hs.15738, Hs.716392   | -1.876162093 | 10.43226457 | 12.30842667 |
| 228803_at    |           | AI809749  |                            | -1.87522815  | 4.904140714 | 6.779368864 |
| 240438_at    |           | AI215674  |                            | -1.875011652 | 5.170438173 | 7.045449825 |
| 213494_s_at  | YY1       | AA748649  | 7528 Hs.388927             | -1.875010619 | 9.227247398 | 11.10225802 |
| 216275_at    | BUB1      | AK023540  | 699 Hs.469649              | -1.873251026 | 7.224392689 | 9.097643716 |
| 1555039_a_at | ABCC4     | AY133679  | 10257 Hs.508423            | -1.873098526 | 6.429982955 | 8.303081481 |
| 231920_s_at  | CSNK1G1   | AK025179  | 53944 Hs.646508            | -1.873008006 | 6.217053641 | 8.090061648 |
| 230173_at    | TRIM4     | BE503987  | 89122 Hs.50749             | -1.872609712 | 5.606578487 | 7.479188199 |
| 217208_s_at  | DLG1      | AL121981  | 1739 Hs.292549             | -1.868492233 | 6.116700096 | 7.985192329 |
| 220466_at    | CCDC15    | NM_025004 | 80071 Hs.287555            | -1.867897891 | 6.685194939 | 8.55309283  |
| 1558410_s_at |           | AW974642  |                            | -1.863165869 | 5.111972583 | 6.975138452 |
| 214888_at    | CAPN2     | AK023851  | 824 Hs.350899              | -1.86308018  | 4.343745793 | 6.206825972 |
| 219843_at    | IPP       | NM_005897 | 3652 Hs.699548             | -1.859946091 | 6.122799987 | 7.982746078 |
| 222873_s_at  | EHMT1     | AI739378  | 79813 Hs.495511            | -1.858643549 | 5.600208631 | 7.45885218  |
| 241499_at    | ZNF621    | AI672426  | 285268 Hs.19977            | -1.857228414 | 5.395903909 | 7.253132323 |
| 213957_s_at  | CEP350    | AA635523  | 9857 Hs.413045             | -1.855788377 | 7.159403747 | 9.015192124 |
| 1563009_at   | LOC284930 | BC039485  | 284930 Hs.407567           | -1.855067621 | 5.279818129 | 7.13488575  |
| 228712_at    |           | AI924616  |                            | -1.853844891 | 7.115337834 | 8.969182725 |
| 1562208_a_at |           | AL137309  |                            | -1.853474159 | 4.692636816 | 6.546110975 |
| 209997_x_at  | PCM1      | BC000453  | 5108 Hs.491148             | -1.852610186 | 7.289270676 | 9.141880862 |
| 242422_at    | G3BP1     | AA180161  | 10146 Hs.587054            | -1.850679904 | 8.354711273 | 10.20539118 |
| 1552621_at   |           | BQ613856  |                            | -1.849127428 | 6.693542978 | 8.542670406 |
| 214753_at    | N4BP2L2   | AW084068  | 10443 Hs.507680            | -1.848411704 | 7.094775953 | 8.943187656 |
| 216629_at    | SRRM2     | AC004493  | 23524 Hs.433343, Hs.719123 | -1.847957799 | 4.68745218  | 6.535409979 |
| 241832_at    | FAM98A    | AI864271  | 25940 Hs.468140            | -1.846900623 | 4.606060813 | 6.452961437 |
| 1554984_a_at | HLA-DOB   | BC020226  | 3112 Hs.1802               | -1.846461997 | 4.952632179 | 6.799094177 |
| 235705_at    |           | BF676361  |                            | -1.843540175 | 7.329852533 | 9.173392708 |
| 228237_at    | PAPPA2    | N30053    | 60676 Hs.187284            | -1.842113364 | 5.718593829 | 7.560707193 |
| 1557953_at   | ZKSCAN1   | BG761185  | 7586 Hs.615360             | -1.841883807 | 8.453741757 | 10.29562556 |
| 205580_s_at  | HRH1      | D28481    | 3269 Hs.1570               | -1.839821807 | 7.328048413 | 9.16787022  |

|              |            |           |        |                      |              |             |             |
|--------------|------------|-----------|--------|----------------------|--------------|-------------|-------------|
| 205188_s_at  | SMAD5      | NM_005903 | 4090   | Hs.167700            | -1.839710297 | 7.575707987 | 9.415418284 |
| 208503_s_at  | GATAD1     | NM_021167 | 57798  | Hs.21145             | -1.83888296  | 7.090851702 | 8.929734662 |
| 1557100_s_at | HECTD1     | AL038005  | 25831  | Hs.708017            | -1.838775911 | 7.089461241 | 8.928237152 |
| 1567044_s_at |            | AF085866  |        |                      | -1.836897711 | 4.906775809 | 6.743673521 |
| 236668_at    |            | AW205474  |        |                      | 1.835840282  | 7.264617078 | 5.428776796 |
| 1556834_at   |            | BC042986  |        |                      | -1.83278175  | 7.158396744 | 8.991178494 |
| 241063_at    |            | BE672556  |        |                      | -1.831262074 | 5.35938929  | 7.190651364 |
| 201167_x_at  | ARHGDI     | D13989    | 396    | Hs.159161            | -1.831035723 | 6.889577492 | 8.720613215 |
| 1554311_a_at | SUPT6H     | BC033074  | 6830   | Hs.250429            | -1.830273866 | 4.622696028 | 6.452969894 |
| 215561_s_at  | IL1R1      | AK026803  | 3554   | Hs.701982            | -1.830242663 | 7.276110926 | 9.106353589 |
| 225377_at    | C9orf86    | BE783949  | 55684  | Hs.370555            | -1.827787929 | 7.732063394 | 9.559851323 |
| 242762_s_at  | FAM171B    | AA372349  | 165215 | Hs.28872             | -1.827715468 | 5.623481864 | 7.451197332 |
| 1558807_at   | ATAD2B     | AK094821  | 54454  | Hs.467862            | -1.826527582 | 5.025521797 | 6.852049379 |
| 220609_at    | LOC202181  | NM_024651 | 202181 | Hs.189914, Hs.653052 | -1.825223167 | 4.344962258 | 6.170185425 |
| 207057_at    | SLC16A7    | NM_004731 | 9194   | Hs.439643            | -1.822017243 | 6.996516047 | 8.818533291 |
| 227744_s_at  | HNRNPD     | AW005670  | 3184   | Hs.480073            | -1.821779918 | 9.45514509  | 11.27692501 |
| 218006_s_at  | ZNF22      | NM_006963 | 7570   | Hs.462693, Hs.655124 | -1.81968722  | 6.637728469 | 8.457415689 |
| 209807_s_at  | NFIX       | U18759    | 4784   | Hs.257970            | -1.815762915 | 8.119265957 | 9.935028872 |
| 233309_at    |            | AU145723  |        |                      | -1.815753179 | 4.532072489 | 6.347825668 |
| 241391_at    |            | AA654772  |        |                      | -1.81530639  | 4.450368217 | 6.265674607 |
| 1563130_a_at |            | AL109710  |        |                      | -1.814742135 | 4.905594755 | 6.72033689  |
| 239718_at    |            | R42552    |        |                      | -1.813665362 | 5.09738949  | 6.911054852 |
| 225097_at    | HIPK2      | BF594155  | 28996  | Hs.397465, Hs.632033 | -1.81237817  | 9.950953154 | 11.76333132 |
| 243236_at    |            | AA807545  |        |                      | -1.810271829 | 4.400719573 | 6.210991401 |
| 215041_s_at  | DOCK9      | BE259050  | 23348  | Hs.596105            | -1.810008571 | 5.164886205 | 6.974894775 |
| 1564494_s_at | P4HB       | AK075503  | 5034   | Hs.464336            | -1.808683276 | 7.7486398   | 9.557323077 |
| 235744_at    | PPTC7      | BG252924  | 160760 | Hs.13854             | -1.808450435 | 4.774100341 | 6.582550776 |
| 238564_at    | FAM171B    | BE326579  | 165215 | Hs.28872             | -1.804162741 | 5.711718816 | 7.515881557 |
| 1554260_a_at | FRYL       | BC021803  | 285527 | Hs.631525            | -1.803791397 | 7.167888765 | 8.971680162 |
| 242125_at    |            | BG280919  |        |                      | -1.802874885 | 5.554787036 | 7.357661921 |
| 223940_x_at  | MALAT1     | AF132202  | 378938 | Hs.642877, Hs.714394 | -1.80231828  | 11.09845474 | 12.90077301 |
| 1557543_at   |            | AL832672  |        |                      | -1.801922137 | 4.546077126 | 6.347999263 |
| 233303_at    |            | AL110175  |        |                      | -1.800745389 | 6.304361028 | 8.105106417 |
| 242774_at    | SYNE2      | AI684761  | 23224  | Hs.525392            | -1.800682158 | 4.504077137 | 6.304759295 |
| 217659_at    |            | AA457019  |        |                      | -1.800565631 | 4.368357593 | 6.168923224 |
| 216048_s_at  | RHOBTB3    | AK023621  | 22836  | Hs.445030            | -1.798064286 | 6.078610722 | 7.876675008 |
| 1558093_s_at | MATR3      | BI832461  | 9782   | Hs.268939            | -1.797594469 | 10.16818966 | 11.96578413 |
| 212468_at    | SPAG9      | AK023512  | 9043   | Hs.463439            | -1.79711466  | 8.564005822 | 10.36112048 |
| 222404_x_at  | PTPLAD1    | AI984229  | 51495  | Hs.512973            | -1.796737262 | 9.62918506  | 11.42592232 |
| 242647_at    | USP34      | AI148382  | 9736   | Hs.644708            | -1.795747493 | 5.035638749 | 6.831386241 |
| 227383_at    |            | AW340595  |        |                      | -1.79542139  | 5.952862314 | 7.748283704 |
| 236899_at    |            | BF445387  |        |                      | -1.795073197 | 4.392389032 | 6.187462229 |
| 239077_at    | CSGALNACT2 | W81648    | 55454  | Hs.657569            | -1.795018259 | 6.117030878 | 7.912049137 |

|              |             |           |           |                             |              |             |             |
|--------------|-------------|-----------|-----------|-----------------------------|--------------|-------------|-------------|
| 201728_s_at  | KIAA0100    | AA904674  | 9703      | Hs.151761                   | -1.794864406 | 9.32008559  | 11.11495    |
| 213298_at    | NFIC        | X12492    | 4782      | Hs.170131                   | -1.794772061 | 8.792389253 | 10.58716131 |
| 223217_s_at  | NFKBIZ      | BE646573  | 64332     | Hs.319171                   | -1.794127838 | 6.960069199 | 8.754197037 |
| 230590_at    |             | BE675486  |           |                             | -1.792014213 | 5.232473536 | 7.024487749 |
| 236966_at    |             | BF942281  |           |                             | -1.791338705 | 5.204611301 | 6.995950007 |
| 215757_at    | PRKDC       | AK022387  | 5591      | Hs.491682                   | -1.790611772 | 6.461925344 | 8.252537116 |
| 214215_s_at  | LARP4B      | AW514174  | 23185     | Hs.681734, Hs.713649        | -1.790076447 | 4.73891489  | 6.528991338 |
| 227454_at    | TAOK1       | AB037782  | 57551     | Hs.631758                   | -1.788556818 | 8.985090396 | 10.77364721 |
| 225937_at    |             | BF002121  |           |                             | -1.787839947 | 7.71953373  | 9.507373677 |
| 225173_at    | ARHGAP18    | BE501862  | 93663     | Hs.486458, Hs.708586        | -1.784548559 | 9.583330385 | 11.36787894 |
| 232333_at    |             | AU147805  |           |                             | -1.783859403 | 5.025528765 | 6.809388168 |
| 229808_at    | CHAF1A      | AI344306  | 10036     | Hs.79018                    | -1.783560499 | 6.321995979 | 8.105556478 |
| 235927_at    | XPO1        | BE350122  | 7514      | Hs.370770                   | -1.782319291 | 7.047221644 | 8.829540935 |
| 211094_s_at  | NF1         | D12625    | 4763      | Hs.113577                   | -1.781711486 | 5.606422417 | 7.388133903 |
| 1559954_s_at | DDX42       | AF147429  | 11325     | Hs.702010                   | -1.780984013 | 7.32188257  | 9.102866583 |
| 1552829_at   |             | NM_018505 |           |                             | -1.780431589 | 5.030933492 | 6.81136508  |
| 240239_at    | ZNF566      | N63953    | 84924     | Hs.533939                   | -1.779790183 | 5.183610448 | 6.963400631 |
| 231956_at    | KIAA1618    | AA976354  | 57714     | Hs.514554                   | -1.77955133  | 4.299945147 | 6.079496477 |
| 1557129_a_at | FAM111B     | AA960844  | 374393    | Hs.186579                   | -1.778200551 | 8.025981222 | 9.804181773 |
| 242665_at    | FMNL2       | AL042120  | 114793    | Hs.654630                   | -1.777009399 | 7.622150975 | 9.399160374 |
| 212392_s_at  | PDE4DIP     | AI950145  | 9659      | Hs.584841, Hs.613082, Hs.65 | -1.775027021 | 7.400673637 | 9.175700658 |
| 222439_s_at  | THRAP3      | BE967048  | 9967      | Hs.160211                   | -1.774901886 | 9.656183119 | 11.43108501 |
| 241955_at    | HECTD1      | BE243270  | 25831     | Hs.708017                   | -1.77443282  | 9.388418085 | 11.1628509  |
| 242751_at    |             | N55072    |           |                             | -1.771590659 | 4.8964863   | 6.668076959 |
| 201072_s_at  | SMARCC1     | AW152160  | 6599      | Hs.476179                   | -1.770628294 | 9.584979502 | 11.3556078  |
| 1554029_a_at | TTC37       | BC030966  | 9652      | Hs.482868                   | -1.769030182 | 6.097313953 | 7.866344135 |
| 1569022_a_at | PIK3C2A     | BC040952  | 5286      | Hs.175343                   | -1.769024789 | 6.44214811  | 8.211172899 |
| 244341_at    |             | AA827728  |           |                             | -1.768774649 | 4.603837825 | 6.372612474 |
| 221350_at    | HOXC8       | NM_022658 | 3224      | Hs.664500                   | -1.76773289  | 6.417230499 | 8.184963388 |
| 1558527_at   | LOC10013270 | AK056609  | 100132707 | Hs.586358                   | -1.767298037 | 4.883736572 | 6.651034609 |
| 1558275_at   |             | BC006120  |           |                             | -1.766468252 | 5.19754763  | 6.964015882 |
| 239197_s_at  | EZH1        | BG470312  | 2145      | Hs.194669                   | -1.766139429 | 6.973220007 | 8.739359436 |
| 236188_s_at  | NAP1L4      | AI381524  | 4676      | Hs.501684, Hs.695395        | -1.7658537   | 4.271590728 | 6.037444428 |
| 224227_s_at  | BDP1        | AF298152  | 55814     | Hs.258272                   | -1.765415523 | 8.11791235  | 9.883327873 |
| 212079_s_at  | MLL         | AA715041  | 4297      | Hs.258855                   | -1.765349339 | 6.828576721 | 8.59392606  |
| 224963_at    | SLC26A2     | AK025078  | 1836      | Hs.302738                   | -1.763907523 | 7.766078764 | 9.529986287 |
| 224775_at    | IWS1        | AW451291  | 55677     | Hs.469879                   | -1.763141196 | 9.227811166 | 10.99095236 |
| 236665_at    | CCDC18      | BF056459  | 343099    | Hs.716682                   | -1.760309698 | 7.579142855 | 9.339452553 |
| 213756_s_at  | HSF1        | AI393937  | 3297      | Hs.530227                   | -1.759296889 | 5.227576223 | 6.986873112 |
| 207177_at    | PTGFR       | NM_000959 | 5737      | Hs.654365                   | -1.757396186 | 7.528565927 | 9.285962113 |
| 1557388_at   | RTTN        | BC013774  | 25914     | Hs.654809                   | -1.756809208 | 6.441542063 | 8.198351272 |
| 212220_at    | PSME4       | AI972268  | 23198     | Hs.413801                   | -1.755588557 | 7.861153479 | 9.616742035 |
| 229179_at    | RUFY1       | BE677830  | 80230     | Hs.306769                   | -1.755497337 | 6.321390607 | 8.076887944 |

|              |              |           |                           |              |             |             |
|--------------|--------------|-----------|---------------------------|--------------|-------------|-------------|
| 242163_at    | THRAP3       | AW082726  | 9967 Hs.160211            | -1.755371463 | 5.297648367 | 7.05301983  |
| 1552622_s_at |              | BQ613856  |                           | -1.752659693 | 6.496122776 | 8.248782469 |
| 1569385_s_at | TET2         | BC019007  | 54790 Hs.367639           | -1.752481933 | 5.864567769 | 7.617049703 |
| 211548_s_at  | HPGD         | J05594    | 3248 Hs.596913            | 1.748878631  | 8.558018784 | 6.809140154 |
| 229643_at    | ITGA6        | AI857933  | 3655 Hs.133397            | -1.748649855 | 4.78773743  | 6.536423597 |
| 235030_at    | FAM55C       | BF969254  | 91775 Hs.595933           | -1.748327847 | 6.37479356  | 8.123121407 |
| 215250_at    | TMEM111      | AU147317  | 55831 Hs.475392           | -1.746571646 | 5.617020283 | 7.363591929 |
| 1316_at      | THRA         | X55005    | 7067 Hs.724               | -1.746314117 | 6.624591384 | 8.370905502 |
| 222834_s_at  | GNG12        | N32508    | 55970 Hs.431101           | -1.74627058  | 10.53489141 | 12.28116199 |
| 218700_s_at  | RAB7L1       | BC002585  | 8934 Hs.115325            | -1.741168004 | 7.482156677 | 9.223324681 |
| 213472_at    | HNRNPH1      | AI022387  | 3187 Hs.604001            | -1.740570965 | 5.053468367 | 6.794039332 |
| 233728_at    |              | AU148213  |                           | -1.739896399 | 4.509828308 | 6.249724708 |
| 242126_at    |              | T53962    |                           | -1.738954949 | 4.87980346  | 6.618758409 |
| 224687_at    | ANKIB1       | AB037807  | 54467 Hs.83293            | -1.736209902 | 8.153323344 | 9.889533246 |
| 211947_s_at  | BAT2D1       | AI359472  | 23215 Hs.494614           | -1.736029062 | 8.718387896 | 10.45441696 |
| 66053_at     | HNRNPUL2     | AI738452  | 221092 Hs.714969          | -1.735605943 | 7.590709304 | 9.326315246 |
| 212226_s_at  | PPAP2B       | AA628586  | 8613 Hs.405156, Hs.715848 | -1.734417589 | 6.743780265 | 8.478197854 |
| 202601_s_at  | HTATSF1      | AI373539  | 27336 Hs.204475           | -1.733846739 | 7.012464353 | 8.746311092 |
| 214985_at    | EXT1         | AF070571  | 2131 Hs.492618            | -1.732906628 | 4.877267814 | 6.610174443 |
| 228304_at    | RBM43        | BE674118  | 375287 Hs.302442          | -1.730071192 | 6.054860762 | 7.784931954 |
| 238961_s_at  | FNDCA3       | AA452239  | 22862 Hs.508010           | -1.729250449 | 6.681273181 | 8.41052363  |
| 216235_s_at  | EDNRA        | S81545    | 1909 Hs.183713            | -1.729138861 | 6.713169682 | 8.442308543 |
| 242492_at    | CLNS1A       | AA412065  | 1207 Hs.430733, Hs.598033 | -1.728351963 | 6.134377702 | 7.862729664 |
| 220409_at    | CAMSAP1      | NM_018627 | 157922 Hs.522493          | -1.727076483 | 5.418804198 | 7.145880681 |
| 1565928_at   |              | AW517148  |                           | -1.726876909 | 5.195181433 | 6.922058343 |
| 205121_at    | SGCB         | NM_000232 | 6443 Hs.438953            | -1.725191675 | 6.242006712 | 7.967198387 |
| 239689_at    |              | BF063236  |                           | 1.72446177   | 6.456260161 | 4.731798391 |
| 216868_s_at  | LOC100129651 | D13413    | 100129656                 | -1.72339478  | 4.69202306  | 6.415417841 |
| 239597_at    |              | AA993566  |                           | -1.72260655  | 4.755813714 | 6.478420264 |
| 203917_at    | CXADR        | NM_001338 | 1525 Hs.634837            | -1.722549964 | 7.623069283 | 9.345619247 |
| 203318_s_at  | ZNF148       | NM_021964 | 7707 Hs.592591            | -1.721964133 | 8.124005018 | 9.845969151 |
| 241214_at    |              | AI939471  |                           | -1.720583523 | 6.608819891 | 8.329403414 |
| 234000_s_at  | PTPLAD1      | AJ271091  | 51495 Hs.512973           | -1.719827837 | 8.479884027 | 10.19971186 |
| 1557581_x_at |              | BC027347  |                           | -1.719760085 | 4.534550553 | 6.254310638 |
| 239978_at    |              | BF109370  |                           | -1.719534334 | 4.746958782 | 6.466493117 |
| 223799_at    | KIAA1826     | AF253976  | 84437 Hs.266782           | -1.719187173 | 6.529692778 | 8.24887995  |
| 217189_s_at  | SMG7         | AL137800  | 9887 Hs.591463            | -1.717917981 | 5.552668044 | 7.270586025 |
| 238807_at    |              | AW973964  |                           | -1.715407206 | 5.421027367 | 7.136434573 |
| 241769_at    |              | AW962458  |                           | -1.715083674 | 4.596023267 | 6.311106941 |
| 224852_at    | TTC17        | BE964325  | 55761 Hs.696109           | -1.714833928 | 7.497876511 | 9.212710439 |
| 1553677_a_at | TIPRL        | NM_152902 | 261726 Hs.209431          | -1.712861352 | 6.679514207 | 8.392375559 |
| 201846_s_at  | RYBP         | NM_012234 | 23429 Hs.7910             | -1.712712846 | 7.81505546  | 9.527768305 |
| 226589_at    | TMEM192      | BE964222  | 201931 Hs.708090          | -1.710273305 | 5.533113882 | 7.243387187 |

|              |          |           |           |                             |              |             |             |
|--------------|----------|-----------|-----------|-----------------------------|--------------|-------------|-------------|
| 244799_s_at  |          | BE348796  |           |                             | -1.709098046 | 4.360434083 | 6.069532129 |
| 207700_s_at  | NCOA3    | NM_006534 | 8202      | Hs.592142                   | -1.708872674 | 8.46833978  | 10.17721245 |
| 229527_s_at  | OSBPL11  | AA074624  | 114885    | Hs.477440                   | -1.70676932  | 6.048208616 | 7.754977936 |
| 214464_at    | CDC42BPA | NM_003607 | 8476      | Hs.35433                    | -1.70676059  | 9.548355337 | 11.25511593 |
| 1554021_a_at | ZNF12    | AF505656  | 7559      | Hs.431471                   | -1.706188924 | 8.583636612 | 10.28982554 |
| 238519_at    | RSC1A1   | BG179828  | 6248      | Hs.145049, Hs.239459, Hs.70 | -1.702945368 | 7.628240457 | 9.331185824 |
| 223900_s_at  | PBRM1    | AF225870  | 55193     | Hs.189920                   | -1.702320931 | 5.834355293 | 7.536676224 |
| 224568_x_at  | MALAT1   | AW005982  | 378938    | Hs.642877, Hs.714394        | -1.702078894 | 11.21025908 | 12.91233797 |
| 212093_s_at  | MTUS1    | AI695017  | 57509     | Hs.7946                     | -1.701143132 | 4.612421843 | 6.313564975 |
| 235425_at    | SGOL2    | AW965339  | 151246    | Hs.655182                   | -1.699172792 | 8.907090711 | 10.6062635  |
| 228484_s_at  | FOXO1    | AI472322  | 2308      | Hs.370666                   | -1.698724944 | 6.27555627  | 7.974281214 |
| 211116_at    | SLC9A2   | AF073299  | 6549      | Hs.250083                   | -1.698628056 | 5.556198249 | 7.254826306 |
| 223793_at    | BAT2L    | BC002872  | 84726     | Hs.495349, Hs.703868        | -1.698310391 | 4.840717419 | 6.539027811 |
| 229728_at    |          | AI691075  |           |                             | -1.697684223 | 4.828857264 | 6.526541487 |
| 244292_at    |          | AL119491  |           |                             | -1.697182772 | 4.99619032  | 6.693373092 |
| 203914_x_at  | HPGD     | NM_000860 | 3248      | Hs.596913                   | 1.696796416  | 8.255909379 | 6.559112963 |
| 233376_at    |          | AF288406  |           |                             | -1.695935634 | 5.274907463 | 6.970843098 |
| 234939_s_at  | PHF12    | AL161953  | 57649     | Hs.714975                   | -1.694252376 | 5.223736288 | 6.917988664 |
| 215987_at    | RAPGEF2  | AV654984  | 9693      | Hs.113912                   | -1.694233872 | 5.152766312 | 6.847000184 |
| 238595_at    |          | AV702101  |           |                             | -1.6941921   | 5.691515568 | 7.385707669 |
| 1567224_at   | HMGA2    | U29113    | 8091      | Hs.505924                   | -1.69356198  | 4.537621394 | 6.231183374 |
| 214313_s_at  | EIF5B    | BE138647  | 9669      | Hs.158688                   | 1.693412814  | 9.248021359 | 7.554608545 |
| 244473_at    |          | R37637    |           |                             | -1.6917251   | 5.433935154 | 7.125660254 |
| 1567032_s_at | ZNF160   | X78928    | 90338     | Hs.655967                   | -1.691692963 | 4.831214742 | 6.522907705 |
| 231862_at    | CBX5     | AK023520  | 23468     | Hs.349283                   | -1.691685214 | 7.610011888 | 9.301697103 |
| 220369_at    | SMEK1    | NM_017936 | 55671     | Hs.533887                   | -1.691578661 | 6.49382098  | 8.185399641 |
| 1555608_at   | CAPRIN2  | AF326778  | 65981     | Hs.234355                   | -1.691193699 | 6.145095104 | 7.836288804 |
| 227315_x_at  | PROSC    | AA758214  | 11212     | Hs.304792, Hs.608177        | -1.690969265 | 6.769056993 | 8.460026258 |
| 241597_at    |          | W22152    |           |                             | -1.690146847 | 5.559227744 | 7.249374591 |
| 212605_s_at  |          | AK025759  |           |                             | -1.689903098 | 6.879741228 | 8.569644325 |
| 227349_at    | HELLS    | AI807356  | 3070      | Hs.655830                   | -1.689640675 | 7.030893253 | 8.720533928 |
| 1553304_at   | LSM14B   | NM_144703 | 149986    | Hs.105379                   | -1.686945608 | 5.758095431 | 7.445041038 |
| 222909_s_at  | BAG4     | AF111116  | 9530      | Hs.194726                   | -1.683324616 | 6.984376111 | 8.667700727 |
| 236417_at    |          | BE644770  |           |                             | -1.681507923 | 6.850524093 | 8.532032015 |
| 211000_s_at  | IL6ST    | AB015706  | 3572      | Hs.532082                   | -1.681342269 | 9.339499358 | 11.02084163 |
| 242320_at    |          | AI435586  |           |                             | -1.680786739 | 7.568984646 | 9.249771384 |
| 222634_s_at  | TBL1XR1  | AF314544  | 79718     | Hs.715537                   | -1.680608873 | 8.168416062 | 9.849024935 |
| 237095_at    | ASXL2    | AW628946  | 55252     | Hs.594386                   | -1.68049266  | 5.884543211 | 7.565035871 |
| 1554901_at   | GAFA1    | AF190748  | 100131227 | Hs.713290                   | -1.679405665 | 4.863891568 | 6.543297234 |
| 236649_at    | DTWD1    | AA907927  | 56986     | Hs.127432                   | -1.678389266 | 5.754961432 | 7.433350697 |
| 1555436_a_at | AFF4     | BC025700  | 27125     | Hs.519313, Hs.664840        | -1.676980187 | 7.658988308 | 9.335968495 |
| 236557_at    | ZBTB38   | AW085625  | 253461    | Hs.715534                   | -1.676307714 | 7.647555851 | 9.323863565 |
| 238883_at    |          | AW975051  |           |                             | -1.675205373 | 5.403270237 | 7.07847561  |

|                         |           |                      |        |                      |              |             |             |
|-------------------------|-----------|----------------------|--------|----------------------|--------------|-------------|-------------|
| 1554595_at              | SYMPK     | BC030214             | 8189   | Hs.515475            | -1.673709    | 5.688348034 | 7.362057034 |
| 1570108_at              |           | BC037848             |        |                      | -1.673552768 | 5.532138924 | 7.205691691 |
| 201942_s_at             | CPD       | D85390               | 1362   | Hs.446079            | -1.673381257 | 8.233706151 | 9.907087408 |
| 214139_at               | ARID4B    | AI051476             | 51742  | Hs.533633, Hs.575782 | -1.673089282 | 7.864048742 | 9.537138024 |
| 229753_at               | POU2F1    | BF511210             | 5451   | Hs.493649            | -1.672272859 | 6.532574401 | 8.20484726  |
| 201793_x_at             | SMG7      | BF509099             | 9887   | Hs.591463            | -1.672156319 | 8.967045878 | 10.6392022  |
| 201901_s_at             | YY1       | Z14077               | 7528   | Hs.388927            | -1.671108084 | 9.982888524 | 11.65399661 |
| 211973_at               |           | AW341200             |        |                      | -1.669694049 | 5.799156728 | 7.468850777 |
| 210109_at               | C7orf54   | AF191492             | 27099  | Hs.657377            | -1.669299611 | 5.26944434  | 6.938743951 |
| 227537_s_at             | SP3       | AW173024             | 6670   | Hs.531587            | -1.668444896 | 6.381270939 | 8.049715834 |
| 236368_at               | KIAA0368  | BF059292             | 23392  | Hs.368255            | -1.668128083 | 6.307920608 | 7.976048691 |
| 213457_at               | MFHAS1    | BF739959             | 9258   | Hs.379414            | -1.667287008 | 7.522360832 | 9.18964784  |
| 205917_at               | ZNF264    | NM_003417            | 9422   | Hs.515634            | -1.667143872 | 7.15575115  | 8.822895022 |
| 201730_s_at             | TPR       | BF110993             | 7175   | Hs.279640            | -1.66466437  | 9.658729125 | 11.32339349 |
| 229042_s_at             | DYNC1H1   | N26619               | 1778   | Hs.649497            | -1.664481834 | 7.645257349 | 9.309739182 |
| AFFX-HUMRGE/M10098_M_at |           | AFFX-HUMRGE/M10098_M |        |                      | -1.662890643 | 11.81781669 | 13.48070734 |
| 203085_s_at             | TGFB1     | BC000125             | 7040   | Hs.645227            | -1.662759273 | 7.348384661 | 9.011143933 |
| 212629_s_at             | PKN2      | AI633689             | 5586   | Hs.440833            | -1.662721048 | 9.14793951  | 10.81066056 |
| 1559728_at              | ZBTB40    | BF355863             | 9923   | Hs.418966            | -1.660725933 | 5.979246802 | 7.639972735 |
| 209305_s_at             | GADD45B   | AF078077             | 4616   | Hs.110571            | -1.660705319 | 10.42671323 | 12.08741855 |
| 230735_at               |           | AI653318             |        |                      | -1.660574432 | 5.357017597 | 7.017592029 |
| 229302_at               | TMEM178   | AA058832             | 130733 | Hs.40808             | 1.660400787  | 6.562213126 | 4.901812339 |
| 222933_at               | MORN1     | NM_024848            | 79906  | Hs.642701            | -1.659608731 | 5.323539257 | 6.983147988 |
| 222810_s_at             | RASAL2    | BF435513             | 9462   | Hs.549729, Hs.715627 | -1.656381883 | 7.667798999 | 9.324180882 |
| 226319_s_at             | THOC4     | AF047002             | 10189  | Hs.534385            | -1.655913146 | 9.471149661 | 11.12706281 |
| 1559883_s_at            | SAMHD1    | AF147427             | 25939  | Hs.580681            | -1.655061861 | 4.526886547 | 6.181948408 |
| 210457_x_at             | HMGGA1    | AF176039             | 3159   | Hs.518805, Hs.703764 | -1.65451885  | 7.67006723  | 9.32458608  |
| 1562442_a_at            | SSBP1     | BC008402             | 6742   | Hs.490394            | -1.654246413 | 5.113075442 | 6.767321855 |
| 216176_at               | HCRP1     | AK025343             | 387535 | Hs.675399            | -1.654246413 | 5.68832979  | 7.342576203 |
| 1555594_a_at            | MBNL1     | AF401998             | 4154   | Hs.478000, Hs.558914 | -1.651893351 | 7.309374274 | 8.961267625 |
| 210625_s_at             | AKAP1     | U34074               | 8165   | Hs.463506            | -1.649657105 | 6.382922463 | 8.032579568 |
| 217602_at               | PPIA      | AI191118             | 5478   | Hs.356331, Hs.598115 | -1.649574702 | 5.781312481 | 7.430887183 |
| 229966_at               | EWSR1     | AW089574             | 2130   | Hs.374477            | -1.64943029  | 6.636602036 | 8.286032326 |
| 238449_at               | LOC595101 | BG534511             | 595101 | Hs.654650, Hs.655267 | -1.648808835 | 5.505572855 | 7.15438169  |
| 1554178_a_at            | FAM126B   | BC039295             | 285172 | Hs.24701             | -1.648652919 | 7.704607493 | 9.353260412 |
| 226920_at               | CSNK1A1   | AW592437             | 1452   | Hs.529862, Hs.712555 | -1.647646061 | 9.645792853 | 11.29343891 |
| 228901_at               | CDK9      | AI040910             | 1025   | Hs.150423, Hs.706809 | -1.64696732  | 5.9514487   | 7.598416019 |
| 227513_s_at             | LRRFIP1   | AW027170             | 9208   | Hs.471779            | -1.64449165  | 7.600300784 | 9.244792433 |
| 235057_at               | ITCH      | AW089307             | 83737  | Hs.632272            | -1.644348029 | 8.264815335 | 9.909163364 |
| 206636_at               | RASA2     | NM_006506            | 5922   | Hs.655941            | -1.6428094   | 6.504326885 | 8.147136285 |
| 242137_at               |           | H10545               |        |                      | -1.641945739 | 4.895923623 | 6.537869361 |
| 211110_s_at             | AR        | AF162704             | 367    | Hs.496240            | -1.641020509 | 7.148035328 | 8.789055837 |
| 1555117_at              |           | BC008618             |        |                      | -1.6409236   | 4.574670737 | 6.215594337 |



|              |             |           |           |                      |              |             |             |
|--------------|-------------|-----------|-----------|----------------------|--------------|-------------|-------------|
| 222527_s_at  | RBM22       | AL538762  | 55696     | Hs.713564            | -1.64084565  | 8.603910079 | 10.24475573 |
| 213697_at    | HIPK3       | AW291829  | 10114     | Hs.201918            | -1.63952554  | 4.727191806 | 6.366717347 |
| 215992_s_at  | RAPGEF2     | AL117397  | 9693      | Hs.113912            | -1.63750516  | 5.805392734 | 7.442897894 |
| 213517_at    | PCBP2       | AW103422  | 5094      | Hs.546271            | -1.637385571 | 7.198837599 | 8.836223169 |
| 214445_at    | ELL2        | NM_012081 | 22936     | Hs.192221, Hs.708710 | -1.637122076 | 7.819649005 | 9.456771081 |
| 242805_at    |             | AW081636  |           |                      | -1.636650735 | 5.373261475 | 7.009912221 |
| 236932_s_at  | GATAD2A     | AW058619  | 54815     | Hs.709287            | -1.635374208 | 4.758075125 | 6.393449333 |
| 217489_s_at  | IL6R        | S72848    | 3570      | Hs.709210            | -1.634433631 | 4.690661468 | 6.325095099 |
| 232323_s_at  | TTC17       | AK026217  | 55761     | Hs.696109            | -1.632606122 | 8.666149625 | 10.29875575 |
| 227152_at    | C12orf35    | AI979334  | 55196     | Hs.445129            | -1.632580603 | 9.285201558 | 10.91778216 |
| 207143_at    | CDK6        | NM_001259 | 1021      | Hs.119882            | -1.632060028 | 6.037060849 | 7.669120877 |
| 241301_at    |             | AA694187  |           |                      | -1.630929621 | 5.391871385 | 7.022801006 |
| 207186_s_at  | BPTF        | NM_004459 | 2186      | Hs.444200            | -1.630740066 | 9.423844688 | 11.05458475 |
| 244774_at    | PHACTR2     | R81072    | 9749      | Hs.102471            | -1.630298175 | 6.828837274 | 8.459135449 |
| 219571_s_at  | ZNF12       | NM_016265 | 7559      | Hs.431471            | -1.627505808 | 8.213053665 | 9.840559472 |
| 205079_s_at  | MPDZ        | NM_003829 | 8777      | Hs.169378            | -1.626876177 | 7.12667222  | 8.753548397 |
| 222600_s_at  | UBA6        | AB014773  | 55236     | Hs.719086            | -1.626783728 | 7.542967312 | 9.16975104  |
| 1555526_a_at | 6-Sep       | AF403061  | 23157     | Hs.496666            | -1.626611477 | 5.403334375 | 7.029945852 |
| 214577_at    | MAP1B       | BG164365  | 4131      | Hs.335079            | -1.625266402 | 7.285527433 | 8.910793835 |
| 235341_at    | DNAJC3      | AL119957  | 5611      | Hs.59214             | -1.624473506 | 5.845692112 | 7.470165618 |
| 232940_s_at  | MLL3        | AK025911  | 58508     | Hs.647120            | -1.624450775 | 7.980460804 | 9.604911578 |
| 202247_s_at  | MTA1        | BE561596  | 9112      | Hs.525629            | -1.623564819 | 7.002171838 | 8.625736657 |
| 202975_s_at  | RHOBTB3     | N21138    | 22836     | Hs.445030            | -1.623175867 | 8.465466537 | 10.0886424  |
| 232238_at    | ASPM        | AK001380  | 259266    | Hs.121028            | -1.623072287 | 7.507901967 | 9.130974255 |
| 1567223_at   | HMGGA2      | U29113    | 8091      | Hs.505924            | -1.62267937  | 5.182790474 | 6.805469845 |
| 1565347_s_at | TFE3        | AY034078  | 7030      | Hs.274184            | -1.621671306 | 4.755921595 | 6.377592901 |
| 241797_at    |             | AI904095  |           |                      | -1.621429698 | 4.574383036 | 6.195812734 |
| 201679_at    | SRRT        | BE646076  | 51593     | Hs.111801            | -1.619897383 | 8.271682467 | 9.891579849 |
| 238329_at    | MPRIP       | BE545235  | 23164     | Hs.462341            | -1.618657481 | 6.843152853 | 8.461810334 |
| 242476_at    |             | AI436356  |           |                      | -1.612871262 | 5.35114462  | 6.964015882 |
| 221639_x_at  |             | AF068846  |           |                      | -1.611460303 | 7.482366276 | 9.093826579 |
| 205967_at    | HIST1H4C    | NM_003542 | 8364      | Hs.46423             | -1.611442618 | 8.809007729 | 10.42045035 |
| 1553122_s_at | RBAK        | NM_021163 | 57786     | Hs.396178            | -1.610646453 | 6.496098174 | 8.106744628 |
| 240395_at    | LOC10012872 | AI635761  | 100128727 | Hs.636145, Hs.713106 | -1.610401134 | 4.881217313 | 6.491618447 |
| 239486_at    |             | BG111636  |           |                      | -1.610264958 | 5.396884721 | 7.007149679 |
| 1553105_s_at | DSG2        | NM_001943 | 1829      | Hs.412597            | -1.608514925 | 7.609984949 | 9.218499874 |
| 241755_at    | UQCRC2      | AI961429  | 7385      | Hs.528803            | -1.608271325 | 4.624563832 | 6.232835157 |
| 1554159_a_at | ZMYND11     | BC034784  | 10771     | Hs.292265            | -1.607812053 | 8.215045865 | 9.822857918 |
| 239742_at    | TULP4       | H15278    | 56995     | Hs.486993            | -1.607759105 | 6.500061922 | 8.107821027 |
| 1558001_s_at | ARID5B      | BU171496  | 84159     | Hs.535297            | -1.60670119  | 4.551637111 | 6.158338301 |
| 235189_at    | NARG2       | BE780502  | 79664     | Hs.200943            | -1.602876182 | 6.308097509 | 7.910973691 |
| 210635_s_at  | KLHL20      | BC005253  | 27252     | Hs.495035            | -1.60216524  | 4.493388767 | 6.095554007 |
| 213015_at    | BBX         | BF448315  | 56987     | Hs.124366            | -1.602161728 | 9.462658463 | 11.06482019 |

|                         |           |                      |        |                             |              |             |             |
|-------------------------|-----------|----------------------|--------|-----------------------------|--------------|-------------|-------------|
| 1557987_at              | LOC641298 | BC042832             | 641298 | Hs.552700                   | -1.601318649 | 4.915891938 | 6.517210587 |
| 242477_at               | TTC39B    | BF056282             | 158219 | Hs.563630                   | 1.600680978  | 6.701665635 | 5.100984656 |
| 227740_at               | UHMK1     | AW173222             | 127933 | Hs.127310                   | -1.60064079  | 10.1205902  | 11.72123099 |
| 220038_at               |           | NM_013257            |        |                             | -1.600540955 | 6.156377839 | 7.756918794 |
| 210892_s_at             | GTF2I     | BC004472             | 2969   | Hs.647041                   | -1.600061641 | 7.133020309 | 8.73308195  |
| 1562387_at              | C5orf42   | BU189724             | 65250  | Hs.170993, Hs.586199, Hs.64 | -1.599912648 | 4.789704125 | 6.389616774 |
| 215545_at               |           | AK024185             |        |                             | -1.599676632 | 4.817915632 | 6.417592264 |
| 239370_at               |           | AW081982             |        |                             | 1.599660556  | 8.335038209 | 6.735377653 |
| 228367_at               | ALPK2     | BE551416             | 115701 | Hs.628152                   | 1.599403378  | 8.669735648 | 7.07033227  |
| 221188_s_at             | CIDEB     | NM_014430            | 27141  | Hs.642693, Hs.657595, Hs.70 | -1.596257678 | 4.918477754 | 6.514735432 |
| 237262_at               |           | AI912190             |        |                             | -1.596216854 | 6.263919567 | 7.860136421 |
| 231152_at               | INO80D    | AW452971             | 54891  | Hs.445036                   | -1.594687848 | 6.156422228 | 7.751110076 |
| 227175_at               |           | AI806486             |        |                             | -1.592752878 | 5.382111449 | 6.974864327 |
| 208859_s_at             | ATRX      | AI650257             | 546    | Hs.533526, Hs.645562, Hs.65 | -1.592139429 | 9.315934957 | 10.90807439 |
| 212279_at               | TMEM97    | BE779865             | 27346  | Hs.199695                   | -1.591997096 | 7.466583978 | 9.058581074 |
| 1560348_at              | RGNEF     | AK094713             | 64283  | Hs.482521                   | -1.590798544 | 6.701867142 | 8.292665687 |
| 230543_at               | USP9X     | AI761675             | 8239   | Hs.77578                    | -1.590269073 | 4.700612472 | 6.290881544 |
| 217373_x_at             | MDM2      | AJ276888             | 4193   | Hs.484551                   | -1.589779717 | 5.190523479 | 6.780303196 |
| 222387_s_at             | VPS35     | BG476669             | 55737  | Hs.454528                   | -1.587604106 | 8.216353881 | 9.803957986 |
| 236355_s_at             |           | AI076172             |        |                             | -1.587357344 | 5.415452543 | 7.002809887 |
| 223254_s_at             | G2E3      | AA887053             | 55632  | Hs.509008, Hs.605081        | -1.587272799 | 9.520899633 | 11.10817243 |
| 214972_at               | MGEA5     | AU144791             | 10724  | Hs.500842                   | -1.586802623 | 5.58388227  | 7.170684894 |
| 241425_at               | NUPL1     | AA769986             | 9818   | Hs.310453, Hs.719291        | -1.585073156 | 7.115567626 | 8.700640781 |
| 204999_s_at             | ATF5      | BC005174             | 22809  | Hs.9754                     | -1.582576102 | 8.273081643 | 9.855657745 |
| 214701_s_at             | FN1       | AJ276395             | 2335   | Hs.203717                   | -1.582474653 | 6.733005822 | 8.315480475 |
| 219158_s_at             | NARG1     | NM_025085            | 80155  | Hs.715706                   | -1.582025998 | 9.573793828 | 11.15581983 |
| 228623_at               |           | AI224133             |        |                             | -1.581324716 | 7.477893068 | 9.059217784 |
| 210529_s_at             | FAM115A   | BC000609             | 9747   | Hs.718446                   | -1.580710293 | 7.37159598  | 8.952306273 |
| 219024_at               | PLEKHA1   | NM_021622            | 59338  | Hs.643512                   | -1.579953003 | 7.450291051 | 9.030244054 |
| 221745_at               | DCAF7     | BE538424             | 10238  | Hs.410596                   | -1.579222282 | 5.896040303 | 7.475262586 |
| 229896_at               | GTF2I     | H41907               | 2969   | Hs.647041                   | -1.578988542 | 7.429939297 | 9.00892784  |
| 207213_s_at             | USP2      | NM_004205            | 9099   | Hs.524085                   | -1.578923914 | 4.683593894 | 6.262517808 |
| 208042_at               | AGGF1     | NM_013303            | 55109  | Hs.634849                   | -1.576890963 | 6.517080521 | 8.093971484 |
| 1555409_a_at            |           | AF218570             |        |                             | -1.576777183 | 5.790880398 | 7.367657581 |
| 244606_at               | ATP1A1    | AI264247             | 476    | Hs.371889                   | -1.574368485 | 4.965226728 | 6.539595212 |
| 1565701_at              |           | AL832624             |        |                             | -1.573880825 | 5.171356236 | 6.745237061 |
| 237761_at               | NEK6      | AI479332             | 10783  | Hs.197071                   | -1.573851983 | 5.540971876 | 7.114823859 |
| 214545_s_at             | PROSC     | NM_007198            | 11212  | Hs.304792, Hs.608177        | -1.572436025 | 7.010223321 | 8.582659346 |
| 239022_at               |           | AW090199             |        |                             | -1.571954002 | 6.397202807 | 7.969156809 |
| 217608_at               | SFRS12IP1 | AW408767             | 285672 | Hs.69504                    | -1.569478728 | 8.945444932 | 10.51492366 |
| 212106_at               | FAF2      | BF116183             | 23197  | Hs.484242                   | -1.569384623 | 8.946040969 | 10.51542559 |
| 230607_at               |           | T86874               |        |                             | -1.567437437 | 5.725161733 | 7.29259917  |
| AFFX-HSAC07/X00351_5_at | ACTB      | AFFX-HSAC07/X00351_5 | 60     | Hs.520640, Hs.708120        | -1.566512012 | 10.9898621  | 12.55637411 |

|              |           |                |        |                      |              |             |              |
|--------------|-----------|----------------|--------|----------------------|--------------|-------------|--------------|
| 202971_s_at  | DYRK2     | NM_006482      | 8445   | Hs.173135            | -1.565932523 | 5.822644851 | 7.388577374  |
| 234874_at    | ATE1      | AF079098       | 11101  | Hs.632080            | -1.565602834 | 5.45710473  | 7.022707564  |
| 240078_at    | SFRS8     | BG434474       | 6433   | Hs.308171            | -1.564846062 | 5.21614975  | 6.780995812  |
| 233800_at    |           | AA805082       |        |                      | -1.564726775 | 4.574048047 | 6.138774822  |
| 231403_at    | TRIO      | N21108         | 7204   | Hs.130031            | -1.563899427 | 7.80234217  | 9.366241597  |
| 226061_s_at  | NUDT3     | BE674245       | 11165  | Hs.188882            | -1.563617778 | 8.34039654  | 9.904014318  |
| 220292_at    | ZNF434    | NM_024340      | 54925  | Hs.592078            | -1.563472966 | 6.419597817 | 7.983070783  |
| 224730_at    | DCAF7     | AW575465       | 10238  | Hs.410596            | -1.563217963 | 6.864106909 | 8.427324872  |
| 227484_at    | SRGAP1    | BF508615       | 57522  | Hs.210751, Hs.593803 | -1.562976303 | 8.987298309 | 10.55027461  |
| 1557246_at   | KIDINS220 | AA992480       | 57498  | Hs.9873              | -1.562186746 | 6.037931206 | 7.600117952  |
| 214808_at    |           | AU147851       |        |                      | -1.561582181 | 7.513745685 | 9.075327866  |
| 231247_s_at  | LOC727820 | AI310647       | 727820 | Hs.547271            | -1.561457454 | 7.747604693 | 9.309062147  |
| 229703_at    | DLG1      | AA279428       | 1739   | Hs.292549            | -1.559583412 | 6.494668168 | 8.05425158   |
| 229272_at    | FNBP4     | AI083506       | 23360  | Hs.6834              | -1.558587947 | 4.642606175 | 6.201194122  |
| 202818_s_at  |           | AI344128       |        |                      | -1.558537684 | 9.947407726 | 11.50594541  |
| 230629_s_at  | EP400     | AI809582       | 57634  | Hs.699245            | -1.55837865  | 7.602412725 | 9.160791375  |
| 234159_at    |           | AK025182       |        |                      | -1.556077161 | 5.732004746 | 7.288081907  |
| 241798_at    |           | AI339930       |        |                      | -1.556027857 | 4.481774872 | 6.037802729  |
| 1560476_at   |           | AF290476       |        |                      | -1.555866026 | 4.58815252  | 6.144018546  |
| 1562110_at   |           | BC022892       |        |                      | -1.554978188 | 4.751578317 | 6.306556505  |
| 231904_at    | U2AF1     | AU122448       | 7307   | Hs.365116            | -1.554743827 | 7.676909874 | 9.231653701  |
| 1556687_a_at | CLDN10    | BE465772       | 9071   | Hs.534377, Hs.656580 | -1.553335382 | 4.506535971 | 6.059871353  |
| 1559038_at   |           | 2-Sep BC043180 | 4735   | Hs.335057, Hs.716403 | -1.551648533 | 6.451527299 | 8.003175832  |
| 220843_s_at  | DCAF13    | NM_014156      | 25879  | Hs.532265            | -1.550644891 | 5.128023102 | 6.678667994  |
| 240139_at    |           | AI949690       |        |                      | -1.550363518 | 5.496668164 | 7.047031681  |
| 233827_s_at  | SUPT16H   | AK024072       | 11198  | Hs.213724            | -1.549329491 | 10.12125899 | 11.670588848 |
| 231169_at    |           | N29877         |        |                      | -1.548445781 | 8.551428279 | 10.09987406  |
| 229541_at    |           | BE669703       |        |                      | -1.548143523 | 5.59849541  | 7.146638933  |
| 224943_at    | BTBD7     | AI580162       | 55727  | Hs.525549            | -1.547238533 | 6.734806445 | 8.282044978  |
| 235003_at    | UHMK1     | AI249980       | 127933 | Hs.127310            | -1.547110613 | 9.546532588 | 11.0936432   |
| 1556051_a_at | BICD1     | CA777994       | 636    | Hs.505202            | -1.545969894 | 6.758483477 | 8.30445337   |
| 1560026_at   |           | BC037944       |        |                      | -1.545815307 | 4.954246615 | 6.500061922  |
| 243874_at    | LPP       | AI079544       | 4026   | Hs.444362            | -1.545518969 | 5.841949633 | 7.387468602  |
| 228995_at    | CAMSAP1   | BF434985       | 157922 | Hs.522493            | -1.545152598 | 5.239568917 | 6.784721515  |
| 208178_x_at  | TRIO      | NM_007118      | 7204   | Hs.130031            | -1.544522364 | 7.782357194 | 9.326879558  |
| 216509_x_at  | MLLT10    | AF060938       | 8028   | Hs.30385             | -1.544402384 | 6.133298664 | 7.677701048  |
| 211089_s_at  | NEK3      | Z25434         | 4752   | Hs.409989            | -1.542397499 | 5.182151471 | 6.724548971  |
| 200920_s_at  | BTG1      | AL535380       | 694    | Hs.255935            | -1.541322291 | 10.80293113 | 12.34425342  |
| 1559614_at   | FLJ38773  | AK096092       | 284808 |                      | -1.540897402 | 4.772173957 | 6.313071359  |
| 223997_at    | FNIP1     | BC001956       | 96459  | Hs.591273            | -1.539284239 | 6.232713456 | 7.771997694  |
| 209052_s_at  | WHSC1     | BF111870       | 7468   | Hs.113876            | -1.538766316 | 6.22139469  | 7.760161005  |
| 214295_at    | KIAA0485  | AW129056       | 57235  | Hs.604754            | -1.538296205 | 5.904947793 | 7.443243998  |
| 215886_x_at  | USP12     | AF022790       | 219333 | Hs.42400             | -1.5378038   | 5.479306194 | 7.017109994  |

|              |          |           |        |                      |              |             |             |
|--------------|----------|-----------|--------|----------------------|--------------|-------------|-------------|
| 239232_at    | MSI2     | AA521410  | 124540 | Hs.658922            | -1.536766816 | 4.887998857 | 6.424765673 |
| 1553322_s_at | TEAD1    | NM_021961 | 7003   | Hs.655331            | -1.536499164 | 5.615454713 | 7.151953877 |
| 243318_at    | DCAF8    | AI208342  | 50717  | Hs.632447            | -1.536468634 | 7.487032644 | 9.023501278 |
| 211832_s_at  | MDM2     | AF201370  | 4193   | Hs.484551            | -1.536194922 | 5.073586184 | 6.609781106 |
| 227631_at    | ABI2     | BF058849  | 10152  | Hs.471156            | -1.536014451 | 5.251966718 | 6.787981169 |
| 220085_at    | HELLS    | NM_018063 | 3070   | Hs.655830            | -1.535923463 | 8.711426786 | 10.24735025 |
| 233566_at    | LOC84856 | AK024638  | 84856  | Hs.55977             | -1.53448797  | 4.843023478 | 6.377511448 |
| 236496_at    | DEGS2    | AW006352  | 123099 | Hs.159643            | 1.531864925  | 6.211209146 | 4.679344221 |
| 222087_at    | PVT1     | AW451806  | 5820   | Hs.133107, Hs.675281 | -1.531750014 | 6.763945407 | 8.295695421 |
| 243474_at    |          | W87425    |        |                      | -1.531356477 | 4.665908159 | 6.197264637 |
| 1552656_s_at | UHMK1    | NM_144624 | 127933 | Hs.127310            | -1.528918891 | 4.713153357 | 6.242072248 |
| 202723_s_at  | FOXO1    | AW117498  | 2308   | Hs.370666            | -1.528537637 | 9.10178472  | 10.63032236 |
| 235409_at    | MGA      | AU149225  | 23269  | Hs.187569            | -1.528136486 | 7.797906871 | 9.326043357 |
| 202323_s_at  | ACBD3    | AI636775  | 64746  | Hs.520207            | -1.52691938  | 5.935423501 | 7.462342881 |
| 236836_at    |          | BE503070  |        |                      | -1.526329386 | 5.646653133 | 7.172982519 |
| 208297_s_at  | EVI5     | NM_005665 | 7813   | Hs.594434            | -1.526308932 | 6.85661164  | 8.382920571 |
| 1552536_at   | VTI1A    | NM_145206 | 143187 | Hs.194554            | -1.52627152  | 6.309467082 | 7.835738601 |
| 224829_at    | CPEB4    | AA772278  | 80315  | Hs.127126            | -1.526268621 | 6.209661062 | 7.735929684 |
| 210866_s_at  | CNOT4    | AF180475  | 4850   | Hs.490224            | -1.526145049 | 5.752403015 | 7.278548064 |
| 1554574_a_at | CYB5R3   | AF361370  | 1727   | Hs.700572            | -1.525671699 | 7.640723462 | 9.166395161 |
| 205854_at    | TULP3    | AK024246  | 7289   | Hs.655333            | -1.525006127 | 7.662266518 | 9.187272645 |
| 229274_at    | GNAS     | AI693143  | 2778   | Hs.125898, Hs.694849 | -1.523014757 | 5.166007683 | 6.68902244  |
| 236561_at    | TGFBR1   | AV700621  | 7046   | Hs.494622            | -1.522340018 | 4.950899183 | 6.473239201 |
| 1554213_at   | ARHGEF10 | BC036809  | 9639   | Hs.98594             | -1.522040791 | 5.669148615 | 7.191189406 |
| 206521_s_at  | GTF2A1   | NM_015859 | 2957   | Hs.592334, Hs.593630 | -1.521671421 | 7.647555851 | 9.169227272 |
| 239901_at    |          | BF642798  |        |                      | -1.520138913 | 4.847300895 | 6.367439808 |
| 1557029_at   |          | BC035392  |        |                      | -1.520025662 | 7.767170598 | 9.287196259 |
| 238611_at    |          | AI906424  |        |                      | -1.5185577   | 6.034125649 | 7.55268335  |
| 210436_at    | CCT8     | BC005220  | 10694  | Hs.125113            | -1.518314887 | 4.825768618 | 6.344083506 |
| 214447_at    | ETS1     | NM_005238 | 2113   | Hs.369438            | -1.517432016 | 6.574048145 | 8.09148016  |
| 244677_at    |          | AA416756  |        |                      | -1.517033252 | 6.900854066 | 8.417887318 |
| 232569_at    |          | AK024255  |        |                      | -1.515397534 | 6.632141727 | 8.147539261 |
| 1558775_s_at | NSMAF    | AU142380  | 8439   | Hs.372000            | -1.51512519  | 5.782679512 | 7.297804702 |
| 1566001_at   |          | AK096064  |        |                      | -1.515053466 | 4.560597413 | 6.075650879 |
| 228079_at    | C3orf58  | AI343351  | 205428 | Hs.288954            | 1.514109777  | 6.171380507 | 4.65727073  |
| 231592_at    |          | AV646335  |        |                      | -1.5137031   | 7.922317886 | 9.436020986 |
| 230628_at    | EP400    | AI809582  | 57634  | Hs.699245            | -1.513210896 | 5.868891626 | 7.382102522 |
| 244383_at    |          | AI283051  |        |                      | -1.513051453 | 5.730815198 | 7.243866651 |
| 242223_at    |          | AA505323  |        |                      | -1.512677791 | 4.869660233 | 6.382338024 |
| 206767_at    | RBMS3    | NM_014483 | 27303  | Hs.696468            | -1.512123705 | 6.176872731 | 7.688996436 |
| 225957_at    | C5orf41  | AI307750  | 153222 | Hs.484195            | -1.510848196 | 7.613738961 | 9.124587157 |
| 232264_at    |          | AK022204  |        |                      | -1.510767573 | 7.093365975 | 8.604133548 |
| 210743_s_at  | CDC14A   | AF064103  | 8556   | Hs.127411            | -1.510288937 | 4.72797043  | 6.238259367 |

|              |           |           |        |                      |              |             |             |
|--------------|-----------|-----------|--------|----------------------|--------------|-------------|-------------|
| 230742_at    | RBM6      | AA742596  | 10180  | Hs.439480            | -1.510243792 | 6.557136759 | 8.067380552 |
| 213755_s_at  | SKI       | BF431501  | 6497   | Hs.663133            | -1.508263216 | 8.512464761 | 10.02072798 |
| 233560_x_at  | MCM8      | AA370141  | 84515  | Hs.631506            | -1.507878603 | 5.740177419 | 7.248056023 |
| 222667_s_at  | ASH1L     | AI806500  | 55870  | Hs.491060            | -1.507318913 | 8.075282085 | 9.582600998 |
| 224676_at    | TMED4     | AI472339  | 222068 | Hs.598832, Hs.715273 | -1.506790967 | 8.638678251 | 10.14546922 |
| 213668_s_at  | SOX4      | AI989477  | 6659   | Hs.643910            | -1.506170635 | 6.681957202 | 8.188127837 |
| 1555515_a_at | FAM189B   | BC008854  | 10712  | Hs.348308            | -1.505632935 | 4.617835909 | 6.123468844 |
| 242514_at    |           | R16900    |        |                      | -1.505144741 | 4.633150786 | 6.138295527 |
| 229191_at    | TBCD      | AL096745  | 6904   | Hs.464391            | 1.505002463  | 6.177311472 | 4.672309009 |
| 1569525_s_at |           | BC040855  |        |                      | -1.504975634 | 5.726738445 | 7.231714079 |
| 241625_at    | LOC389834 | BE221330  | 389834 | Hs.595418            | -1.504951527 | 6.953976646 | 8.458928173 |
| 227918_s_at  | ZYG11B    | N21008    | 79699  | Hs.476280            | -1.504909271 | 4.885750924 | 6.390660196 |
| 239339_at    |           | AW820262  |        |                      | -1.501364398 | 5.421628729 | 6.922993127 |
| 238938_at    |           | AI674059  |        |                      | -1.501225647 | 4.649620293 | 6.15084594  |
| 230503_at    |           | AA151917  |        |                      | -1.499797518 | 5.85875957  | 7.358557088 |
| 1560926_at   |           | AF085924  |        |                      | -1.499374782 | 6.999710641 | 8.499085423 |
| 204073_s_at  | C11orf9   | NM_013279 | 745    | Hs.473109            | 1.499349357  | 8.132948576 | 6.633599219 |
| 211949_s_at  | NOLC1     | AI355279  | 9221   | Hs.523238            | -1.499302141 | 8.492454364 | 9.991756505 |
| 212451_at    | SECISBP2L | N52532    | 9728   | Hs.9997              | -1.499177002 | 6.812856977 | 8.312033979 |
| 234811_at    | CENPN     | AK026313  | 55839  | Hs.55028             | -1.499079187 | 5.169567791 | 6.668646978 |
| 220617_s_at  | ZNF532    | NM_018181 | 55205  | Hs.529023, Hs.607676 | -1.499028434 | 9.946981952 | 11.44601039 |
| 1560492_at   |           | BC014174  |        |                      | -1.498968232 | 6.199060457 | 7.698028689 |
| 244766_at    |           | BG180003  |        |                      | -1.498579053 | 4.873797587 | 6.37237664  |
| 221705_s_at  | SIKE1     | BC005934  | 80143  | Hs.709277            | -1.498236359 | 9.479720081 | 10.97795644 |
| 204426_at    | TMED2     | NM_006815 | 10959  | Hs.592682, Hs.75914  | -1.497917979 | 8.555913177 | 10.05383116 |
| 225100_at    | FBXO45    | BF590021  | 200933 | Hs.169815            | -1.497273556 | 7.465509391 | 8.962782947 |
| 241965_at    |           | BF589232  |        |                      | -1.497231006 | 6.060926151 | 7.558157157 |
| 238800_s_at  | ZCCHC6    | AA776496  | 79670  | Hs.655162            | -1.496570129 | 7.43615132  | 8.932721449 |
| 243593_s_at  |           | BF003018  |        |                      | -1.496101193 | 5.279357434 | 6.775458626 |
| 235757_at    |           | AA814006  |        |                      | -1.495800758 | 5.300057947 | 6.795858705 |
| 238013_at    | PLEKHA2   | BF347859  | 59339  | Hs.369123            | -1.494354813 | 4.898469108 | 6.392823921 |
| 235730_at    |           | AA830545  |        |                      | -1.493939486 | 4.677146868 | 6.171086354 |
| 232465_at    |           | AK021749  |        |                      | -1.492805579 | 4.953514725 | 6.446320304 |
| 209655_s_at  | TMEM47    | AI803181  | 83604  | Hs.8769              | -1.492770827 | 8.428834917 | 9.921605744 |
| 244546_at    | CYCS      | AI760495  | 54205  | Hs.437060, Hs.617193 | -1.492218273 | 4.574613374 | 6.066831647 |
| 211016_x_at  | HSPA4     | BC002526  | 3308   | Hs.90093             | -1.492079116 | 9.165324983 | 10.6574041  |
| 1561884_at   | CEPT1     | AL833102  | 10390  | Hs.363572, Hs.636850 | -1.491941238 | 5.606797219 | 7.098738457 |
| 204315_s_at  | GTSE1     | AI340239  | 51512  | Hs.386189            | -1.491849917 | 8.553699239 | 10.04554916 |
| 216627_s_at  | B4GALT1   | U10473    | 2683   | Hs.272011            | -1.491607466 | 4.802099016 | 6.293706482 |
| 201340_s_at  | ENC1      | AF010314  | 8507   | Hs.104925            | -1.491600394 | 5.668309542 | 7.159909936 |
| 208879_x_at  | PRPF6     | BG469030  | 24148  | Hs.31334             | -1.491495338 | 7.424424484 | 8.915919822 |
| 1567015_at   | NFE2L2    | AF323119  | 4780   | Hs.715540            | -1.490292001 | 8.598734954 | 10.08902695 |
| 211965_at    | ZFP36L1   | BE620915  | 677    | Hs.707091, Hs.85155  | -1.490050038 | 9.212626696 | 10.70267673 |

|              |          |           |        |                             |              |             |             |
|--------------|----------|-----------|--------|-----------------------------|--------------|-------------|-------------|
| 201164_s_at  | PUM1     | BG474429  | 9698   | Hs.281707                   | -1.490018917 | 10.26249955 | 11.75251846 |
| 217966_s_at  | FAM129A  | NM_022083 | 116496 | Hs.518662                   | -1.488960581 | 7.394804939 | 8.88376552  |
| 1560752_at   | FBXW2    | AK025767  | 26190  | Hs.494985                   | -1.488804267 | 4.577108825 | 6.065913091 |
| 215547_at    | TSC22D2  | AF201291  | 9819   | Hs.665220, Hs.715600        | -1.488086803 | 5.289072584 | 6.777159387 |
| 1569302_at   | KIAA1731 | BC017394  | 85459  | Hs.458418                   | -1.487880628 | 7.164420604 | 8.652301232 |
| 1553185_at   | RASEF    | NM_152573 | 158158 | Hs.657750                   | -1.487083101 | 9.568184423 | 11.05526752 |
| 217626_at    |          | BF508244  |        |                             | -1.486118899 | 8.639771663 | 10.12589056 |
| 204270_at    | SKI      | AI568728  | 6497   | Hs.663133                   | -1.485737255 | 9.77021325  | 11.2559505  |
| 1570264_at   |          | BC017949  |        |                             | -1.48511548  | 4.695076956 | 6.180192436 |
| 224754_at    | SP1      | BG431266  | 6667   | Hs.620754, Hs.649191        | -1.485105785 | 8.932065042 | 10.41717083 |
| 229171_at    | MGC16385 | AI761337  | 92806  | Hs.513832                   | -1.483723712 | 4.531834324 | 6.015558036 |
| 71933_at     | WNT6     | AI218134  | 7475   | Hs.29764                    | 1.483640303  | 6.560279395 | 5.076639092 |
| 202821_s_at  | LPP      | AL044018  | 4026   | Hs.444362                   | -1.48288668  | 8.223855207 | 9.706741887 |
| 233349_at    | TLK2     | AI800481  | 11011  | Hs.445078                   | -1.482203599 | 5.789401252 | 7.271604851 |
| 226587_at    | SNRPN    | BE783065  | 6638   | Hs.555970, Hs.564847, Hs.57 | -1.481091972 | 4.544297825 | 6.025389797 |
| 220729_at    |          | NM_014092 |        |                             | -1.481060984 | 6.417260536 | 7.898321519 |
| 213548_s_at  | CDV3     | BG257762  | 55573  | Hs.518265                   | -1.480630637 | 8.302086541 | 9.782717178 |
| 214805_at    | EIF4A1   | U79273    | 1973   | Hs.129673                   | -1.479988424 | 6.500061922 | 7.980050346 |
| 219496_at    | ANKRD57  | NM_023016 | 65124  | Hs.355455                   | -1.479341403 | 8.365262873 | 9.844604276 |
| 1568853_at   |          | BC038201  |        |                             | 1.479237444  | 9.08174552  | 7.602508076 |
| 1566809_a_at |          | AK097593  |        |                             | -1.478923564 | 5.035404324 | 6.514327888 |
| 241595_at    |          | BF223007  |        |                             | -1.478252645 | 5.864806644 | 7.343059289 |
| 243558_at    |          | AI040122  |        |                             | -1.476734822 | 4.863202131 | 6.339936953 |
| 204463_s_at  | EDNRA    | AU118882  | 1909   | Hs.183713                   | -1.475201751 | 5.703621889 | 7.17882364  |
| 208591_s_at  | PDE3B    | NM_000922 | 5140   | Hs.445711                   | -1.475099748 | 4.978744481 | 6.453844229 |
| 239227_at    |          | AW182675  |        |                             | -1.474776368 | 5.888339552 | 7.36311592  |
| 207754_at    | RASSF8   | NM_007211 | 11228  | Hs.696433                   | -1.474688045 | 6.340369978 | 7.815058023 |
| 220946_s_at  | SETD2    | NM_014159 | 29072  | Hs.517941                   | -1.474299633 | 8.425029569 | 9.899329202 |
| 1554096_a_at | RBM33    | BC011923  | 155435 | Hs.591815                   | -1.473483533 | 6.79945552  | 8.272939053 |
| 1555562_a_at | ZCCHC7   | BC022434  | 84186  | Hs.654700                   | -1.472850998 | 8.137674477 | 9.610525476 |
| 236254_at    | VPS13B   | BE048857  | 157680 | Hs.191540                   | -1.472823462 | 8.076666426 | 9.549489888 |
| 242143_at    |          | BE674964  |        |                             | -1.47039605  | 4.706490315 | 6.176886364 |
| 223399_x_at  | PBRM1    | AF197569  | 55193  | Hs.189920                   | -1.469841658 | 4.981964389 | 6.451806047 |
| 217951_s_at  | PHF3     | AW189430  | 23469  | Hs.348921                   | -1.467907271 | 8.539569227 | 10.0074765  |
| 236216_at    |          | AA598661  |        |                             | -1.467839618 | 5.860533501 | 7.328373119 |
| 210214_s_at  | BMPR2    | U25110    | 659    | Hs.471119                   | -1.46735355  | 6.579636554 | 8.046990103 |
| 205798_at    | IL7R     | NM_002185 | 3575   | Hs.591742, Hs.635723        | -1.467281898 | 5.648642903 | 7.115924801 |
| 203626_s_at  | SKP2     | NM_005983 | 6502   | Hs.23348                    | -1.467102244 | 6.396719829 | 7.863822073 |
| 206829_x_at  | ZNF430   | NM_025189 | 80264  | Hs.466289                   | -1.464824461 | 6.535711102 | 8.000535563 |
| 232152_at    | C6orf182 | BE567344  | 285753 | Hs.632616                   | -1.464566902 | 5.037673624 | 6.502240527 |
| 226320_at    | THOC4    | AF047002  | 10189  | Hs.534385                   | -1.464462763 | 10.18134413 | 11.64580689 |
| 203803_at    | PCYOX1   | N45309    | 51449  | Hs.567502                   | -1.462493201 | 6.763049563 | 8.225542764 |
| 227384_s_at  |          | AW340595  |        |                             | -1.461822814 | 8.119553416 | 9.581376229 |

|              |           |           |        |                             |              |             |             |
|--------------|-----------|-----------|--------|-----------------------------|--------------|-------------|-------------|
| 235660_at    |           | AW970002  |        |                             | -1.461424746 | 5.253006805 | 6.714431551 |
| 1565715_at   | FUS       | BE930017  | 2521   | Hs.513522                   | -1.460700697 | 9.038345963 | 10.49904666 |
| 1554721_a_at | TAF2      | AF040701  | 6873   | Hs.122752                   | -1.458613129 | 8.065264646 | 9.523877774 |
| 237018_at    |           | AI051967  |        |                             | -1.456779931 | 5.604607994 | 7.061387925 |
| 215188_at    | STK24     | AF339785  | 8428   | Hs.508514, Hs.713712        | -1.455300109 | 4.714740835 | 6.170040944 |
| 235055_x_at  | MUC4      | BF913667  | 4585   | Hs.369646                   | 1.454776845  | 6.466925956 | 5.012149111 |
| 227956_at    | ITPRIPL2  | AI458417  | 162073 | Hs.530899, Hs.648523        | -1.454769929 | 7.351867258 | 8.806637187 |
| 239946_at    |           | AA776723  |        |                             | -1.453766921 | 5.989208656 | 7.442975577 |
| 244784_at    | DHX57     | T61977    | 90957  | Hs.468226                   | -1.453758018 | 4.671951234 | 6.125709251 |
| 215310_at    | APC       | AF038181  | 324    | Hs.158932                   | -1.453573518 | 4.622165258 | 6.075738776 |
| 1567014_s_at | NFE2L2    | AF323119  | 4780   | Hs.715540                   | -1.453019565 | 8.045046119 | 9.498065683 |
| 209677_at    | PRKCI     | L18964    | 5584   | Hs.478199                   | -1.451249552 | 5.523149964 | 6.974399516 |
| 207686_s_at  | CASP8     | NM_001228 | 841    | Hs.599762                   | -1.44944598  | 5.33563883  | 6.78508481  |
| 241413_at    |           | W80457    |        |                             | -1.448721606 | 4.783021515 | 6.231743122 |
| 1554084_a_at | NOL9      | BF969522  | 79707  | Hs.59425                    | -1.448545554 | 6.649958655 | 8.098504209 |
| 238855_at    | AHNAK     | BF816551  | 79026  | Hs.502756                   | -1.447875478 | 5.323539257 | 6.771414734 |
| 237502_at    | CRLS1     | BE671045  | 54675  | Hs.224764                   | -1.447745653 | 5.574488477 | 7.02223413  |
| 1564907_s_at |           | AJ224167  |        |                             | -1.447246116 | 6.37237664  | 7.819622757 |
| 215198_s_at  | CALD1     | AU147402  | 800    | Hs.490203                   | -1.447202306 | 5.79125867  | 7.238460975 |
| 216057_at    | RAB3GAP2  | AK021928  | 25782  | Hs.654849, Hs.708165        | -1.445855949 | 4.580392823 | 6.026248773 |
| 1563321_s_at | MLLT10    | AF272384  | 8028   | Hs.30385                    | -1.445773936 | 6.68675814  | 8.132532077 |
| 237867_s_at  | PID1      | AI142544  | 55022  | Hs.715695                   | -1.445620883 | 7.783326655 | 9.228947538 |
| 225345_s_at  |           | AU155376  |        |                             | -1.444484274 | 7.541853271 | 8.986337545 |
| 214682_at    | LOC399491 | AK023376  | 399491 | Hs.648395, Hs.656655        | -1.444425835 | 6.488723627 | 7.933149462 |
| 220220_at    | LRRC37A4  | NM_018001 | 55073  | Hs.663277, Hs.675446        | -1.443798548 | 6.768966322 | 8.212764869 |
| 228691_at    | BICD1     | AI694946  | 636    | Hs.505202                   | -1.443075728 | 5.769906096 | 7.212981824 |
| 223323_x_at  | TRPM7     | BE044733  | 54822  | Hs.512894                   | -1.442710502 | 7.895066364 | 9.337776866 |
| 217069_at    | MLL4      | AF105279  | 9757   | Hs.676457, Hs.92236         | 1.44216835   | 6.154223498 | 4.712055148 |
| 205018_s_at  | MBNL2     | NM_005757 | 10150  | Hs.657347                   | -1.440253388 | 6.489892957 | 7.930146345 |
| 219628_at    | ZMAT3     | NM_022470 | 64393  | Hs.386299                   | -1.440020642 | 8.815952674 | 10.25597332 |
| 222955_s_at  |           | AF168713  |        |                             | -1.439962031 | 8.161326672 | 9.601288703 |
| 1556204_a_at | ZNF814    | AK096401  | 730051 | Hs.634143, Hs.669024, Hs.71 | -1.439170386 | 4.797385136 | 6.236555522 |
| 223899_at    | PBRM1     | AF225870  | 55193  | Hs.189920                   | -1.438432641 | 4.621741996 | 6.060174637 |
| 225961_at    | KLHDC5    | AI334297  | 57542  | Hs.505104                   | -1.436941579 | 8.121330046 | 9.558271625 |
| 215898_at    | TTLL5     | AK021879  | 23093  | Hs.709609                   | -1.436560171 | 4.62445267  | 6.061012841 |
| 242972_at    |           | AI022648  |        |                             | -1.435187554 | 5.526588046 | 6.9617756   |
| 1555434_a_at | SLC39A14  | BC015770  | 23516  | Hs.491232                   | -1.434329596 | 5.451304734 | 6.88563433  |
| 226999_at    | RNPC3     | AL137730  | 55599  | Hs.632423, Hs.632430        | -1.434063566 | 5.922424016 | 7.356487582 |
| 213556_at    | LOC390940 | BE673445  | 390940 | Hs.22049                    | 1.43372186   | 8.464941333 | 7.031219474 |
| 239414_at    |           | BF942260  |        |                             | -1.432951607 | 7.329182622 | 8.762134229 |
| 222007_s_at  | FKBP8     | N95418    | 23770  | Hs.173464                   | -1.430696208 | 5.159450616 | 6.590146823 |
| 223984_s_at  | NUPL1     | BC001104  | 9818   | Hs.310453, Hs.719291        | -1.43003904  | 7.696282192 | 9.126321232 |
| 202046_s_at  | GRLF1     | NM_004491 | 2909   | Hs.509447                   | -1.429546959 | 7.183356228 | 8.612903186 |

|              |             |           |                                 |              |             |             |
|--------------|-------------|-----------|---------------------------------|--------------|-------------|-------------|
| 240886_at    | CASR        | W37989    | 846 Hs.435615                   | 1.428879341  | 6.400733931 | 4.97185459  |
| 224216_at    |             | AF222858  |                                 | -1.427721246 | 6.735577244 | 8.16329849  |
| 201070_x_at  | SF3B1       | AI739389  | 23451 Hs.632554                 | -1.426844521 | 9.776500912 | 11.20334543 |
| 212070_at    | GPR56       | AL554008  | 9289 Hs.513633                  | 1.426547627  | 10.00448548 | 8.577937854 |
| 219980_at    | C4orf29     | NM_025097 | 80167 Hs.445817                 | -1.42649449  | 6.181756365 | 7.608250855 |
| 241824_at    |             | AA019641  |                                 | -1.426409215 | 5.711901776 | 7.138310992 |
| 239348_at    |             | AI285970  |                                 | -1.425554915 | 5.70644132  | 7.131996236 |
| 224254_x_at  |             | AF116695  |                                 | -1.425368006 | 4.699318695 | 6.124686701 |
| 1553186_x_at | RASEF       | NM_152573 | 158158 Hs.657750                | -1.423460608 | 9.063446524 | 10.48690713 |
| 235582_at    | E2F2        | BG388715  | 1870 Hs.194333                  | -1.422617865 | 5.936518534 | 7.359136399 |
| 1558078_at   |             | BQ219651  |                                 | -1.421840632 | 5.545265116 | 6.967105747 |
| 239783_at    |             | AV699637  |                                 | -1.421489247 | 6.309783278 | 7.731272525 |
| 1559458_at   |             | L04489    |                                 | -1.421319423 | 4.693522563 | 6.114841986 |
| 209013_x_at  | TRIO        | AF091395  | 7204 Hs.130031                  | -1.421199664 | 7.99632984  | 9.417529504 |
| 209996_x_at  | PCM1        | AA931266  | 5108 Hs.491148                  | -1.420983895 | 6.841472601 | 8.262456496 |
| 211205_x_at  | PIP5K1A     | U78577    | 8394 Hs.655131, Hs.707569       | -1.41989075  | 6.409886465 | 7.829777215 |
| 236375_at    |             | AA516469  |                                 | -1.419301506 | 5.009264132 | 6.428565638 |
| 232784_at    |             | R42604    |                                 | -1.419086442 | 6.828068078 | 8.24715452  |
| 213577_at    | SQLE        | AA639705  | 6713 Hs.71465                   | -1.418774298 | 9.076993715 | 10.49576801 |
| 240232_at    |             | AA503803  |                                 | -1.417652213 | 5.723074018 | 7.140726231 |
| 215078_at    | SOD2        | AL050388  | 6648 Hs.487046                  | -1.41760267  | 9.331228061 | 10.74883073 |
| 228613_at    | RAB11FIP3   | BF183535  | 9727 Hs.531642                  | -1.417071681 | 7.507526113 | 8.924597794 |
| 217182_at    | MUC5AC      | Z34282    | 4586 Hs.534332, Hs.558950       | 1.416832876  | 6.924038188 | 5.507205312 |
| 232592_at    |             | AU146731  |                                 | -1.416618971 | 6.182299088 | 7.598918059 |
| 243117_at    |             | AL038973  |                                 | 1.416417505  | 8.206799525 | 6.790382021 |
| 1557961_s_at | LOC10012798 | BG492376  | 100127983                       | -1.416171902 | 7.489339697 | 8.905511599 |
| 1569202_x_at |             | BF847120  |                                 | -1.416113341 | 4.668961972 | 6.085075313 |
| 1555384_a_at | LARP4       | BC022377  | 113251 Hs.26613                 | -1.41563412  | 8.649388116 | 10.06502224 |
| 228919_at    |             | AA601031  |                                 | -1.413873587 | 9.603116337 | 11.01698992 |
| 242114_at    | BOLA2       | BF088991  | 552900 Hs.444600, Hs.655267     | -1.413475448 | 5.852777746 | 7.266253194 |
| 236533_at    | ASAP1       | AW236958  | 50807 Hs.655552                 | -1.411281796 | 8.08459377  | 9.495875566 |
| 204840_s_at  | EEA1        | AI916242  | 8411 Hs.567367                  | -1.411245318 | 8.853897695 | 10.26514301 |
| 211022_s_at  | ATRX        | BC002521  | 546 Hs.533526, Hs.645562, Hs.65 | -1.411131568 | 7.473588778 | 8.884720345 |
| 238687_x_at  | ZNF770      | AV753065  | 54989 Hs.718498                 | -1.409718426 | 7.950974907 | 9.360693333 |
| 233658_at    |             | AK022413  |                                 | -1.409333259 | 5.170438173 | 6.579771431 |
| 242440_at    |             | N52821    |                                 | -1.40880093  | 4.813685687 | 6.222486617 |
| 236987_at    | ALPK2       | AI741514  | 115701 Hs.628152                | 1.407092729  | 7.536676224 | 6.129583496 |
| 229399_at    | C10orf118   | BF438440  | 55088 Hs.159066, Hs.603328      | -1.405573521 | 8.668436531 | 10.07401005 |
| 1560659_at   |             | AL832439  |                                 | -1.405207103 | 4.905442723 | 6.310649826 |
| 242576_x_at  | N4BP2L2     | AW503542  | 10443 Hs.507680                 | -1.402963057 | 4.747160545 | 6.150123602 |
| 243841_at    | SYNE2       | BE673396  | 23224 Hs.525392                 | -1.402300787 | 9.899789236 | 11.30209002 |
| 233405_at    |             | AU155384  |                                 | -1.402202857 | 4.609031424 | 6.011234281 |
| 233122_at    | KRTCAP2     | AU147619  | 200185 Hs.516671, Hs.704676     | 1.401954755  | 8.142714873 | 6.740760118 |



|             |              |           |           |                      |              |             |             |
|-------------|--------------|-----------|-----------|----------------------|--------------|-------------|-------------|
| 1557124_at  | LOC440104    | AK091705  | 440104    | Hs.616500            | 1.401952033  | 6.304711025 | 4.902758992 |
| 239005_at   |              | AW675572  |           |                      | -1.401730062 | 5.384171882 | 6.785901944 |
| 222407_s_at | ZFP106       | AI493587  | 64397     | Hs.511143            | -1.401580673 | 8.400458105 | 9.802038778 |
| 206667_s_at | SCAMP1       | AF005037  | 9522      | Hs.482587            | -1.400679693 | 6.071049497 | 7.47172919  |
| 201353_s_at | BAZ2A        | AI653126  | 11176     | Hs.314263            | 1.400318531  | 8.73381754  | 7.333499009 |
| 243745_at   |              | N74507    |           |                      | -1.399921266 | 7.158479702 | 8.558400968 |
| 1559119_at  |              | W01252    |           |                      | -1.399737357 | 4.890818407 | 6.290555764 |
| 225856_at   |              | BF512028  |           |                      | -1.399555907 | 8.915262665 | 10.31481857 |
| 210807_s_at | SLC16A7      | AF049608  | 9194      | Hs.439643            | -1.398390844 | 7.637300072 | 9.035690916 |
| 216521_s_at | BRCC3        | S72931    | 79184     | Hs.558537            | -1.397861258 | 8.938884842 | 10.3367461  |
| 244674_at   |              | AA936428  |           |                      | -1.39769894  | 4.914022305 | 6.311721245 |
| 210984_x_at | EGFR         | U95089    | 1956      | Hs.488293            | -1.397576559 | 7.378642912 | 8.776219471 |
| 59433_at    |              | N32185    |           |                      | -1.397300646 | 5.627416309 | 7.024716955 |
| 208662_s_at | TTC3         | AI885338  | 7267      | Hs.368214            | -1.396067241 | 9.084115322 | 10.48018256 |
| 225289_at   | STAT3        | AI139252  | 6774      | Hs.463059            | -2.395670195 | 8.880156004 | 11.2758262  |
| 1565882_at  |              | AK022126  |           |                      | -1.395483502 | 4.990235873 | 6.385719375 |
| 212368_at   | ZNF292       | AA972711  | 23036     | Hs.485892, Hs.656621 | -1.395290003 | 6.704567321 | 8.099857324 |
| 1558002_at  | STRAP        | BQ944989  | 11171     | Hs.719087            | -1.395241309 | 6.337122103 | 7.732363412 |
| 202354_s_at | GTF2F1       | AW190445  | 2962      | Hs.68257             | -1.394792654 | 6.956063101 | 8.350855756 |
| 213156_at   |              | BG251521  |           |                      | -1.39453162  | 8.639414092 | 10.03394571 |
| 244801_at   | PSMB7        | AI248671  | 5695      | Hs.213470            | -1.394445541 | 5.800647006 | 7.195092546 |
| 240152_at   |              | BF792954  |           |                      | -1.394443631 | 6.33016258  | 7.724606211 |
| 209055_s_at | CDC5L        | AW268817  | 988       | Hs.485471            | -1.3943081   | 8.753496981 | 10.14780508 |
| 237568_at   |              | H67156    |           |                      | -1.393232825 | 6.434854562 | 7.828087387 |
| 231939_s_at | BDP1         | AJ238520  | 55814     | Hs.258272            | -1.392521823 | 5.641151729 | 7.033673552 |
| 238787_at   |              | AA988769  |           |                      | -1.392312261 | 5.800175963 | 7.192488224 |
| 219978_s_at | NUSAP1       | NM_018454 | 51203     | Hs.615092            | -1.391413734 | 9.785202118 | 11.17661585 |
| 234605_at   | CDC14B       | AK024886  | 8555      | Hs.40582             | -1.391402871 | 5.11957591  | 6.510978781 |
| 222267_at   | TMEM209      | BE619220  | 84928     | Hs.267245            | -1.39121638  | 5.81596159  | 7.20717797  |
| 222303_at   |              | AV700891  |           |                      | -1.390397041 | 7.336632003 | 8.727029044 |
| 211503_s_at | RAB14        | AF112206  | 51552     | Hs.371563, Hs.713585 | -1.389495502 | 9.179910324 | 10.56940583 |
| 219757_s_at | C14orf101    | NM_017799 | 54916     | Hs.497253            | -1.388483353 | 6.452477666 | 7.840961019 |
| 1555920_at  | CBX3         | BU683892  | 11335     | Hs.381189, Hs.706294 | -1.387779782 | 6.693063395 | 8.080843177 |
| 242857_at   |              | AA748613  |           |                      | -1.387603413 | 7.223905939 | 8.611509352 |
| 224631_at   | ZFP91        | AA758013  | 80829     | Hs.524920            | -1.386916566 | 9.259679914 | 10.64659648 |
| 208250_s_at | DMBT1        | NM_004406 | 1755      | Hs.279611            | 1.385892914  | 7.117856553 | 5.731963638 |
| 242210_at   | ZNF24        | AA749167  | 7572      | Hs.514802            | -1.385750349 | 5.74278766  | 7.128538009 |
| 212332_at   | RBL2         | BF110947  | 5934      | Hs.513609            | -1.384893886 | 9.391516575 | 10.77641046 |
| 215509_s_at | BUB1         | AL137654  | 699       | Hs.469649            | -1.384556149 | 8.27825196  | 9.662808109 |
| 1557081_at  | RBM25        | AA580691  | 58517     | Hs.531106            | -1.384335935 | 8.264886654 | 9.649222589 |
| 243709_at   | SLC38A9      | BG054799  | 153129    | Hs.649685            | -1.384283697 | 5.657879163 | 7.04216286  |
| 235891_at   | LOC100128171 | AI961147  | 100128178 | Hs.584880            | 1.384265298  | 8.649616613 | 7.265351315 |
| 216362_at   |              | AJ251844  |           |                      | -1.383721372 | 5.697236741 | 7.080958113 |

|              |          |           |        |                      |              |             |             |
|--------------|----------|-----------|--------|----------------------|--------------|-------------|-------------|
| 241775_at    |          | AW298119  |        |                      | -1.382800796 | 5.151462383 | 6.53426318  |
| 203096_s_at  | RAPGEF2  | BF439282  | 9693   | Hs.113912            | -1.381884365 | 5.809719805 | 7.191604169 |
| 232198_at    |          | BF509125  |        |                      | -1.380645734 | 6.455516725 | 7.83616246  |
| 221043_at    |          | NM_013395 |        |                      | -1.379548842 | 6.641738322 | 8.021287164 |
| 1556382_a_at | NARG1    | AK091308  | 80155  | Hs.715706            | -1.379218877 | 4.820430546 | 6.199649422 |
| 239228_at    |          | AI298887  |        |                      | -1.379058712 | 6.106426093 | 7.485484804 |
| 226107_at    |          | AU156755  |        |                      | -1.37821753  | 7.303149462 | 8.681366992 |
| 229600_s_at  | CPD      | AW297717  | 1362   | Hs.446079            | -1.377642743 | 5.270044868 | 6.647687611 |
| 234723_x_at  |          | AK024881  |        |                      | -1.377489699 | 7.556823871 | 8.93431357  |
| 213672_at    | MARS     | AA621558  | 4141   | Hs.632707            | 1.377246068  | 9.128541496 | 7.751295428 |
| 1554930_a_at | FUT8     | AB049740  | 2530   | Hs.654961            | -1.376485582 | 6.478510841 | 7.854996423 |
| 221955_at    | GNA11    | AI040021  | 2767   | Hs.650575, Hs.654784 | -1.376344466 | 5.423495103 | 6.799839569 |
| 211631_x_at  | B4GALT1  | M22921    | 2683   | Hs.272011            | -1.376263523 | 5.738634424 | 7.114897947 |
| 1559397_s_at | PRR14    | BE788667  | 78994  | Hs.293629            | -1.37531619  | 6.201498302 | 7.576814492 |
| 205425_at    | HIP1     | NM_005338 | 3092   | Hs.329266, Hs.619089 | -1.373212086 | 7.142524238 | 8.515736323 |
| 209629_s_at  | NXT2     | AF201942  | 55916  | Hs.25010             | -1.373045055 | 5.940369677 | 7.313414732 |
| 229692_at    |          | AW135003  |        |                      | -1.372761974 | 4.949092005 | 6.321853979 |
| 223578_x_at  | MALAT1   | AF113016  | 378938 | Hs.642877, Hs.714394 | -1.372727552 | 10.64251638 | 12.01524394 |
| 212382_at    | TCF4     | BF433429  | 6925   | Hs.605153            | -1.371358019 | 9.170417176 | 10.5417752  |
| 229684_s_at  | ZNF644   | AI582177  | 84146  | Hs.173001            | -1.371271002 | 8.719150649 | 10.09042165 |
| 201101_s_at  | BCLAF1   | BE963370  | 9774   | Hs.486542            | -1.370975873 | 10.02931004 | 11.40028591 |
| 228573_at    | ANTXR2   | BE673665  | 118429 | Hs.162963            | 1.368350067  | 9.83555831  | 8.467208243 |
| 217370_x_at  |          | S75762    |        |                      | -1.367340038 | 10.24734707 | 11.61468711 |
| 232913_at    | TMED8    | AC007954  | 283578 | Hs.200413, Hs.26403  | -1.366890397 | 7.018452124 | 8.385342521 |
| 236241_at    | MED31    | BF593977  | 51003  | Hs.567493            | -1.366730999 | 5.117303279 | 6.484034278 |
| 202600_s_at  | NRIP1    | AI824012  | 8204   | Hs.155017            | -1.366180777 | 7.043619517 | 8.409800294 |
| 233518_at    |          | AU144449  |        |                      | -1.36604184  | 6.230468636 | 7.596510476 |
| 211721_s_at  | ZNF551   | BC005868  | 90233  | Hs.109540            | -1.364881117 | 6.3244758   | 7.689356916 |
| 209127_s_at  | SART3    | AW173076  | 9733   | Hs.584842            | -1.364229749 | 10.0325216  | 11.39675135 |
| 223111_x_at  | ARID4B   | BF058966  | 51742  | Hs.533633, Hs.575782 | -1.363197405 | 7.230047119 | 8.593244523 |
| 237551_at    | URB1     | AW444712  | 9875   | Hs.473611            | -1.362130148 | 4.901789419 | 6.263919567 |
| 242191_at    |          | AI701905  |        |                      | -1.361884392 | 7.158983819 | 8.520868211 |
| 242575_at    | SMG7     | AW295593  | 9887   | Hs.591463            | -1.360845855 | 5.18368404  | 6.544529895 |
| 203975_s_at  | CHAF1A   | BF000239  | 10036  | Hs.79018             | -1.359937872 | 8.03729008  | 9.397227952 |
| 232013_at    | C9orf102 | AL133663  | 375748 | Hs.432364            | -1.358044943 | 8.514474385 | 9.872519328 |
| 228629_s_at  |          | BF116063  |        |                      | -1.356705638 | 6.312474163 | 7.669179801 |
| 233818_at    | RNF160   | AK023499  | 26046  | Hs.288773            | -1.355498394 | 4.874015065 | 6.229513459 |
| 217024_x_at  | SIRPA    | AC004832  | 140885 | Hs.581021, Hs.679042 | -1.354968268 | 6.560101308 | 7.915069575 |
| 244248_at    | TTC27    | AI129850  | 55622  | Hs.468125            | -1.354600803 | 4.866409292 | 6.221010095 |
| 1558710_at   |          | BI791845  |        |                      | -1.354096807 | 4.903700815 | 6.257797622 |
| 1554310_a_at | EIF4G3   | BC030578  | 8672   | Hs.467084            | -1.353781325 | 8.033274223 | 9.387055548 |
| 242688_at    |          | AI149880  |        |                      | -1.353269554 | 7.899027289 | 9.252296843 |
| 214543_x_at  | QKI      | AF142421  | 9444   | Hs.510324, Hs.593520 | -1.352354733 | 6.948739909 | 8.301094641 |

|              |           |           |        |                      |              |             |             |
|--------------|-----------|-----------|--------|----------------------|--------------|-------------|-------------|
| 228634_s_at  | CSDA      | BF195718  | 8531   | Hs.221889            | -1.351894177 | 8.883223047 | 10.23511722 |
| 225237_s_at  | MSI2      | BF435123  | 124540 | Hs.658922            | -1.351704927 | 5.806564598 | 7.158269524 |
| 210256_s_at  | PIP5K1A   | U78576    | 8394   | Hs.655131, Hs.707569 | -1.351590697 | 6.888908086 | 8.240498783 |
| 226526_s_at  |           | BG165420  |        |                      | -1.350998031 | 4.709719275 | 6.060717306 |
| 242321_at    |           | AI628689  |        |                      | -1.350968689 | 7.438912324 | 8.789881012 |
| 201668_x_at  | MARCKS    | AW163148  | 4082   | Hs.519909, Hs.712721 | -1.350955704 | 8.156670226 | 9.50762593  |
| 240008_at    |           | AI955765  |        |                      | -1.3502129   | 4.89797758  | 6.24819048  |
| 1559403_at   |           | BC042096  |        |                      | 1.350157357  | 6.184463818 | 4.834306461 |
| 238940_at    | KLF12     | BE328128  | 11278  | Hs.373857, Hs.592500 | -1.348683449 | 4.863993113 | 6.212676562 |
| 216711_s_at  | TAF1      | M73444    | 6872   | Hs.158560            | -1.348127008 | 6.095045369 | 7.443172377 |
| 1555154_a_at | QKI       | AF142421  | 9444   | Hs.510324, Hs.593520 | -1.348096658 | 7.318471326 | 8.666567984 |
| 223627_at    | MEX3B     | AL136778  | 84206  | Hs.104744            | -1.348045117 | 5.108874328 | 6.456919445 |
| 1555754_s_at | ATN1      | Z22814    | 1822   | Hs.143766            | -1.347946811 | 5.090740382 | 6.438687193 |
| 210995_s_at  | TRIM23    | AF230399  | 373    | Hs.792               | -1.34792047  | 6.757461794 | 8.105382264 |
| 220368_s_at  | SMEK1     | NM_017936 | 55671  | Hs.533887            | -1.347845687 | 8.578109252 | 9.92595494  |
| 201711_x_at  | RANBP2    | AI681120  | 5903   | Hs.199561, Hs.715056 | -1.347430985 | 9.696221112 | 11.0436521  |
| 1569142_at   | TRIM13    | BC029514  | 10206  | Hs.436922            | -1.347210598 | 4.839124035 | 6.186334633 |
| 1555153_s_at | FCHO2     | BC014311  | 115548 | Hs.719247            | -1.346400965 | 5.973134215 | 7.319535179 |
| 238809_at    | C5orf51   | BF439305  | 285636 | Hs.29899             | -1.346160723 | 6.23765072  | 7.583811443 |
| 219262_at    | SUV39H2   | NM_024670 | 79723  | Hs.554883            | -1.34605887  | 6.160442718 | 7.506501589 |
| 235014_at    | LOC147727 | BF345728  | 147727 | Hs.631616            | -1.346026862 | 8.075185748 | 9.42121261  |
| 232704_s_at  | LRRFIP2   | AK025207  | 9209   | Hs.719246            | -1.345353577 | 5.085510664 | 6.430864242 |
| 236066_at    |           | AI292073  |        |                      | -1.3450528   | 7.3943533   | 8.7394061   |
| 244682_at    | CAMSAP1   | H11471    | 157922 | Hs.522493            | -1.344318274 | 4.995774894 | 6.340093168 |
| 244401_at    | LCA5      | AI922939  | 167691 | Hs.21945             | -1.344313649 | 5.813784091 | 7.15809774  |
| 223950_s_at  | FLYWCH1   | AL136585  | 84256  | Hs.655321            | 1.343897662  | 9.706417684 | 8.362520022 |
| 232551_at    | SLC26A6   | AA521443  | 65010  | Hs.631925, Hs.663208 | -1.343530657 | 4.696154192 | 6.039684849 |
| 211078_s_at  | STK3      | Z25422    | 6788   | Hs.492333            | -1.343469651 | 4.741008222 | 6.084477873 |
| 1568983_a_at |           | BI547087  |        |                      | -1.343233256 | 6.313835398 | 7.657068654 |
| 242696_at    |           | AI252004  |        |                      | -1.342103933 | 6.47440567  | 7.816509603 |
| 234951_s_at  | COL12A1   | AL080250  | 1303   | Hs.101302            | -1.34131722  | 7.197894102 | 8.539211322 |
| 217813_s_at  | SPIN1     | NM_006717 | 10927  | Hs.146804            | -1.341195211 | 6.585723075 | 7.926918286 |
| 241736_at    | FBXW2     | AW501195  | 26190  | Hs.494985            | -1.341170061 | 6.05790138  | 7.39907144  |
| 205701_at    | IPO8      | NM_006390 | 10526  | Hs.505136            | -1.341109613 | 8.25803859  | 9.599148203 |
| 242325_at    | YWHAH     | AA909983  | 7533   | Hs.226755            | -1.340515105 | 5.637406966 | 6.97792207  |
| 233621_s_at  | ARHGFE12  | AL137456  | 23365  | Hs.24598             | -1.340384708 | 7.014428176 | 8.354812884 |
| 215515_at    |           | AL049268  |        |                      | -1.339953286 | 7.255665518 | 8.595618804 |
| 1558733_at   | ZBTB38    | BE386445  | 253461 | Hs.715534            | -1.339726759 | 9.591266925 | 10.93099368 |
| 215415_s_at  | LYST      | U70064    | 1130   | Hs.532411            | -1.339455631 | 5.020339362 | 6.359794993 |
| 215220_s_at  | TPR       | AK023111  | 7175   | Hs.279640            | -1.339423374 | 9.097727478 | 10.43715085 |
| 243206_at    |           | BE082914  |        |                      | -1.339123036 | 5.349385659 | 6.688508694 |
| 244852_at    | DSEL      | AU119545  | 92126  | Hs.124673            | -1.338409849 | 6.645928903 | 7.984338752 |
| 213362_at    | PTPRD     | N73931    | 5789   | Hs.446083            | -1.338372616 | 4.976065759 | 6.314438374 |

|              |           |           |        |                      |              |             |             |
|--------------|-----------|-----------|--------|----------------------|--------------|-------------|-------------|
| 243304_at    | LOC286109 | AI733824  | 286109 | Hs.660189            | -1.338178339 | 6.718162463 | 8.056340802 |
| 235016_at    | REEP3     | AL118571  | 221035 | Hs.499833            | -1.337369715 | 5.442101346 | 6.77947106  |
| 232222_at    | C18orf49  | AK000229  | 400653 | Hs.114191            | 1.337149825  | 6.947961846 | 5.610812021 |
| 207198_s_at  | LIMS1     | NM_004987 | 3987   | Hs.597715, Hs.613268 | -1.336856798 | 9.28505484  | 10.62191164 |
| 235632_at    |           | AI638195  |        |                      | -1.336420754 | 5.350920263 | 6.687341016 |
| 232796_at    |           | AK021556  |        |                      | -1.3356486   | 5.251533636 | 6.587182236 |
| 230377_s_at  | TBC1D2B   | BE504351  | 23102  | Hs.719242            | -1.334454905 | 6.271882413 | 7.606337318 |
| 1562681_at   | LOC338651 | AK055141  | 338651 | Hs.633229, Hs.673618 | -1.333946048 | 4.84695901  | 6.180905058 |
| 212808_at    | NFATC2IP  | AI884627  | 84901  | Hs.513470            | -1.333445987 | 8.906278082 | 10.23972407 |
| 214305_s_at  | SF3B1     | AW003030  | 23451  | Hs.632554            | -1.333056186 | 10.01343122 | 11.34648741 |
| 206654_s_at  | POLR3G    | NM_006467 | 10622  | Hs.282387            | -1.33259618  | 6.771350827 | 8.103947007 |
| 204741_at    | BICD1     | NM_001714 | 636    | Hs.505202            | -1.332593741 | 6.116303104 | 7.448896845 |
| 1553750_a_at | FAM76B    | NM_144664 | 143684 | Hs.288304            | -1.33153671  | 7.082293198 | 8.413829909 |
| 206638_at    | HTR2B     | NM_000867 | 3357   | Hs.421649            | -1.330887261 | 6.140122292 | 7.471009553 |
| 232503_at    | ELP2      | AK022709  | 55250  | Hs.8739              | -1.330690401 | 6.54387974  | 7.874570141 |
| 228556_at    | YTHDC1    | AI990739  | 91746  | Hs.175955            | -1.330016965 | 8.639620384 | 9.969637349 |
| 209131_s_at  | SNAP23    | U55936    | 8773   | Hs.719238            | -1.329595147 | 7.040894696 | 8.370489844 |
| 222616_s_at  | USP16     | AI806796  | 10600  | Hs.99819             | -1.329418524 | 10.20854951 | 11.53796803 |
| 208629_s_at  | HADHA     | BG472176  | 3030   | Hs.516032            | -1.329312822 | 9.487031733 | 10.81634455 |
| 202082_s_at  | SEC14L1   | AV748469  | 6397   | Hs.464184            | -1.327407742 | 9.667419978 | 10.99482772 |
| 227524_at    |           | H06187    |        |                      | -1.327043602 | 6.357530779 | 7.684574381 |
| 211467_s_at  | NFIB      | U70862    | 4781   | Hs.644095            | -1.327026587 | 5.756493442 | 7.083520029 |
| 1565717_s_at |           | BE930017  |        |                      | -1.326628125 | 8.426157402 | 9.752785527 |
| 210170_at    | PDLIM3    | BC001017  | 27295  | Hs.85862             | 1.326533686  | 6.646843465 | 5.320309779 |
| 218618_s_at  | FNDC3B    | NM_022763 | 64778  | Hs.159430            | -1.326364698 | 7.43613024  | 8.762494938 |
| 240757_at    | CLASP1    | H49240    | 23332  | Hs.469840, Hs.708183 | -1.326237518 | 5.102066387 | 6.428303905 |
| 224098_at    |           | AF116638  |        |                      | -1.325761246 | 5.048239411 | 6.374000656 |
| 232615_at    |           | AA632758  |        |                      | -1.325027243 | 7.767170598 | 9.092197841 |
| 1569126_at   | CCNC      | BC026272  | 892    | Hs.430646, Hs.633351 | -1.32422139  | 4.815504046 | 6.139725436 |
| 231012_at    | TMEM20    | AI123333  | 159371 | Hs.632085            | -1.323584403 | 5.066101711 | 6.389686114 |
| 205356_at    | USP13     | NM_003940 | 8975   | Hs.175322            | -1.322552331 | 8.497912219 | 9.820464551 |
| 225942_at    | NLN       | AB033052  | 57486  | Hs.247460            | -1.32237603  | 7.00261547  | 8.324991499 |
| 211340_s_at  | MCAM      | M28882    | 4162   | Hs.599039            | 1.321767936  | 9.081714196 | 7.759946259 |
| 1562957_at   |           | BC010059  |        |                      | -1.321453436 | 5.410445408 | 6.731898844 |
| 215855_s_at  | TMF1      | AK021741  | 7110   | Hs.267632            | -1.320969537 | 5.198394393 | 6.51936393  |
| 1553691_at   | B3GALNT2  | NM_152490 | 148789 | Hs.716571            | -1.319472711 | 5.993533096 | 7.313005807 |
| 229301_at    | TUG1      | AA046436  | 55000  | Hs.554829            | -1.318946756 | 5.37914388  | 6.698090636 |
| 202072_at    | HNRNPL    | NM_001533 | 3191   | Hs.644906            | -1.318011838 | 10.08834282 | 11.40635466 |
| 207604_s_at  | SLC4A7    | NM_003615 | 9497   | Hs.250072            | -1.318001293 | 8.27371944  | 9.591720733 |
| 231716_at    | RC3H2     | AF255304  | 54542  | Hs.533499            | -1.317529859 | 8.469914058 | 9.787443917 |
| 206967_at    | CCNT1     | NM_001240 | 904    | Hs.279906            | -1.316871094 | 6.068133269 | 7.385004363 |
| 219717_at    | DCAF16    | NM_017741 | 54876  | Hs.614787            | -1.316733539 | 8.228791588 | 9.545525127 |
| 217054_at    | MUC3A     | AF007194  | 4584   | Hs.489354            | 1.31648546   | 6.77985026  | 5.4633648   |

|              |           |           |        |                             |              |             |             |
|--------------|-----------|-----------|--------|-----------------------------|--------------|-------------|-------------|
| 1557372_at   | FLJ41757  | AF086285  | 440862 | Hs.437691                   | -1.315983972 | 5.007216507 | 6.323200479 |
| 243025_at    |           | AL119189  |        |                             | -1.315326362 | 5.064529933 | 6.379856295 |
| 213962_s_at  | ANKLE2    | AI924382  | 23141  | Hs.654628                   | -1.315144625 | 8.290013647 | 9.605158272 |
| 217218_at    | WAPAL     | AK027005  | 23063  | Hs.203099, Hs.714876        | -1.314788713 | 5.821917763 | 7.136706476 |
| 242691_at    |           | AA829017  |        |                             | -1.314469123 | 6.862288632 | 8.176757756 |
| 235188_at    | C14orf135 | AI479328  | 64430  | Hs.509499                   | -1.314439501 | 5.131392994 | 6.445832495 |
| 226971_at    | CCDC136   | AI678057  | 64753  | Hs.521178                   | 1.313948845  | 6.532487768 | 5.218538923 |
| 226429_at    | KIAA1704  | BE218238  | 55425  | Hs.507922                   | -1.313821625 | 7.027634659 | 8.341456284 |
| 215481_s_at  | PEX5      | AW468717  | 5830   | Hs.567327                   | -1.313731045 | 6.272137225 | 7.58586827  |
| 212417_at    | SCAMP1    | BF058944  | 9522   | Hs.482587                   | -1.313377932 | 8.602127992 | 9.915505924 |
| 236371_s_at  | TGS1      | AI806471  | 96764  | Hs.335068                   | -1.313068745 | 9.008357443 | 10.32142619 |
| 223139_s_at  | DHX36     | BE501133  | 170506 | Hs.446270                   | -1.312967682 | 9.982043671 | 11.29501135 |
| 233888_s_at  | SRGAP1    | AK023899  | 57522  | Hs.210751, Hs.593803        | -1.312944102 | 8.650095587 | 9.963039689 |
| 1558647_at   | SH3D19    | AA100736  | 152503 | Hs.567725                   | -1.311990593 | 6.27182085  | 7.583811443 |
| 204909_at    | DDX6      | NM_004397 | 1656   | Hs.654366                   | -1.311697208 | 9.508175569 | 10.81987278 |
| 201224_s_at  | SRRM1     | AU147713  | 10250  | Hs.18192                    | -1.311336968 | 9.346598119 | 10.65793509 |
| 236268_at    | SEC22C    | BF732413  | 9117   | Hs.445892                   | -1.310707886 | 6.522245347 | 7.832953233 |
| 212095_s_at  | MTUS1     | BE552421  | 57509  | Hs.7946                     | -1.310406422 | 6.153421528 | 7.463827951 |
| 241624_at    | LOC389834 | BE221330  | 389834 | Hs.595418                   | -1.310214836 | 7.167058484 | 8.47727332  |
| 239729_at    |           | BE066500  |        |                             | -1.309971673 | 5.020360401 | 6.330332074 |
| 220820_at    |           | NM_018539 |        |                             | -1.309769745 | 5.282765153 | 6.592534898 |
| 211607_x_at  | EGFR      | U48722    | 1956   | Hs.488293                   | -1.309136835 | 7.427822831 | 8.736959666 |
| 218521_s_at  | UBE2W     | NM_018299 | 55284  | Hs.597486                   | -1.308870212 | 7.296303867 | 8.605174079 |
| 232229_at    | SETX      | AK024331  | 23064  | Hs.460317                   | -1.308665687 | 6.776675601 | 8.085341288 |
| 238563_at    |           | AV762916  |        |                             | -1.308412426 | 5.236117469 | 6.544529895 |
| 1557938_s_at | PTRF      | AL545542  | 284119 | Hs.437191                   | -1.307736804 | 8.274081063 | 9.581817867 |
| 213328_at    | NEK1      | AI936517  | 4750   | Hs.481181                   | -1.307540093 | 8.689462969 | 9.997003062 |
| 208221_s_at  | SLIT1     | NM_003061 | 6585   | Hs.632082                   | 1.307449415  | 6.22824244  | 4.920793025 |
| 239735_at    |           | N67106    |        |                             | -1.306876145 | 5.642266564 | 6.949142709 |
| 239606_at    |           | AA669135  |        |                             | -1.306719255 | 6.241278002 | 7.547997257 |
| 219790_s_at  | NPR3      | NM_000908 | 4883   | Hs.237028, Hs.619466        | -1.306684105 | 7.129699013 | 8.436383118 |
| 209936_at    | RBM5      | AF107493  | 10181  | Hs.439480                   | -1.306383333 | 5.778401592 | 7.084784925 |
| 1554390_s_at | ACTR2     | BC036253  | 10097  | Hs.643727, Hs.719274        | -1.30597541  | 9.710617726 | 11.01659314 |
| 213352_at    | TMCC1     | AB018322  | 23023  | Hs.477547, Hs.709936        | -1.305506158 | 5.597027898 | 6.902534056 |
| 220219_s_at  |           | NM_018001 |        |                             | -1.305432271 | 9.799713708 | 11.10514598 |
| 208677_s_at  | BSG       | AL550657  | 682    | Hs.501293                   | -1.304238157 | 10.17451133 | 11.47874994 |
| 223584_s_at  | KBTBD2    | BF000166  | 25948  | Hs.372541                   | -1.304097864 | 7.834912456 | 9.13901032  |
| 209700_x_at  | PDE4DIP   | AB042555  | 9659   | Hs.584841, Hs.613082, Hs.65 | -1.303117991 | 4.750662753 | 6.053780744 |
| 235112_at    |           | AA088388  |        |                             | -1.301909383 | 6.065458742 | 7.367368125 |
| 1566557_at   | FLJ90757  | AK096609  | 440465 | Hs.448889                   | 1.301743859  | 8.892330933 | 7.590587074 |
| 214734_at    | EXPH5     | AB014524  | 23086  | Hs.28540                    | -1.301467018 | 4.836431761 | 6.137898779 |
| 1555058_a_at | LPGAT1    | BC034621  | 9926   | Hs.497674                   | -1.30139593  | 8.291036306 | 9.592432236 |
| 205966_at    | TAF13     | NM_005645 | 6884   | Hs.632426                   | -1.301225835 | 6.292641238 | 7.593867073 |

|              |             |           |        |                             |              |             |             |
|--------------|-------------|-----------|--------|-----------------------------|--------------|-------------|-------------|
| 231689_at    | TRPM7       | BE044721  | 54822  | Hs.512894                   | -1.301154494 | 7.453995946 | 8.755150439 |
| 230892_at    |             | AI912194  |        |                             | -1.300677231 | 4.951023867 | 6.251701098 |
| 242630_at    |             | AA005355  |        |                             | -1.300468719 | 4.70362295  | 6.00409167  |
| 243070_at    | INO80D      | AI954752  | 54891  | Hs.445036                   | -1.30036918  | 6.330298764 | 7.630667944 |
| 236019_at    | RAB12       | AI076335  | 201475 | Hs.270074                   | -1.300334322 | 4.727083507 | 6.027417829 |
| 1568822_at   | GTPBP5      | BC040178  | 26164  | Hs.340636                   | -1.300306879 | 4.817847738 | 6.118154616 |
| 206744_s_at  | ZMYM5       | NM_014242 | 9205   | Hs.530988                   | -1.300182889 | 5.299835222 | 6.600018111 |
| 235789_at    | KDM4B       | AW450344  | 23030  | Hs.654816                   | -1.298941725 | 5.418251845 | 6.717193571 |
| 214374_s_at  | PPFIBP1     | AI962377  | 8496   | Hs.172445                   | -1.298317569 | 9.868586263 | 11.16690383 |
| 1563497_at   | USP25       | AL833500  | 29761  | Hs.473370                   | -1.298295571 | 5.015546548 | 6.31384212  |
| 201732_s_at  | CLCN3       | AF029346  | 1182   | Hs.481186                   | -1.298279636 | 8.746095112 | 10.04437475 |
| 203293_s_at  | LMAN1       | NM_005570 | 3998   | Hs.465295                   | -1.298123746 | 6.869741747 | 8.167865493 |
| 208610_s_at  | SRRM2       | AI655799  | 23524  | Hs.433343, Hs.719123        | -1.297386298 | 8.179104486 | 9.476490784 |
| 205868_s_at  | PTPN11      | L07527    | 5781   | Hs.506852, Hs.646231        | -1.29666565  | 7.246898368 | 8.543564018 |
| 207319_s_at  | CDC2L5      | NM_003718 | 8621   | Hs.233552                   | -1.296413809 | 7.17253282  | 8.468946628 |
| 232835_at    |             | AA533080  |        |                             | -1.295979577 | 6.339534491 | 7.635514068 |
| 238988_at    |             | AI863675  |        |                             | -1.295580239 | 5.422064332 | 6.717644572 |
| 241508_at    |             | T63605    |        |                             | -1.295369174 | 4.966813911 | 6.262183086 |
| 241865_at    |             | AI056689  |        |                             | -1.295106513 | 6.61795125  | 7.913057763 |
| 208711_s_at  | CCND1       | BC000076  | 595    | Hs.523852                   | -1.294351979 | 7.982387974 | 9.276739953 |
| 239393_at    |             | AW510927  |        |                             | -1.293612567 | 5.500979274 | 6.794591841 |
| 239965_at    | LOC151878   | AW009761  | 151878 | Hs.680377                   | -1.29337665  | 5.606779576 | 6.900156226 |
| 213478_at    | RP1-21O18.1 | AB028949  | 23254  | Hs.368823                   | -1.293206146 | 6.647431676 | 7.940637822 |
| 209438_at    | PHKA2       | AL096700  | 5256   | Hs.54941, Hs.607628, Hs.622 | 1.293135642  | 6.649564586 | 5.356428945 |
| 1560100_at   | DLX1        | AK095266  | 1745   | Hs.407015                   | -1.292939331 | 5.556895759 | 6.849835089 |
| 239899_at    | RNF145      | AW378236  | 153830 | Hs.349306                   | -1.292893664 | 8.083994475 | 9.37688814  |
| 201559_s_at  | CLIC4       | AF109196  | 25932  | Hs.440544, Hs.595507        | -1.292768984 | 8.834023034 | 10.12679202 |
| 236696_at    | SR140       | BE464843  | 23350  | Hs.596572                   | -1.292743908 | 6.402185985 | 7.694929893 |
| 1554466_a_at | C16orf13    | BC007207  | 84326  | Hs.239500                   | -1.292228222 | 9.02029198  | 10.3125202  |
| 1559722_at   |             | BC042892  |        |                             | -1.292157355 | 5.853621989 | 7.145779344 |
| 212420_at    | ELF1        | AL559590  | 1997   | Hs.135646                   | -1.291597912 | 9.652938829 | 10.94453674 |
| 208553_at    | HIST1H1E    | NM_005321 | 3008   | Hs.248133                   | -1.290598191 | 5.501012188 | 6.791610379 |
| 214941_s_at  | PRPF40A     | AA675900  | 55660  | Hs.643580                   | -1.290501014 | 7.426592028 | 8.717093041 |
| 218300_at    | C16orf53    | NM_024516 | 79447  | Hs.702841                   | -1.289837255 | 10.34709716 | 11.63693441 |
| 231520_at    | SLC35F3     | BF195423  | 148641 | Hs.158748                   | 1.289763249  | 6.057214247 | 4.767450998 |
| 220254_at    | LRP12       | NM_013437 | 29967  | Hs.600630                   | -1.289313357 | 7.032215527 | 8.321528883 |
| 240050_s_at  |             | BF751607  |        |                             | -1.288983736 | 7.015039127 | 8.304022863 |
| 211804_s_at  | CDK2        | AB012305  | 1017   | Hs.19192, Hs.689624         | -1.288951837 | 5.249270112 | 6.538221949 |
| 231011_at    | LARP1B      | AI339785  | 55132  | Hs.657067                   | -1.288265127 | 6.922993127 | 8.211258254 |
| 213272_s_at  | TMEM159     | AF070596  | 57146  | Hs.258212                   | -1.288234595 | 6.541425976 | 7.829660571 |
| 214192_at    | NUP88       | Y08613    | 4927   | Hs.584784                   | -1.288227173 | 6.942002515 | 8.230229687 |
| 237554_at    |             | BE348304  |        |                             | -1.28756907  | 5.293317506 | 6.580886576 |
| 229284_at    | MAT2B       | R60683    | 27430  | Hs.54642                    | -1.287509414 | 6.153421528 | 7.440930942 |

|              |           |           |        |                             |              |             |             |
|--------------|-----------|-----------|--------|-----------------------------|--------------|-------------|-------------|
| 215203_at    | GOLGA4    | AW438464  | 2803   | Hs.344151                   | -1.286782041 | 6.999026296 | 8.285808337 |
| 219221_at    | ZBTB38    | NM_024724 | 253461 | Hs.715534                   | -1.286427739 | 9.892076002 | 11.17850374 |
| 231957_s_at  | DPP9      | AC005594  | 91039  | Hs.515081                   | -1.286372284 | 5.943160107 | 7.229532391 |
| 1559496_at   | PPA2      | AL833123  | 27068  | Hs.654957                   | -1.284540756 | 5.07797186  | 6.362512616 |
| 1555469_a_at | CLASP2    | BC029035  | 23122  | Hs.108614                   | -1.28401349  | 6.129451231 | 7.413464721 |
| 205187_at    | SMAD5     | AF010601  | 4090   | Hs.167700                   | -1.283263374 | 8.421567265 | 9.704830639 |
| 229434_at    |           | AA865357  |        |                             | -1.283038777 | 7.291052364 | 8.574091141 |
| 1552677_a_at | DIP2A     | NM_015151 | 23181  | Hs.189585                   | -1.282053443 | 5.389207816 | 6.671261259 |
| 213490_s_at  | MAP2K2    | AI762811  | 5605   | Hs.465627                   | -1.280531933 | 6.212971522 | 7.493503455 |
| 215062_at    |           | AL390143  |        |                             | -1.280445033 | 4.916096696 | 6.196541729 |
| 222311_s_at  | SFRS15    | AA648521  | 57466  | Hs.17255                    | -1.280400813 | 8.166726959 | 9.447127773 |
| 225640_at    | LOC401504 | AA875998  | 401504 | Hs.446271                   | -1.280392235 | 7.952162552 | 9.232554788 |
| 244515_at    | PSMD7     | AI640348  | 5713   | Hs.440604                   | -1.280318685 | 5.018796249 | 6.299114933 |
| 215820_x_at  | SNX13     | AK001861  | 23161  | Hs.487648                   | -1.279675056 | 5.949799401 | 7.229474457 |
| 215434_x_at  |           | AV684285  |        |                             | -1.279433066 | 8.733824919 | 10.01325798 |
| 216213_at    | NEK1      | AF155113  | 4750   | Hs.481181                   | -1.279051377 | 5.743469921 | 7.022521298 |
| 241701_at    | ARHGAP21  | BF369489  | 57584  | Hs.524195                   | -1.278878798 | 6.275720027 | 7.554598825 |
| 228628_at    | SRGAP2P1  | AI478268  | 653464 | Hs.523529, Hs.698027        | -1.278421358 | 7.54442516  | 8.822846519 |
| 211085_s_at  | STK4      | Z25430    | 6789   | Hs.472838                   | -1.278408633 | 7.319848982 | 8.598257615 |
| 243003_at    |           | AV702197  |        |                             | -1.278214508 | 7.687762031 | 8.965976539 |
| 235938_at    |           | AI018174  |        |                             | -1.277558372 | 5.85669793  | 7.134256302 |
| 219878_s_at  | KLF13     | NM_015995 | 51621  | Hs.525752                   | -1.277148479 | 4.842546038 | 6.119694516 |
| 213862_at    | PNPLA2    | AI979087  | 57104  | Hs.654697                   | -1.276894974 | 4.920804589 | 6.197699563 |
| 212078_s_at  | MLL       | AA704766  | 4297   | Hs.258855                   | -1.276275595 | 8.588960137 | 9.865235732 |
| 200641_s_at  | YWHAZ     | U28964    | 7534   | Hs.492407, Hs.594673        | -1.275922229 | 10.21998673 | 11.49590896 |
| 229462_at    | C9orf82   | AW296077  | 79886  | Hs.178357                   | -1.275423708 | 4.908904642 | 6.18432835  |
| 215990_s_at  | BCL6      | S67779    | 604    | Hs.478588                   | -1.272944253 | 8.469449528 | 9.742393782 |
| 225383_at    | ZNF275    | BF793625  | 10838  | Hs.348963                   | -1.272248872 | 8.400225694 | 9.672474565 |
| 241193_at    | ETS2      | AI797080  | 2114   | Hs.644231                   | -1.272128842 | 6.749389048 | 8.02151789  |
| 229281_at    | NPAS3     | N51682    | 64067  | Hs.657892                   | 1.271806463  | 6.047517018 | 4.775710556 |
| 227514_at    | ITPRIPL2  | AI766311  | 162073 | Hs.530899, Hs.648523        | -1.271683328 | 9.669311696 | 10.94099502 |
| 214487_s_at  |           | NM_002886 |        |                             | -1.270796106 | 6.00151018  | 7.272306286 |
| 238419_at    | PHLDB2    | T68150    | 90102  | Hs.477114, Hs.655022, Hs.67 | -1.270751406 | 9.069868683 | 10.34062009 |
| 208960_s_at  | KLF6      | BE675435  | 1316   | Hs.4055, Hs.709396          | -1.270334711 | 9.201748707 | 10.47208342 |
| 227954_at    | ITPRIPL2  | AI458417  | 162073 | Hs.530899, Hs.648523        | -1.269381429 | 9.701618721 | 10.97100015 |
| 217278_x_at  |           | AF023203  |        |                             | 1.269203175  | 6.163016533 | 4.893813358 |
| 205457_at    | C6orf106  | NM_024294 | 64771  | Hs.643498                   | -1.268869625 | 8.111803214 | 9.380672839 |
| 201971_s_at  | ATP6V1A   | NM_001690 | 523    | Hs.477155                   | -1.268837858 | 5.947458765 | 7.216296623 |
| 236007_at    | AKAP10    | AU147278  | 11216  | Hs.708043                   | -1.268596139 | 6.708847711 | 7.97744385  |
| 230808_at    | FNTA      | AA833870  | 2339   | Hs.370312                   | -1.268279725 | 5.537101394 | 6.805381119 |
| 206668_s_at  | SCAMP1    | NM_004866 | 9522   | Hs.482587                   | -1.267548328 | 8.133187858 | 9.400736185 |
| 241893_at    |           | BE927766  |        |                             | -1.267518025 | 4.973645542 | 6.241163568 |
| 232975_at    | HCG18     | AK023334  | 414777 | Hs.485041, Hs.717017        | -1.267076707 | 6.976955052 | 8.24403176  |

|              |            |           |           |                      |              |             |             |
|--------------|------------|-----------|-----------|----------------------|--------------|-------------|-------------|
| 214693_x_at  | NBPF10     | BE732345  | 100132406 | Hs.515947            | -1.266591716 | 10.21484226 | 11.48143398 |
| 232309_at    | LOC202181  | Y13871    | 202181    | Hs.189914, Hs.653052 | -1.266480366 | 5.996492386 | 7.262972752 |
| 201647_s_at  | SCARB2     | NM_005506 | 950       | Hs.349656, Hs.714206 | -1.265825498 | 8.169296458 | 9.435121956 |
| 241359_at    |            | AA729232  |           |                      | 1.265779908  | 7.775978666 | 6.510198758 |
| 206108_s_at  | SFRS6      | NM_006275 | 6431      | Hs.6891              | -1.265576882 | 8.063151755 | 9.328728636 |
| 244110_at    | MLL        | BE669782  | 4297      | Hs.258855            | 1.263292462  | 7.764430056 | 6.501137594 |
| 242752_at    |            | AI434789  |           |                      | -1.262371324 | 7.398094237 | 8.660465561 |
| 209701_at    |            | D16217    |           |                      | -1.262251565 | 9.764894044 | 11.02714561 |
| 216357_at    | SNX1       | AL050148  | 6642      | Hs.188634            | -1.261759404 | 4.916301434 | 6.178060838 |
| 1556277_a_at | PAPD4      | BG542611  | 167153    | Hs.418198            | -1.26088477  | 6.479268466 | 7.740153236 |
| 229571_at    |            | AV763524  |           |                      | -1.260820716 | 5.499274285 | 6.760095001 |
| 236235_at    | ITCH       | AA868238  | 83737     | Hs.632272            | -1.260645275 | 5.092415724 | 6.353060998 |
| 229765_at    | ZNF207     | AW511239  | 7756      | Hs.500775            | -1.260607579 | 6.058611825 | 7.319219404 |
| 213922_at    | TTBK2      | AW294686  | 146057    | Hs.659846, Hs.713940 | -1.260040325 | 5.927489736 | 7.18753006  |
| 1552873_s_at | NCRNA00105 | NM_025091 | 80161     | Hs.521856            | 1.259724536  | 7.381209612 | 6.121485076 |
| 87100_at     | ABHD2      | AI832249  | 11057     | Hs.122337, Hs.705984 | -1.259557689 | 6.961745523 | 8.221303211 |
| 216695_s_at  | TNKS       | AF082559  | 8658      | Hs.370267            | -1.258755583 | 5.214286589 | 6.473042172 |
| 235011_at    | MAP3K2     | BG504375  | 10746     | Hs.145605            | -1.258156045 | 4.88330884  | 6.141464885 |
| 213948_x_at  | CADM3      | AI564838  | 57863     | Hs.365689            | -1.257122804 | 6.25999701  | 7.517119814 |
| 206275_s_at  | MICAL2     | NM_014632 | 9645      | Hs.501928            | -1.256421864 | 7.383157157 | 8.639579022 |
| 238134_at    |            | AW885748  |           |                      | -1.255656517 | 4.833445969 | 6.089102486 |
| 1553536_at   | MBNL2      | NM_018615 | 10150     | Hs.657347            | -1.255444675 | 6.69745415  | 7.952898825 |
| 1555337_a_at | ZNF317     | AF307097  | 57693     | Hs.465829            | -1.255186312 | 4.973819562 | 6.229005874 |
| 225820_at    | PHF17      | AV646599  | 79960     | Hs.12420             | -1.254515265 | 8.570024496 | 9.824539762 |
| 235596_at    |            | BE562520  |           |                      | -1.254299623 | 6.569569981 | 7.823869604 |
| 220467_at    |            | NM_025032 |           |                      | -1.253477057 | 5.402124356 | 6.655601413 |
| 234562_x_at  |            | AK000115  |           |                      | -1.252419832 | 5.939184337 | 7.191604169 |
| 242732_at    |            | BG010493  |           |                      | -1.252289194 | 5.66992188  | 6.922211074 |
| 232903_at    |            | BF680284  |           |                      | -1.251966417 | 6.659007274 | 7.910973691 |
| 214773_x_at  | TIPRL      | AI983505  | 261726    | Hs.209431            | -1.251865029 | 7.543997577 | 8.795862606 |
| 1558504_at   |            | AF086554  |           |                      | -1.251814583 | 5.906413795 | 7.158228377 |
| 232400_at    |            | AA703174  |           |                      | -1.251651944 | 5.440976177 | 6.692628121 |
| 221064_s_at  | UNKL       | NM_023076 | 64718     | Hs.643536            | -1.251373937 | 9.193204805 | 10.44457874 |
| 242135_at    |            | AA927533  |           |                      | -1.250508734 | 7.115018802 | 8.365527535 |
| 1560250_s_at | LOC284242  | BC035844  | 284242    | Hs.714049            | -1.250284436 | 4.90895327  | 6.159237706 |
| 1558697_a_at | KIAA0430   | BI600341  | 9665      | Hs.173524            | -1.249537595 | 5.476297253 | 6.725834848 |
| 236961_at    |            | AI539426  |           |                      | -1.249468643 | 5.351842669 | 6.601311312 |
| 214314_s_at  | EIF5B      | BE138647  | 9669      | Hs.158688            | 1.247581563  | 11.13272449 | 9.885142925 |
| 200767_s_at  | FAM120A    | NM_014612 | 23196     | Hs.372003, Hs.707324 | -1.246824687 | 8.280440254 | 9.527264941 |
| 244187_at    |            | AA053853  |           |                      | -1.246584775 | 7.049689346 | 8.296274121 |
| 239432_at    | FLJ31306   | AV729086  | 379025    | Hs.531089            | -1.245967111 | 5.894793037 | 7.140760148 |
| 217662_x_at  |            | AI393960  |           |                      | -1.245743312 | 5.880596074 | 7.126339386 |
| 217486_s_at  | ZDHHC17    | AF161412  | 23390     | Hs.4014              | -1.244288545 | 6.005595305 | 7.24988385  |



|              |           |           |        |                             |              |             |             |
|--------------|-----------|-----------|--------|-----------------------------|--------------|-------------|-------------|
| 228686_at    | FLJ33630  | BE217923  | 644873 | Hs.340623                   | -1.242926601 | 7.299788507 | 8.542715108 |
| 241669_x_at  | PRKD2     | AI251399  | 25865  | Hs.466987                   | 1.242876512  | 7.313319262 | 6.070442751 |
| 206471_s_at  | PLXNC1    | NM_005761 | 10154  | Hs.584845                   | -1.24191349  | 5.615696409 | 6.857609899 |
| 204864_s_at  | IL6ST     | NM_002184 | 3572   | Hs.532082                   | -1.241806295 | 8.056579546 | 9.298385842 |
| 240018_at    |           | AI733650  |        |                             | -1.241461193 | 4.795983235 | 6.037444428 |
| 204375_at    | CLSTN3    | NM_014718 | 9746   | Hs.535378                   | 1.241391519  | 6.491452871 | 5.250061351 |
| 209151_x_at  | TCF3      | AA768906  | 6929   | Hs.371282                   | -1.241146711 | 5.390795232 | 6.631941943 |
| 234332_at    | NUB1      | AK026433  | 51667  | Hs.647082                   | -1.239623331 | 8.449821203 | 9.689444534 |
| 1568877_a_at | ACBD5     | BC025309  | 91452  | Hs.530597                   | -1.23950849  | 7.429406258 | 8.668914748 |
| 1564002_a_at | AKD1      | AK092103  | 221264 | Hs.205144, Hs.335027, Hs.48 | -1.238809808 | 7.294745166 | 8.533554974 |
| 219754_at    | RBM41     | NM_018301 | 55285  | Hs.139053                   | -1.238478727 | 6.874635594 | 8.113114321 |
| 222907_x_at  | TMEM50B   | BC000569  | 757    | Hs.433668                   | -1.237545597 | 8.392375559 | 9.629921156 |
| 216427_at    |           | AK026439  |        |                             | 1.237272718  | 6.917435229 | 5.680162511 |
| 241854_at    | DNASE1    | AI129699  | 1773   | Hs.629638                   | -1.237139666 | 5.540625909 | 6.77765575  |
| 230702_at    | C8orf16   | BE674736  | 83735  | Hs.660259                   | -1.235474495 | 5.470517784 | 6.705992279 |
| 1559410_at   |           | AA524609  |        |                             | -1.235268437 | 4.854710072 | 6.089978509 |
| 1557170_at   | NEK8      | AI073943  | 284086 | Hs.448468                   | 1.233523415  | 6.82009534  | 5.586571925 |
| 201777_s_at  | KIAA0494  | BC002525  | 9813   | Hs.719205                   | -1.233078125 | 9.328622138 | 10.56170026 |
| 212759_s_at  | TCF7L2    | AI703074  | 6934   | Hs.593995                   | -1.232080465 | 8.75829186  | 9.990372325 |
| 213873_at    | DCBLD2    | D29810    | 131566 | Hs.203691                   | -1.230928759 | 8.268502746 | 9.499431505 |
| 1561092_at   |           | AL833766  |        |                             | -1.230445525 | 4.806998903 | 6.037444428 |
| 224588_at    | XIST      | AA167449  | 7503   | Hs.529901                   | -1.230354336 | 10.4825189  | 11.71287324 |
| 240859_at    | ZFYVE16   | N20928    | 9765   | Hs.482660, Hs.660410        | -1.230285734 | 5.664102642 | 6.894388376 |
| 231366_at    | FDPSL2A   | AI190575  | 619190 |                             | -1.230179283 | 5.323062461 | 6.553241744 |
| 227297_at    | ITGA9     | AI479176  | 3680   | Hs.113157                   | 1.229328449  | 6.251649158 | 5.022320709 |
| 201109_s_at  | THBS1     | AV726673  | 7057   | Hs.164226                   | -1.229070428 | 7.262168885 | 8.491239313 |
| 221041_s_at  | SLC17A5   | NM_012434 | 26503  | Hs.597422                   | -1.228689335 | 5.8585053   | 7.087194635 |
| 230441_at    | PLEKHG4B  | AI890356  | 153478 | Hs.535800                   | 1.228310028  | 6.012921988 | 4.78461196  |
| 209610_s_at  | SLC1A4    | BF340083  | 6509   | Hs.654352                   | 1.227338456  | 9.100758195 | 7.873419739 |
| 240286_at    |           | AL041745  |        |                             | 1.227265608  | 8.110074193 | 6.882808585 |
| 239331_at    |           | AW954199  |        |                             | -1.226576333 | 8.160243922 | 9.386820255 |
| 1555559_s_at | USP25     | AF419247  | 29761  | Hs.473370                   | -1.225232664 | 5.442351442 | 6.667584106 |
| 1569495_at   | SCLT1     | BC040258  | 132320 | Hs.654690                   | -1.225037379 | 4.852105883 | 6.077143262 |
| 201110_s_at  | THBS1     | NM_003246 | 7057   | Hs.164226                   | -1.224529751 | 8.270543949 | 9.4950737   |
| 214631_at    | ZBTB33    | BG391005  | 10009  | Hs.143604                   | -1.224018717 | 5.022082646 | 6.246101363 |
| 217614_at    |           | AI439416  |        |                             | -1.223420824 | 6.353475987 | 7.576896811 |
| 228801_at    | ORMDL1    | AI809749  | 94101  | Hs.709387                   | -1.223415107 | 5.699803711 | 6.923218818 |
| 203666_at    | CXCL12    | NM_000609 | 6387   | Hs.522891                   | 1.223158718  | 7.43613024  | 6.212971522 |
| 240636_at    |           | AI221207  |        |                             | -1.222310462 | 4.832510747 | 6.054821209 |
| 1558041_a_at | KIAA0895L | AL834156  | 653319 | Hs.651201                   | 1.221575843  | 9.012496632 | 7.790920788 |
| 236346_at    |           | BF115793  |        |                             | -1.220996546 | 7.28023109  | 8.501227636 |
| 239926_at    |           | AI675753  |        |                             | -1.220934893 | 5.29348188  | 6.514416772 |
| 227487_s_at  | SERPINE2  | AI359165  | 5270   | Hs.38449, Hs.708453         | -1.220558033 | 6.069027779 | 7.289585811 |

|              |          |           |        |                      |              |             |             |
|--------------|----------|-----------|--------|----------------------|--------------|-------------|-------------|
| 204560_at    | FKBP5    | NM_004117 | 2289   | Hs.407190            | -1.220495145 | 10.12412354 | 11.34461868 |
| 200671_s_at  | SPTBN1   | N92501    | 6711   | Hs.503178, Hs.705692 | -1.220391676 | 8.383179947 | 9.603571623 |
| 211086_x_at  | NEK1     | Z25431    | 4750   | Hs.481181            | -1.218813548 | 7.544268905 | 8.763082453 |
| 236134_at    | DCAF7    | AA769995  | 10238  | Hs.410596            | -1.21796388  | 5.294754063 | 6.512717943 |
| 224877_s_at  | MRPS5    | BE970056  | 64969  | Hs.655259            | -1.217912651 | 7.698383356 | 8.916296008 |
| 201996_s_at  | SPEN     | AL524033  | 23013  | Hs.558463            | -1.21755908  | 8.411866364 | 9.629425444 |
| 226975_at    | RNPC3    | BF116157  | 55599  | Hs.632423, Hs.632430 | -1.217488424 | 7.647396111 | 8.864884535 |
| 222146_s_at  | TCF4     | AK026674  | 6925   | Hs.605153            | -1.217415705 | 8.166280876 | 9.383696582 |
| 214854_at    |          | AC004490  |        |                      | -1.216781202 | 5.936940748 | 7.15372195  |
| 223746_at    | STK4     | BC005231  | 6789   | Hs.472838            | -1.216693481 | 5.756059085 | 6.972752567 |
| 243694_at    |          | BE551421  |        |                      | -1.216581651 | 6.447572496 | 7.664154147 |
| 230703_at    |          | AA001543  |        |                      | -1.216010989 | 4.887190386 | 6.103201375 |
| 236545_at    |          | AA532718  |        |                      | -1.215366914 | 6.081367618 | 7.296734531 |
| 242712_x_at  |          | BE856960  |        |                      | -1.215191328 | 6.915822595 | 8.131013923 |
| 242445_at    | FGD4     | AA296351  | 121512 | Hs.117835            | -1.214499234 | 5.058453697 | 6.272952931 |
| 223113_at    | TMEM138  | AF151030  | 51524  | Hs.406530            | 1.214222969  | 10.65285711 | 9.438634137 |
| 230058_at    |          | AI738717  |        |                      | -1.213667313 | 5.880434779 | 7.094102092 |
| 207983_s_at  | STAG2    | NM_006603 | 10735  | Hs.496710, Hs.624663 | -1.213032827 | 8.829926549 | 10.04295938 |
| 227101_at    | ZNF800   | AF218032  | 168850 | Hs.159006            | -1.212384156 | 9.00087136  | 10.21325552 |
| 228246_s_at  | SPTBN1   | AA772306  | 6711   | Hs.503178, Hs.705692 | -1.212214627 | 6.143651297 | 7.355865924 |
| 242407_at    |          | H71242    |        |                      | -1.212009645 | 6.405516093 | 7.617525738 |
| 215888_at    | PDS5B    | AK026889  | 23047  | Hs.716441            | -1.211949745 | 4.884105278 | 6.096055023 |
| 213016_at    | BBX      | AA573805  | 56987  | Hs.124366            | -1.211928276 | 8.444417813 | 9.656346089 |
| 1569025_s_at | FAM13A   | BC041029  | 10144  | Hs.97270             | -1.211607149 | 7.282089532 | 8.493696681 |
| 210180_s_at  | TRA2B    | U87836    | 6434   | Hs.533122            | -1.211530869 | 9.987273173 | 11.19880404 |
| 214242_at    | MAN1A2   | AI189305  | 10905  | Hs.435938            | -1.211268482 | 6.37878693  | 7.590055413 |
| 224250_s_at  | SECISBP2 | BC001189  | 79048  | Hs.59804             | -1.211169801 | 8.775222953 | 9.986392754 |
| 227658_s_at  | PLEKHA3  | BE550332  | 65977  | Hs.41086             | -1.210950405 | 6.668222252 | 7.879172657 |
| 201945_at    | FURIN    | NM_002569 | 5045   | Hs.513153            | -1.210282222 | 9.358836937 | 10.56911916 |
| 232964_at    | SPDYE1   | AL137266  | 285955 | Hs.645483            | -1.210101775 | 6.704862552 | 7.914964327 |
| 213406_at    | WSB1     | AA521269  | 26118  | Hs.446017            | -1.209096407 | 7.36565777  | 8.574754176 |
| 203656_at    | FIG4     | NM_014845 | 9896   | Hs.529959            | 1.208976164  | 10.80064126 | 9.5916651   |
| 230260_s_at  | RFTN1    | BF434651  | 23180  | Hs.98910             | -1.208490406 | 4.82985972  | 6.038350125 |
| 213326_at    | VAMP1    | AU150319  | 6843   | Hs.20021             | 1.208381205  | 10.13187003 | 8.923488822 |
| 236571_at    |          | AW197431  |        |                      | -1.208242986 | 5.093754497 | 6.301997483 |
| 221496_s_at  | TOB2     | D64109    | 10766  | Hs.719120            | -1.207811872 | 5.896805129 | 7.104617001 |
| 244881_at    | LMLN     | AA629059  | 89782  | Hs.518540            | -1.207377441 | 8.43863873  | 9.646016171 |
| 1552695_a_at | SLC2A13  | NM_052885 | 114134 | Hs.558595            | -1.207167514 | 6.213720364 | 7.420887878 |
| 236862_at    | GOPC     | AA279958  | 57120  | Hs.191539            | -1.206845994 | 5.194702386 | 6.401548379 |
| 228156_at    |          | AW342078  |        |                      | -1.206782376 | 7.172868499 | 8.379650875 |
| 1556449_at   |          | BM717927  |        |                      | 1.206258961  | 7.940637822 | 6.73437886  |
| 227121_at    |          | BF476076  |        |                      | -1.205725163 | 6.91129401  | 8.117019172 |
| 239817_at    |          | AI803727  |        |                      | -1.204898247 | 5.013807335 | 6.218705582 |

|              |           |           |        |                      |              |             |             |
|--------------|-----------|-----------|--------|----------------------|--------------|-------------|-------------|
| 228209_at    |           | AI147033  |        |                      | 1.204649986  | 8.49536075  | 7.290710765 |
| 223123_s_at  | C1orf128  | AI867781  | 57095  | Hs.31819             | -1.20429164  | 6.700675323 | 7.904966963 |
| 203007_x_at  | LYPLA1    | AF077198  | 10434  | Hs.435850            | -1.204095391 | 9.056644086 | 10.26073948 |
| 235859_at    | MLL3      | BE551763  | 58508  | Hs.647120            | -1.203962214 | 5.023903365 | 6.227865579 |
| 219600_s_at  | TMEM50B   | NM_006134 | 757    | Hs.433668            | -1.203185826 | 9.850060069 | 11.0532459  |
| 204827_s_at  | CCNF      | U17105    | 899    | Hs.1973              | -1.202896281 | 6.057993637 | 7.260889918 |
| 236181_at    |           | R38704    |        |                      | -1.202617583 | 5.82727925  | 7.029896833 |
| 217506_at    | LOC339290 | H49382    | 339290 | Hs.643553, Hs.700799 | -1.202553835 | 5.131655531 | 6.334209366 |
| 232614_at    |           | AU146963  |        |                      | -1.202384826 | 4.934928269 | 6.137313095 |
| 201646_at    | SCARB2    | AA885297  | 950    | Hs.349656, Hs.714206 | -1.202359567 | 8.991974187 | 10.19433375 |
| 240089_at    |           | BF508868  |        |                      | -1.202307656 | 5.643250693 | 6.84555835  |
| 227953_at    | CMTM6     | AW301108  | 54918  | Hs.380627, Hs.440494 | -1.202296685 | 8.736631384 | 9.938928069 |
| 1557289_s_at | GTF2IRD2  | BU617476  | 84163  | Hs.647017, Hs.647039 | -1.202126743 | 5.095155513 | 6.297282256 |
| 222626_at    | RBM26     | T79937    | 64062  | Hs.558528            | -1.202046023 | 8.757635933 | 9.959681956 |
| 204074_s_at  | KIAA0562  | AI936976  | 9731   | Hs.133089, Hs.509017 | -1.201861866 | 8.660638477 | 9.862500343 |
| 1569540_at   |           | BC035958  |        |                      | -1.201732398 | 5.489338383 | 6.691070781 |
| 243141_at    | SGMS2     | D31421    | 166929 | Hs.595423            | -1.201118405 | 7.955217889 | 9.156336294 |
| 226931_at    | TMTC1     | AU151239  | 83857  | Hs.401954            | -1.198407945 | 8.358756888 | 9.557164833 |
| 209920_at    | BMPR2     | U20165    | 659    | Hs.471119            | -1.198122957 | 7.918085237 | 9.116208194 |
| 232421_at    | SCARB1    | AV703311  | 949    | Hs.709216            | -1.197433272 | 6.10514764  | 7.302580913 |
| 238346_s_at  | TGS1      | AW973003  | 96764  | Hs.335068            | -1.196925592 | 10.20048162 | 11.39740721 |
| 208790_s_at  | PTRF      | AF312393  | 284119 | Hs.437191            | -1.196656154 | 10.08624705 | 11.2829032  |
| 233416_at    |           | AU144915  |        |                      | 1.195457405  | 6.277267029 | 5.081809624 |
| 1552610_a_at | JAK1      | NM_002227 | 3716   | Hs.207538            | -1.195044495 | 9.100185924 | 10.29523042 |
| 238811_at    | ATP11B    | AA639797  | 23200  | Hs.478429            | -1.194310825 | 6.960158825 | 8.154469651 |
| 208451_s_at  |           | NM_000592 |        |                      | 1.194280369  | 6.500061922 | 5.305781553 |
| 242579_at    | BMPR1B    | AA935461  | 658    | Hs.598475            | -1.19425234  | 6.877913418 | 8.072165758 |
| 206127_at    | ELK3      | NM_005230 | 2004   | Hs.46523             | -1.19378769  | 6.114514637 | 7.308302326 |
| 1555240_s_at | GNG12     | AF493879  | 55970  | Hs.431101            | -1.193032829 | 6.914955416 | 8.107988246 |
| 201779_s_at  | RNF13     | AF070558  | 11342  | Hs.12333, Hs.712766  | -1.192853275 | 9.71767379  | 10.91052706 |
| 206917_at    | GNA13     | NM_006572 | 10672  | Hs.515018            | -1.192558952 | 5.083343458 | 6.27590241  |
| 235294_at    | SIKE1     | AV685172  | 80143  | Hs.709277            | -1.192511141 | 6.606318377 | 7.798829518 |
| 213593_s_at  | TRA2A     | AW978896  | 29896  | Hs.445652            | -1.191966927 | 5.292190284 | 6.484157212 |
| 237067_at    |           | C15240    |        |                      | -1.191864431 | 6.246314127 | 7.438178558 |
| 212529_at    | LSM12     | BF197707  | 124801 | Hs.355570            | -1.191847768 | 9.869532566 | 11.06138033 |
| 217856_at    | RBM8A     | AF182415  | 9939   | Hs.356873            | -1.191407806 | 9.252267297 | 10.4436751  |
| 222640_at    | DNMT3A    | N26002    | 1788   | Hs.515840            | 1.190433829  | 9.434465588 | 8.24403176  |
| 221628_s_at  | GLYR1     | AF326966  | 84656  | Hs.387255            | -1.189744348 | 5.323539257 | 6.513283605 |
| 202316_x_at  | UBE4B     | AW241715  | 10277  | Hs.632370            | -1.189256871 | 8.877607864 | 10.06686473 |
| 233037_at    |           | AF138859  |        |                      | -1.188567049 | 5.136609704 | 6.325176754 |
| 1560622_at   |           | AK000203  |        |                      | -1.188207507 | 7.451913439 | 8.640120946 |
| 238758_at    |           | AA749253  |        |                      | 1.187417206  | 8.004521779 | 6.817104573 |
| 233211_at    | MTBP      | AK022122  | 27085  | Hs.657656            | -1.187394621 | 4.89753711  | 6.084931731 |

|              |           |           |        |                      |              |             |             |
|--------------|-----------|-----------|--------|----------------------|--------------|-------------|-------------|
| 1559585_at   | DDX60L    | AK096369  | 91351  | Hs.535011            | -1.187243327 | 5.427466588 | 6.614709915 |
| 236749_at    | MNT       | AI968443  | 4335   | Hs.626579, Hs.632239 | 1.187240077  | 6.448684572 | 5.261444496 |
| 241867_at    |           | BE676407  |        |                      | -1.187113023 | 5.727376137 | 6.914489161 |
| 210894_s_at  | CEP250    | BC001433  | 11190  | Hs.443976            | -1.187075557 | 5.035280862 | 6.222356432 |
| 236816_at    | C12orf30  | BF110370  | 80018  | Hs.530941            | -1.1870205   | 6.559902881 | 7.746923381 |
| 239415_at    | MAP9      | AW117322  | 79884  | Hs.61271             | -1.18609863  | 5.717412865 | 6.903511496 |
| 233261_at    | EBF1      | AU145682  | 1879   | Hs.573143            | -1.186014341 | 5.967863617 | 7.153877959 |
| 202368_s_at  | TRAM2     | AI986461  | 9697   | Hs.520182            | -1.184758078 | 7.853303632 | 9.038061711 |
| 1556131_s_at | FBF1      | AK074045  | 85302  | Hs.442609            | 1.184560994  | 7.996397037 | 6.811836043 |
| 229389_at    | ATG16L2   | AA741058  | 89849  | Hs.653186            | -1.184418848 | 5.113123688 | 6.297542537 |
| 230515_at    |           | AF138861  |        |                      | -1.183615377 | 5.536785598 | 6.720400975 |
| 1555139_a_at | OTUD7B    | BC020622  | 56957  | Hs.98322             | -1.183509836 | 5.455561461 | 6.639071297 |
| 233538_s_at  | CYBB      | AI203028  | 1536   | Hs.292356            | -1.183313214 | 5.790880398 | 6.974193612 |
| 229098_s_at  | DDX46     | N76126    | 9879   | Hs.406549            | -1.182956692 | 7.93109123  | 9.114047922 |
| 201591_s_at  | NISCH     | NM_007184 | 11188  | Hs.435290            | 1.182719066  | 10.60026522 | 9.417546158 |
| 1554518_at   | GSTCD     | BC032942  | 79807  | Hs.161429            | -1.181895469 | 5.531468177 | 6.713363645 |
| 232864_s_at  | AFF4      | N59653    | 27125  | Hs.519313, Hs.664840 | -1.181596755 | 7.698507512 | 8.880104267 |
| 204755_x_at  | HLF       | M95585    | 3131   | Hs.196952            | -1.181343251 | 4.915929962 | 6.097273213 |
| 211048_s_at  | PDIA4     | BC006344  | 9601   | Hs.93659             | -1.181256286 | 9.630320968 | 10.81157725 |
| 223134_at    | BBX       | AI795970  | 56987  | Hs.124366            | -1.181190421 | 9.216096486 | 10.39728691 |
| 236869_at    |           | AI857429  |        |                      | -1.180841159 | 6.002515069 | 7.183356228 |
| 238644_at    | MYSM1     | BF511190  | 114803 | Hs.709264            | -1.180675251 | 7.49067548  | 8.671350731 |
| 1553530_a_at | ITGB1     | NM_033669 | 3688   | Hs.643813            | -1.177746884 | 10.02077907 | 11.19852595 |
| 243934_at    | ODF3B     | AW139261  | 440836 | Hs.531314            | -1.176358966 | 5.056449625 | 6.23280859  |
| 239784_at    |           | AA398740  |        |                      | -1.175682184 | 5.345803849 | 6.521486034 |
| 201752_s_at  | ADD3      | AI763123  | 120    | Hs.501012            | -1.175645518 | 5.265390396 | 6.441035914 |
| 238092_at    |           | AI277300  |        |                      | 1.174928771  | 6.526182235 | 5.351253464 |
| 203753_at    | TCF4      | NM_003199 | 6925   | Hs.605153            | -1.174596003 | 9.267779166 | 10.44237517 |
| 210281_s_at  | ZMYM2     | AL136621  | 7750   | Hs.644041            | -1.174065352 | 6.06336342  | 7.237428772 |
| 238797_at    | TRIM11    | BF059582  | 81559  | Hs.13543             | -1.174024427 | 6.242184942 | 7.416209369 |
| 209398_at    | HIST1H1C  | BC002649  | 3006   | Hs.7644              | -1.17359981  | 9.056608294 | 10.2302081  |
| 235421_at    | MAP3K8    | AV713062  | 1326   | Hs.432453            | -1.173349332 | 6.470630971 | 7.643980304 |
| 207645_s_at  | CHD1L     | NM_004284 | 9557   | Hs.191164            | -1.173108528 | 6.500061922 | 7.67317045  |
| 228098_s_at  | MYLIP     | AW292746  | 29116  | Hs.484738            | -1.172870325 | 6.950551076 | 8.123421401 |
| 1555894_s_at | MTSS1L    | AA829283  | 92154  | Hs.432387            | -1.172866529 | 7.579656684 | 8.752523213 |
| 233324_at    | TRERF1    | AK002096  | 55809  | Hs.485392            | -1.172739551 | 5.86211767  | 7.034857221 |
| 210760_x_at  | TRIP11    | BC002656  | 9321   | Hs.632339            | -1.172324699 | 6.471454891 | 7.64377959  |
| 210477_x_at  | MAPK8     | U34822    | 5599   | Hs.138211            | -1.17214092  | 5.641476516 | 6.813617436 |
| 229775_s_at  |           | AI480107  |        |                      | -1.172059887 | 6.843338105 | 8.015397992 |
| 238589_s_at  |           | AW601184  |        |                      | -1.1719212   | 5.782432637 | 6.954353836 |
| 233819_s_at  | RNF160    | AK023499  | 26046  | Hs.288773            | -1.171812345 | 9.542989372 | 10.71480172 |
| 221579_s_at  | NUDT3     | AF062530  | 11165  | Hs.188882            | -1.171722452 | 9.577847723 | 10.74957017 |
| 1561402_at   | LOC339894 | BC040669  | 339894 | Hs.478050, Hs.634263 | 1.170809059  | 7.103608773 | 5.932799714 |

|              |           |           |                            |              |             |             |
|--------------|-----------|-----------|----------------------------|--------------|-------------|-------------|
| 212994_at    | THOC2     | BE543527  | 57187 Hs.592243            | -1.170720822 | 9.126475281 | 10.2971961  |
| 201445_at    | CNN3      | NM_001839 | 1266 Hs.706617             | -1.170547404 | 7.256472918 | 8.427020323 |
| 212384_at    | BAT1      | AI282485  | 7919 Hs.254042             | -1.170311087 | 5.717783338 | 6.888094425 |
| 206748_s_at  | SPAG9     | NM_003971 | 9043 Hs.463439             | -1.170172224 | 6.841740356 | 8.011912596 |
| 1556319_at   | LOC283270 | BQ025632  | 283270 Hs.629770           | 1.170009719  | 7.032000849 | 5.861991129 |
| 1555830_s_at | ESYT2     | BC001224  | 57488 Hs.490795            | -1.169470927 | 6.402483796 | 7.571954723 |
| 229178_at    | PRTG      | AV699825  | 283659 Hs.130957           | -1.169051724 | 6.964032812 | 8.133084536 |
| 237215_s_at  | TFRC      | N76327    | 7037 Hs.529618, Hs.592950  | -1.168431376 | 8.097923099 | 9.266354476 |
| 1566558_x_at | FLJ90757  | AK096609  | 440465 Hs.448889           | 1.167704884  | 8.789440804 | 7.62173592  |
| 208442_s_at  | ATM       | NM_000051 | 472 Hs.367437              | 1.16732556   | 7.466357749 | 6.299032189 |
| 229791_at    | LPCAT2    | N32611    | 54947 Hs.460857            | -1.167015769 | 6.763945407 | 7.930961176 |
| 202269_x_at  | GBP1      | BC002666  | 2633 Hs.62661              | -1.166527534 | 7.983228979 | 9.149756513 |
| 215177_s_at  | ITGA6     | AV733308  | 3655 Hs.133397             | -1.166306342 | 8.362825244 | 9.529131586 |
| 1556630_at   | CASC2     | AJ344228  | 255082 Hs.89387            | 1.1662018    | 6.846822743 | 5.680620943 |
| 1555450_a_at | NARG1L    | BC032318  | 79612 Hs.512914            | -1.166151909 | 6.268653319 | 7.434805229 |
| 242862_x_at  |           | AI804210  |                            | -1.166061899 | 5.742489462 | 6.908551362 |
| 226492_at    | SEMA6D    | AL036088  | 80031 Hs.511265            | 1.166035297  | 8.621284308 | 7.455249011 |
| 203413_at    | NELL2     | NM_006159 | 4753 Hs.505326             | 1.165016979  | 7.611218536 | 6.446201557 |
| 229890_at    | PRRT1     | AI799702  | 80863 Hs.549204, Hs.699821 | 1.164904272  | 8.2761271   | 7.111222828 |
| 233823_at    | FAM184B   | AB033102  | 27146 Hs.18861             | -1.164791014 | 6.966147651 | 8.130938666 |
| 209087_x_at  | MCCAM     | AF089868  | 4162 Hs.599039             | 1.164719832  | 10.42360383 | 9.258884001 |
| 201562_s_at  | SORD      | NM_003104 | 6652 Hs.633539, Hs.878     | -1.164296133 | 9.844988481 | 11.00928461 |
| 215092_s_at  | NFAT5     | AJ005683  | 10725 Hs.371987            | -1.164000592 | 8.557196417 | 9.721197008 |
| 1569676_at   |           | BC024226  |                            | -1.16330666  | 5.585171822 | 6.748478482 |
| 210916_s_at  | CD44      | AF098641  | 960 Hs.502328              | -1.162849873 | 9.540344467 | 10.70319434 |
| 203220_s_at  | TLE1      | AI951720  | 7088 Hs.197320, Hs.689805  | -1.161626979 | 5.162336948 | 6.323963926 |
| 209193_at    | PIM1      | M24779    | 5292 Hs.81170              | -1.161050171 | 9.079284054 | 10.24033422 |
| 230663_at    |           | AI741025  |                            | -1.160903725 | 7.318451292 | 8.479355017 |
| 219501_at    | ENOX1     | NM_017993 | 55068 Hs.128258, Hs.711520 | 1.160780977  | 8.881411729 | 7.720630752 |
| 210581_x_at  | PATZ1     | AF254088  | 23598 Hs.517557            | -1.160749874 | 4.983116906 | 6.14386678  |
| 228288_at    |           | AA772299  |                            | -1.160693687 | 5.977532407 | 7.138226094 |
| 212926_at    | SMC5      | AW183677  | 23137 Hs.534189, Hs.601181 | -1.160577692 | 7.129263903 | 8.289841595 |
| 234681_s_at  | CHD6      | AK026022  | 84181 Hs.371979            | -1.159752684 | 5.350089886 | 6.509842571 |
| 227661_at    | ANKRD11   | BF195623  | 29123 Hs.335003            | -1.159651445 | 6.104372771 | 7.264024216 |
| 205945_at    | IL6R      | NM_000565 | 3570 Hs.709210             | -1.15946672  | 9.514024774 | 10.67349149 |
| 225551_at    | C1orf71   | AW291187  | 163882 Hs.368353           | -1.159167135 | 6.098348377 | 7.257515512 |
| 230127_at    |           | AW044663  |                            | 1.158617937  | 10.54189092 | 9.383272984 |
| 215248_at    | GRB10     | AU145003  | 2887 Hs.164060             | -1.158568783 | 5.677737007 | 6.83630579  |
| 235000_at    |           | T86629    |                            | -1.158093066 | 7.786902598 | 8.944995664 |
| 1553130_at   | PRO0461   | NM_152340 | 652276 Hs.459691, Hs.61960 | -1.157040177 | 5.299825108 | 6.456865285 |
| 242776_at    | ZCCHC6    | AA584428  | 79670 Hs.655162            | -1.156793655 | 7.417483109 | 8.574276764 |
| 215455_at    | TIMELESS  | AK000721  | 8914 Hs.118631             | 1.156634282  | 7.1058527   | 5.949218417 |
| 208661_s_at  | TTC3      | AW510696  | 7267 Hs.368214             | -1.156440801 | 9.348153168 | 10.50459397 |

|              |             |           |        |                             |              |             |             |
|--------------|-------------|-----------|--------|-----------------------------|--------------|-------------|-------------|
| 230533_at    | ZMYND8      | AF144233  | 23613  | Hs.446240, Hs.658553, Hs.66 | -1.156402975 | 6.077143262 | 7.233546237 |
| 241885_at    |             | BF431050  |        |                             | -1.15635908  | 6.366522638 | 7.522881718 |
| 206562_s_at  | CSNK1A1     | NM_001892 | 1452   | Hs.529862, Hs.712555        | -1.156355861 | 10.63267874 | 11.7890346  |
| 224766_at    | RPL37       | AW008221  | 6167   | Hs.558601, Hs.80545         | -1.156039243 | 8.613309763 | 9.769349006 |
| 1559227_s_at | VHL         | BF972755  | 7428   | Hs.517792                   | -1.155910729 | 6.412821293 | 7.568732022 |
| 223189_x_at  | MLL5        | AW082219  | 55904  | Hs.592262                   | -1.154969118 | 8.541172773 | 9.696141891 |
| 219492_at    | CHIC2       | NM_012110 | 26511  | Hs.335393                   | -1.154620338 | 9.532991644 | 10.68761198 |
| 216959_x_at  | NRCAM       | U55258    | 4897   | Hs.21422                    | -1.154215571 | 6.767805917 | 7.922021488 |
| 235606_at    | LOC344595   | AA417117  | 344595 | Hs.543039, Hs.655735        | -1.153747875 | 5.740830273 | 6.894578149 |
| 216226_at    | TAF4B       | Y09321    | 6875   | Hs.369519                   | -1.153703074 | 6.588978277 | 7.742681351 |
| 213665_at    | SOX4        | AI989477  | 6659   | Hs.643910                   | -1.653483857 | 7.0201211   | 8.673604956 |
| 202924_s_at  | PLAGL2      | AL562280  | 5326   | Hs.154104                   | -1.153310417 | 8.807130149 | 7.653819732 |
| 1557810_at   |             | BM352108  |        |                             | -1.153264388 | 4.889067029 | 6.042331417 |
| 201123_s_at  | EIF5A       | NM_001970 | 1984   | Hs.534314                   | -1.153251743 | 9.949386627 | 11.10263837 |
| 244871_s_at  | USP32       | AW268357  | 84669  | Hs.132868                   | -1.153068914 | 6.988739437 | 8.141808351 |
| 202062_s_at  | SEL1L       | NM_005065 | 6400   | Hs.181300                   | -1.152248242 | 7.228843116 | 8.381091358 |
| 234649_at    |             | AK026259  |        |                             | -1.151799007 | 4.981107267 | 6.132906275 |
| 227844_at    | FMNL3       | AI089932  | 91010  | Hs.179838                   | 1.151590901  | 8.206351136 | 7.054760236 |
| 239923_at    |             | AI056872  |        |                             | -1.151577236 | 5.105399744 | 6.25697698  |
| 202479_s_at  | TRIB2       | BC002637  | 28951  | Hs.467751                   | -1.151444269 | 6.520008055 | 7.671452324 |
| 229004_at    |             | AI970797  |        |                             | 1.151166849  | 6.672616852 | 5.521450002 |
| 236079_at    | DKFZp667E05 | AA649070  | 202025 | Hs.618463                   | 1.151161447  | 7.851788988 | 6.700627541 |
| 210458_s_at  | TANK        | BC003388  | 10010  | Hs.132257                   | -1.149697216 | 7.40630571  | 8.556002925 |
| 212073_at    |             | AI631874  |        |                             | -1.149620774 | 9.590006069 | 10.73962684 |
| 227016_at    | ERICH1      | AA767385  | 157697 | Hs.655310                   | -1.149422321 | 8.069909944 | 9.219332264 |
| 201741_x_at  | SFRS1       | M69040    | 6426   | Hs.68714                    | -1.149417144 | 6.210344735 | 7.359761879 |
| 214978_s_at  | PPFIA4      | AK023365  | 8497   | Hs.153648                   | 1.148808971  | 6.076095437 | 4.927286466 |
| 213650_at    |             | AW006438  |        |                             | -1.14847332  | 7.71390032  | 8.86237364  |
| 213514_s_at  | DIAPH1      | AU158818  | 1729   | Hs.529451                   | -1.148046399 | 9.846410158 | 10.99445656 |
| 228251_at    |             | BE467577  |        |                             | -1.14695428  | 6.968387823 | 8.115342102 |
| 227389_x_at  | IRF2BP2     | AA058858  | 359948 | Hs.693837                   | -1.146938481 | 6.122689733 | 7.269628215 |
| 1554249_a_at | ZNF638      | BC024000  | 27332  | Hs.434401                   | -1.146812823 | 7.64113393  | 8.787946754 |
| 35201_at     | HNRNPL      | X16135    | 3191   | Hs.644906                   | -1.146594455 | 10.56023919 | 11.70683364 |
| 232216_at    | YME1L1      | AA828049  | 10730  | Hs.499145, Hs.74647         | -1.14630936  | 4.983274136 | 6.129583496 |
| 203141_s_at  | AP3B1       | AW058575  | 8546   | Hs.532091                   | -1.145580434 | 8.0556092   | 9.201189634 |
| 240212_at    |             | AW340175  |        |                             | 1.144899172  | 6.610768788 | 5.465869616 |
| 225238_at    | MSI2        | BF435123  | 124540 | Hs.658922                   | -1.144843928 | 6.921290831 | 8.066134758 |
| 219557_s_at  | NRIP3       | NM_020645 | 56675  | Hs.523467                   | -1.144843219 | 7.579806962 | 8.724650181 |
| 1553679_s_at | VKORC1L1    | NM_173517 | 154807 | Hs.427232                   | -1.144670903 | 6.133013687 | 7.27768459  |
| 1556375_at   |             | AF086103  |        |                             | -1.144446212 | 6.347717166 | 7.492163378 |
| 213748_at    | TRIM66      | AW271713  | 9866   | Hs.130836                   | -1.143595901 | 6.660083845 | 7.803679746 |
| 208078_s_at  |             | NM_030751 |        |                             | -1.143466467 | 9.260559399 | 10.40402587 |
| 211300_s_at  | TP53        | K03199    | 7157   | Hs.654481                   |              |             |             |

|              |            |           |                             |              |             |             |
|--------------|------------|-----------|-----------------------------|--------------|-------------|-------------|
| 1554980_a_at | ATF3       | AB066566  | 467 Hs.460                  | -1.142784199 | 8.05633703  | 9.19912123  |
| 1553768_a_at | DCBLD1     | NM_173674 | 285761 Hs.658304            | -1.142292529 | 8.475646148 | 9.617938678 |
| 222568_at    | UGGT1      | AI672492  | 56886 Hs.598715, Hs.719174  | -1.142047616 | 8.037536602 | 9.179584218 |
| 227946_at    | OSBPL7     | AI955239  | 114881 Hs.463320            | 1.141531609  | 9.025213059 | 7.88368145  |
| 222540_s_at  | RSF1       | BG286920  | 51773 Hs.420229             | -1.140651611 | 9.121551772 | 10.26220338 |
| 1567105_at   |            | AF362887  |                             | -1.14051606  | 9.829839277 | 10.97035534 |
| 235693_at    |            | D81004    |                             | -1.139945225 | 7.153266995 | 8.293212221 |
| 225219_at    | SMAD5      | BF526175  | 4090 Hs.167700              | -1.139467854 | 9.903100364 | 11.04256822 |
| 226819_at    |            | AW206435  |                             | -1.139067048 | 6.829578982 | 7.968646031 |
| 41386_i_at   | KDM6B      | AB002344  | 23135 Hs.223678             | -1.138803404 | 9.91370854  | 11.05251194 |
| 1556369_a_at | PHKG2      | CA449954  | 5261 Hs.196177              | 1.138796172  | 7.456764787 | 6.317968615 |
| 204427_s_at  | TMED2      | NM_006815 | 10959 Hs.592682, Hs.75914   | -1.138238011 | 9.212481593 | 10.3507196  |
| 231643_s_at  | CMIP       | BE045541  | 80790 Hs.709248             | -1.137967303 | 7.587625753 | 8.725593056 |
| 221221_s_at  | KLHL3      | NM_017415 | 26249 Hs.655084             | 1.137721942  | 7.503638729 | 6.365916786 |
| 41037_at     | TEAD4      | U63824    | 7004 Hs.94865               | 1.137603296  | 11.9117993  | 10.774196   |
| 213875_x_at  | C6orf62    | BG252842  | 81688 Hs.519930             | -1.137555346 | 10.0933771  | 11.23093245 |
| 238937_at    | ZNF420     | AI339586  | 147923 Hs.444992            | -1.137003132 | 5.841441112 | 6.978444244 |
| 236442_at    | DPF3       | BF672019  | 8110 Hs.162868              | 1.137000722  | 6.011036696 | 4.874035975 |
| 230879_at    | BAG2       | AI654091  | 9532 Hs.719303              | -1.136997527 | 6.005796404 | 7.14279393  |
| 217465_at    | NCKAP1     | AK001291  | 10787 Hs.603732             | -1.136932714 | 9.161887382 | 10.2988201  |
| 229994_at    | NFIA       | R45950    | 4774 Hs.594180, Hs.710546   | -1.136232504 | 6.180720211 | 7.316952714 |
| 232555_at    | CREB5      | AI689210  | 9586 Hs.437075              | -1.136147837 | 5.889436923 | 7.025584761 |
| 1554629_at   | EPHA7      | BC027940  | 2045 Hs.73962               | 1.136051424  | 6.037444428 | 4.901393003 |
| 210001_s_at  | SOCS1      | AB005043  | 8651 Hs.50640               | -1.13590775  | 7.236925427 | 8.372833177 |
| 1558569_at   | UNQ6228    | AL832308  | 100131541 Hs.661972         | -1.134645678 | 6.531105528 | 7.665751206 |
| 205369_x_at  | DBT        | J03208    | 1629 Hs.709187              | -1.134343047 | 5.542124597 | 6.676467645 |
| 204324_s_at  | GOLIM4     | NM_014498 | 27333 Hs.143600             | -1.134296581 | 8.006237861 | 9.140534442 |
| 236452_at    |            | BE219380  |                             | 1.133954586  | 8.539035043 | 7.405080457 |
| 1565689_at   |            | BG400570  |                             | -1.133746245 | 5.586469947 | 6.720216192 |
| 228173_at    | GNAS       | AA810695  | 2778 Hs.125898, Hs.694849   | -1.133520972 | 6.72321671  | 7.856737683 |
| 1558732_at   | MAP4K4     | AK074900  | 9448 Hs.719073              | -1.133505191 | 6.736603028 | 7.870108219 |
| 210012_s_at  | EWSR1      | BC000527  | 2130 Hs.374477              | -1.133495693 | 5.794888094 | 6.928383787 |
| 215682_at    | LOC440792  | AB051440  | 440792 Hs.613849            | 1.132986194  | 6.197653925 | 5.064667732 |
| 230580_at    |            | AI222805  |                             | 1.132564755  | 8.335679789 | 7.203115034 |
| 210051_at    | RAPGEF3    | U78168    | 10411 Hs.8578               | 1.132216774  | 6.740095156 | 5.607878383 |
| 227992_s_at  | NCRNA00085 | AA725913  | 147650 Hs.467174            | 1.132002647  | 6.7128045   | 5.580801852 |
| 1557050_at   |            | CA448125  |                             | 1.131898222  | 7.712046871 | 6.580148649 |
| 206114_at    | EPHA4      | NM_004438 | 2043 Hs.371218              | -1.131694789 | 7.228948913 | 8.360643702 |
| 205921_s_at  | SLC6A6     | U16120    | 6533 Hs.529488              | -1.131169302 | 7.409505839 | 8.540675141 |
| 241546_at    | SPATA5     | BE550289  | 166378 Hs.709648            | -1.131028864 | 5.906641963 | 7.037670826 |
| 230256_at    | C1orf104   | AW009436  | 284618 Hs.650801, Hs.708354 | -1.130467775 | 8.433539931 | 9.564007706 |
| 241997_at    |            | AA700817  |                             | -1.130431866 | 5.85394444  | 6.984376306 |
| 206897_at    | PAGE1      | NM_003785 | 8712 Hs.128231              | 1.130132907  | 6.133013687 | 5.00288078  |

|              |              |           |           |                      |              |             |             |
|--------------|--------------|-----------|-----------|----------------------|--------------|-------------|-------------|
| 243509_at    |              | AI475680  |           |                      | -1.12976706  | 5.915903115 | 7.045670175 |
| 1552274_at   | PXK          | BC014479  | 54899     | Hs.190544            | -1.12962661  | 7.841844901 | 8.971471511 |
| 1554690_a_at | TACC1        | BC041391  | 6867      | Hs.279245            | -1.129385015 | 6.763945407 | 7.893330422 |
| 227543_at    | RNASEH2C     | AI990526  | 84153     | Hs.718438            | 1.128211336  | 9.051787571 | 7.923576235 |
| 1554489_a_at | CEP70        | BC016050  | 80321     | Hs.531962            | -1.128133931 | 8.087279621 | 9.215413551 |
| 220940_at    | ANKRD36B     | NM_025190 | 57730     | Hs.532921            | -1.127646364 | 8.144659773 | 9.272306137 |
| 217482_at    |              | AK021987  |           |                      | -1.12763544  | 6.710439581 | 7.838075021 |
| 1569104_a_at |              | BE646227  |           |                      | 1.12717116   | 7.231390103 | 6.104218942 |
| 229946_at    | FAM168B      | BF056651  | 130074    | Hs.534679            | -1.127153287 | 7.02878615  | 8.155939437 |
| 218621_at    | HEMK1        | NM_016173 | 51409     | Hs.517987, Hs.599362 | 1.127082911  | 8.980495985 | 7.853413075 |
| 229675_at    | MINA         | AA772075  | 84864     | Hs.607776            | -1.125761049 | 7.170307375 | 8.296068423 |
| 240452_at    | GSPT1        | AA580082  | 2935      | Hs.528780            | -1.125020556 | 6.465173881 | 7.590194438 |
| 241174_at    | AP4E1        | AV647279  | 23431     | Hs.413366            | -1.124638448 | 5.800571601 | 6.925210049 |
| 237310_at    |              | AI743607  |           |                      | -1.124154217 | 6.849835089 | 7.973989307 |
| 212423_at    | ZCCHC24      | AK024784  | 219654    | Hs.523080            | -1.124148873 | 6.778719864 | 7.902868737 |
| 243947_s_at  |              | AW300612  |           |                      | 1.124081647  | 8.358039712 | 7.233958065 |
| 235388_at    | CHD9         | BG538482  | 80205     | Hs.59159, Hs.622347  | -1.124057565 | 6.383368415 | 7.50742598  |
| 228392_at    | ZNF302       | BF508739  | 55900     | Hs.436350            | -1.123902548 | 5.176272549 | 6.300175097 |
| 216855_s_at  | HNRNPU       | D13413    | 3192      | Hs.106212            | -1.123176634 | 7.583653897 | 8.706830531 |
| 215533_s_at  | UBE4B        | AF091093  | 10277     | Hs.632370            | -1.12312556  | 8.839118331 | 9.962243891 |
| 230666_at    | HOXA11AS     | AA622837  | 221883    | Hs.587427            | 1.122654641  | 6.319581101 | 5.19692646  |
| 208299_at    | CACNA1I      | NM_021096 | 8911      | Hs.125116            | 1.122491039  | 6.263919567 | 5.141428528 |
| 223190_s_at  | MLL5         | AF067804  | 55904     | Hs.592262            | -1.121994727 | 9.763271702 | 10.88526643 |
| 222633_at    | TBL1XR1      | AF268193  | 79718     | Hs.715537            | -1.121927476 | 10.06428533 | 11.18621281 |
| 205405_at    | SEMA5A       | NM_003966 | 9037      | Hs.27621             | -1.121919383 | 5.972110562 | 7.094029945 |
| 224620_at    | MAPK1        | AL157438  | 5594      | Hs.431850            | 1.121688954  | 6.698811649 | 5.577122694 |
| 1558173_a_at | LUZP1        | AK093016  | 7798      | Hs.257900, Hs.654306 | -1.121601723 | 10.39964843 | 11.52125015 |
| 216023_at    | KDM4B        | AK026040  | 23030     | Hs.654816            | 1.12152018   | 6.364900723 | 5.243380543 |
| 239544_at    |              | BE671251  |           |                      | 1.121380896  | 6.56876052  | 5.447379624 |
| 224335_s_at  | BACE1        | AB050436  | 23621     | Hs.504003            | -1.121347693 | 5.973552286 | 7.09489998  |
| 223129_x_at  | MYLIP        | T63512    | 29116     | Hs.484738            | -1.12113962  | 7.84034926  | 8.96148888  |
| 233445_at    |              | AK022040  |           |                      | -1.12069458  | 6.602590633 | 7.723285214 |
| 231978_at    | TPCN2        | AL137479  | 219931    | Hs.131851            | 1.120587367  | 6.212971522 | 5.092384155 |
| 217051_s_at  | SS18         | AF257501  | 6760      | Hs.404263            | -1.120499868 | 5.703503256 | 6.824003124 |
| 219001_s_at  | DCAF10       | NM_024345 | 79269     | Hs.118394            | -1.120095396 | 7.841988137 | 8.962083532 |
| 214780_s_at  | MYO9B        | AK002201  | 4650      | Hs.123198            | 1.120057861  | 10.30493746 | 9.184879597 |
| 1555448_at   | MUDENG       | BC013174  | 55745     | Hs.597349            | -1.119159116 | 5.93564107  | 7.054800186 |
| 204543_at    | RAPGEF1      | NM_005312 | 2889      | Hs.127897            | -1.118619044 | 6.638541358 | 7.757160402 |
| 219330_at    | VANGL1       | NM_024062 | 81839     | Hs.515130            | -1.118374382 | 9.238717828 | 10.35709221 |
| 232476_at    |              | AK025105  |           |                      | -1.116669833 | 5.086756568 | 6.203426401 |
| 210971_s_at  | ARNTL        | AB000815  | 406       | Hs.65734             | -1.116629987 | 8.116210257 | 9.232840244 |
| 235792_x_at  | PIK3C2A      | AU154663  | 5286      | Hs.175343            | -1.116442706 | 8.095706301 | 9.212149007 |
| 213089_at    | LOC100272211 | AU158490  | 100272216 | Hs.631974            | -1.11644126  | 6.159871287 | 7.276312547 |



|              |          |           |        |                      |              |             |             |
|--------------|----------|-----------|--------|----------------------|--------------|-------------|-------------|
| 213596_at    | CASP4    | AL050391  | 837    | Hs.138378            | 1.116374161  | 7.508283127 | 6.391908966 |
| 207100_s_at  | VAMP1    | NM_016830 | 6843   | Hs.20021             | 1.116023271  | 8.005461624 | 6.889438353 |
| 1553668_at   | LRCH3    | NM_032773 | 84859  | Hs.518414, Hs.659335 | -1.11543427  | 5.312662236 | 6.428096505 |
| 206113_s_at  | RAB5A    | NM_004162 | 5868   | Hs.475663            | -1.115205506 | 8.348184074 | 9.46338958  |
| 204577_s_at  | CLUAP1   | NM_024793 | 23059  | Hs.155995            | -1.114931301 | 7.201045669 | 8.31597697  |
| 212019_at    | RSL1D1   | AK025446  | 26156  | Hs.401842            | -1.114516335 | 5.198614855 | 6.31313119  |
| 229293_at    |          | AI869532  |        |                      | -1.114154526 | 6.787069699 | 7.901224224 |
| 209459_s_at  | ABAT     | AF237813  | 18     | Hs.336768, Hs.715664 | 1.113421163  | 7.753278617 | 6.639857454 |
| 208584_at    | SNCG     | NM_016432 | 6623   | Hs.349470            | 1.11291753   | 6.258218625 | 5.145301096 |
| 212188_at    | KCTD12   | AA551075  | 115207 | Hs.644125            | -1.112668045 | 9.179854595 | 10.29252264 |
| 215236_s_at  | PICALM   | AV721177  | 8301   | Hs.163893            | -1.112549831 | 7.473774624 | 8.586324455 |
| 235454_at    |          | AI436561  |        |                      | -1.112471198 | 6.022107041 | 7.134578239 |
| 230838_s_at  | CIAPIN1  | AW771492  | 57019  | Hs.4900              | -1.110807286 | 6.529186568 | 7.639993854 |
| 239469_at    |          | BF513404  |        |                      | -1.110476558 | 6.107161463 | 7.217638021 |
| 237330_at    |          | AA603494  |        |                      | -1.110225782 | 6.491734723 | 7.601960506 |
| 214367_at    | RASGRP2  | AI688812  | 10235  | Hs.99491             | 1.109981295  | 6.06921853  | 4.959237235 |
| 212362_at    | ATP2A2   | AA805753  | 488    | Hs.506759            | -1.109784691 | 6.531389112 | 7.641173803 |
| 244554_at    |          | AI351179  |        |                      | -1.109049756 | 5.149571958 | 6.258621714 |
| 236853_at    | C13orf16 | AW665078  | 121793 | Hs.210677            | 1.109028146  | 6.520870466 | 5.41184232  |
| 204281_at    | TEAD4    | NM_003213 | 7004   | Hs.94865             | 1.107936166  | 12.2774153  | 11.16947914 |
| 228478_at    |          | AA889954  |        |                      | -1.107928072 | 8.516701139 | 9.624629211 |
| 226474_at    | NLRCS    | AA005023  | 84166  | Hs.528836            | 1.107020834  | 10.11188118 | 9.004860347 |
| 238517_at    |          | BF815640  |        |                      | -1.10653717  | 8.239583849 | 9.34612102  |
| 238487_at    | GNL1     | BE166476  | 2794   | Hs.83147             | -1.106090056 | 5.849643183 | 6.955733239 |
| 216531_at    | YY2      | U73479    | 404281 | Hs.443490, Hs.673601 | -1.105392742 | 4.971024847 | 6.076417588 |
| 204863_s_at  | IL6ST    | BE856546  | 3572   | Hs.532082            | -1.104929237 | 9.511862183 | 10.61679142 |
| 227478_at    | SETBP1   | BF739885  | 26040  | Hs.435458            | 1.104925976  | 9.41619897  | 8.311272993 |
| 1554451_s_at | DNAJC14  | AF141342  | 85406  | Hs.709320            | -1.10377359  | 7.480005863 | 8.583779453 |
| 1554433_a_at | ZNF146   | BC005154  | 7705   | Hs.643436            | -1.103480507 | 9.395880621 | 10.49936113 |
| 214900_at    | ZKSCAN1  | AC004522  | 7586   | Hs.615360            | -1.102826415 | 6.967525774 | 8.070352189 |
| 1560599_a_at | CCDC123  | BC020195  | 84902  | Hs.599703            | -1.102502652 | 8.207892064 | 9.310394715 |
| 219435_at    | C17orf68 | NM_025099 | 80169  | Hs.156055            | 1.102474151  | 7.828308999 | 6.725834848 |
| 241606_s_at  | TRUB1    | BE736287  | 142940 | Hs.21187             | -1.102380006 | 6.818817736 | 7.921197742 |
| 207950_s_at  | ANK3     | NM_001149 | 288    | Hs.499725            | -1.102336848 | 7.111390515 | 8.213727363 |
| 213351_s_at  | TMCC1    | AB018322  | 23023  | Hs.477547, Hs.709936 | -1.102176603 | 5.681154476 | 6.783331079 |
| 243559_at    |          | BF515306  |        |                      | -1.102000329 | 5.206730615 | 6.308730944 |
| 240246_at    |          | AW294722  |        |                      | -1.101533377 | 5.439191932 | 6.540725309 |
| 210828_s_at  | ARNT     | AF001307  | 405    | Hs.632446            | -1.101517861 | 5.815490939 | 6.9170088   |
| 214600_at    | TEAD1    | AW771935  | 7003   | Hs.655331            | -1.101472135 | 8.981204736 | 10.08267687 |
| 219691_at    | SAMD9    | NM_017654 | 54809  | Hs.65641             | 1.100988335  | 9.303811656 | 8.202823322 |
| 239976_at    | ACAD9    | AW182960  | 28976  | Hs.567482            | 1.100401688  | 6.130208055 | 5.029806367 |
| 1558740_s_at |          | R30807    |        |                      | 1.099601765  | 10.13503402 | 9.035432253 |
| 232601_at    |          | AL353951  |        |                      | -1.099038187 | 6.001987568 | 7.101025755 |

|              |           |           |        |                      |              |             |             |
|--------------|-----------|-----------|--------|----------------------|--------------|-------------|-------------|
| 206073_at    | COLQ      | AF057036  | 8292   | Hs.146735            | 1.098983139  | 6.665248531 | 5.566265392 |
| 1559384_at   |           | BG200365  |        |                      | -1.098477986 | 5.755067174 | 6.85354516  |
| 1560006_a_at | LOC646762 | BG501482  | 646762 | Hs.30579             | -1.098184897 | 6.692340879 | 7.790525776 |
| 211599_x_at  | MET       | U19348    | 4233   | Hs.132966            | -1.09747271  | 5.911399081 | 7.008871792 |
| 207001_x_at  | TSC22D3   | NM_004089 | 1831   | Hs.716410            | -1.09727254  | 6.798348059 | 7.895620599 |
| 213185_at    | KIAA0556  | AI758896  | 23247  | Hs.460459            | 1.09712862   | 8.797165002 | 7.700036382 |
| 205808_at    | ASPH      | NM_004318 | 444    | Hs.591874            | -1.097035487 | 6.875240402 | 7.97227589  |
| 205196_s_at  | AP1S1     | NM_001283 | 1174   | Hs.489365, Hs.718546 | -1.096944635 | 8.853166119 | 9.950110754 |
| 1557300_s_at |           | AI741292  |        |                      | -1.096137097 | 7.990488545 | 9.086625642 |
| 209346_s_at  | PI4K2A    | BC003167  | 55361  | Hs.25300             | -1.095936701 | 7.721884406 | 8.817821107 |
| 206877_at    | MXD1      | NM_002357 | 4084   | Hs.468908            | -1.095496562 | 6.52621936  | 7.621715922 |
| 209385_s_at  | PROSC     | AL136616  | 11212  | Hs.304792, Hs.608177 | -1.095395542 | 8.774954589 | 9.870350131 |
| 216283_s_at  | PVR       | X64116    | 5817   | Hs.171844            | -1.095341598 | 6.431415167 | 7.526756764 |
| 203568_s_at  | TRIM38    | NM_006355 | 10475  | Hs.584851            | -1.095190352 | 6.319049866 | 7.414240218 |
| 236020_s_at  | TRUB1     | BF116232  | 142940 | Hs.21187             | -1.094667823 | 5.277708818 | 6.37237664  |
| 239540_at    |           | AI671903  |        |                      | -1.094514428 | 5.216319062 | 6.31083349  |
| 1559469_s_at | SIPA1L2   | BC006013  | 57568  | Hs.715656            | -1.094254721 | 5.202641387 | 6.296896108 |
| 225009_at    | CMTM4     | AA191708  | 146223 | Hs.643961            | -1.09402093  | 8.467231848 | 9.561252778 |
| 1552760_at   | HDAC9     | BM726008  | 9734   | Hs.196054            | -1.093872787 | 6.317234664 | 7.411107452 |
| 225656_at    | EFHC1     | AI564473  | 114327 | Hs.403171            | -1.093760582 | 6.059782256 | 7.153542838 |
| 222302_at    |           | BE813017  |        |                      | 1.092982428  | 7.306887289 | 6.213904861 |
| 242812_at    | TRIM26    | AW294604  | 7726   | Hs.485041            | -1.092356092 | 7.356160326 | 8.448516418 |
| 222570_at    | FREQ      | AA045247  | 23413  | Hs.642946, Hs.714951 | -1.091906135 | 10.20880628 | 11.30071242 |
| 222562_s_at  | TNKS2     | BF060683  | 80351  | Hs.329327            | -1.091518026 | 7.788561154 | 8.880079181 |
| 226367_at    | KDM5A     | AA854032  | 5927   | Hs.76272             | -1.091349787 | 6.735818546 | 7.827168333 |
| 231167_at    |           | AW444881  |        |                      | -1.090906876 | 7.757589431 | 8.848496307 |
| 232372_at    |           | AL157491  |        |                      | -1.089998143 | 5.282378497 | 6.37237664  |
| 230270_at    | PRPF38B   | N32872    | 55119  | Hs.342307            | -1.089977884 | 7.620990109 | 8.710967993 |
| 211448_s_at  | RGS6      | AF107619  | 9628   | Hs.509872            | 1.089885363  | 6.580525269 | 5.490639907 |
| 235646_at    |           | BF515595  |        |                      | -1.089555623 | 5.703855042 | 6.793410665 |
| 216062_at    |           | AW851559  |        |                      | -1.089213609 | 5.099045441 | 6.18825905  |
| 203795_s_at  | BCL7A     | NM_020993 | 605    | Hs.530970            | -1.088336368 | 7.553463117 | 8.641799485 |
| 1554660_a_at | C1orf71   | BC036200  | 163882 | Hs.368353            | -1.088062932 | 5.819719122 | 6.907782054 |
| 227858_at    | PCNXL3    | AI379451  | 399909 | Hs.380801            | -1.087966143 | 7.649570311 | 8.737536453 |
| 226470_at    | GGT7      | AL049709  | 2686   | Hs.433738            | 1.087219366  | 7.110046694 | 6.022827328 |
| 211944_at    | BAT2D1    | BE729523  | 23215  | Hs.494614            | -1.086679786 | 10.3875885  | 11.47426828 |
| 1554481_a_at | EPB41     | BC039079  | 2035   | Hs.175437, Hs.708933 | -1.0866319   | 7.075120595 | 8.161752495 |
| 1552507_at   | KCNE4     | NM_080671 | 23704  | Hs.348522            | -1.08635189  | 5.526433464 | 6.612785354 |
| 217100_s_at  | UBXN7     | AK026451  | 26043  | Hs.518524            | -1.086265959 | 9.634416352 | 10.72068231 |
| 222062_at    | IL27RA    | AI983115  | 9466   | Hs.132781            | 1.086018546  | 8.974037479 | 7.888018933 |
| 230060_at    | CDCA7     | AI277642  | 83879  | Hs.470654            | -1.085843024 | 6.654688228 | 7.740531252 |
| 1555611_s_at | MBD1      | BC012487  | 4152   | Hs.405610            | -1.085192631 | 5.587055327 | 6.672247958 |
| 221830_at    | RAP2A     | AI302106  | 5911   | Hs.508480            | -1.084421823 | 8.754015385 | 9.838437208 |

|              |              |           |           |                             |              |             |             |
|--------------|--------------|-----------|-----------|-----------------------------|--------------|-------------|-------------|
| 242316_at    |              | AI810103  |           |                             | 1.084372542  | 6.123735231 | 5.039362689 |
| 202838_at    | FUCA1        | NM_000147 | 2517      | Hs.370858                   | 1.084233515  | 9.200550851 | 8.116317336 |
| 207031_at    | NKX3-2       | NM_001189 | 579       | Hs.590927                   | 1.083862365  | 6.175840173 | 5.091977808 |
| 238368_at    |              | AW271932  |           |                             | -1.08320377  | 6.725834848 | 7.809038618 |
| 213774_s_at  | PPP1R2       | AW614578  | 5504      | Hs.535731, Hs.706920        | -1.08261368  | 8.504541768 | 9.587155448 |
| 204117_at    | PREP         | NM_002726 | 5550      | Hs.436564                   | -1.082529057 | 10.08514498 | 11.16767403 |
| 241349_at    |              | BF854663  |           |                             | -1.082477108 | 5.441876712 | 6.52435382  |
| 230779_at    | TNRC6B       | BF594371  | 23112     | Hs.372082                   | -1.082387197 | 9.304877494 | 10.38726469 |
| 223535_at    | NUDT12       | AL136592  | 83594     | Hs.434289                   | 1.082349572  | 8.097196776 | 7.014847204 |
| 1570151_at   |              | BC013779  |           |                             | -1.08220191  | 5.377718211 | 6.45992012  |
| 209446_s_at  | C7orf44      | BC001743  | 55744     | Hs.654779, Hs.655165, Hs.65 | -1.081951542 | 7.858483956 | 8.940435499 |
| 219968_at    | ZNF589       | NM_016089 | 51385     | Hs.172602                   | 1.080991437  | 9.588953173 | 8.507961736 |
| 213319_s_at  | CSDA         | AW170359  | 8531      | Hs.221889                   | -1.080728477 | 8.179641394 | 9.260369872 |
| 240282_at    | WDR1         | AW770902  | 9948      | Hs.128548, Hs.713658        | -1.080540163 | 7.016768021 | 8.097308184 |
| 202834_at    | AGT          | NM_000029 | 183       | Hs.19383                    | -1.079694366 | 6.720121912 | 7.799816278 |
| 237317_at    |              | AW136338  |           |                             | -1.078615002 | 5.85599133  | 6.934606332 |
| 229848_at    | ZNF10        | W72653    | 7556      | Hs.507355                   | 1.078598314  | 7.398229802 | 6.319631489 |
| 1553787_at   | C11orf45     | NM_145013 | 219833    | Hs.351133                   | 1.078585546  | 8.157325662 | 7.078740116 |
| 210654_at    | TNFRSF10D    | AF021233  | 8793      | Hs.213467                   | -1.07836386  | 5.658784859 | 6.737148719 |
| 225116_at    | HIPK2        | AW300045  | 28996     | Hs.397465, Hs.632033        | -1.078133419 | 9.897604855 | 10.97573827 |
| 204732_s_at  | TRIM23       | AI021991  | 373       | Hs.792                      | -1.077968016 | 6.319999233 | 7.397967249 |
| 239219_at    | AURKB        | N55457    | 9212      | Hs.442658                   | -1.077944062 | 5.52262918  | 6.600573242 |
| 225488_at    | DERL1        | AI967978  | 79139     | Hs.241576                   | 1.077087465  | 6.378190947 | 5.301103482 |
| 234153_at    |              | AK024662  |           |                             | -1.076741516 | 6.300984803 | 7.377726318 |
| 213487_at    | MAP2K2       | AI762811  | 5605      | Hs.465627                   | -1.076621629 | 6.544119258 | 7.620740887 |
| 243171_at    | LOC10012832! | AA570178  | 100128325 | Hs.105944                   | 1.076419961  | 6.667086518 | 5.590666558 |
| 225584_at    |              | BE880820  |           |                             | -1.076312974 | 7.858400698 | 8.934713672 |
| 243801_x_at  |              | AA971709  |           |                             | -1.076113137 | 7.289539483 | 8.36565262  |
| 217066_s_at  | DMPK         | M87313    | 1760      | Hs.631596                   | 1.074938994  | 8.599722823 | 7.524783829 |
| 233690_at    |              | AK026743  |           |                             | -1.073998274 | 5.918975238 | 6.992973513 |
| 204188_s_at  | RARG         | M57707    | 5916      | Hs.1497                     | -1.073737084 | 5.405718968 | 6.479456052 |
| 1557889_at   |              | BC006326  |           |                             | -1.073605913 | 5.405712676 | 6.479318589 |
| 231321_s_at  | ACER3        | AI681372  | 55331     | Hs.23862                    | -1.073549842 | 7.79436514  | 8.867914982 |
| 242208_at    | ZNF37B       | AI634543  | 100129482 | Hs.646695, Hs.648656, Hs.65 | -1.072925259 | 6.596324273 | 7.669249532 |
| 232050_at    |              | AU151146  |           |                             | -1.072699422 | 6.446929219 | 7.519628641 |
| 226874_at    | KLHL8        | BF591270  | 57563     | Hs.106601, Hs.715202        | -1.072628777 | 8.467027002 | 9.539655779 |
| 1553107_s_at |              | BF436799  |           |                             | -1.072495703 | 8.282172689 | 9.354668393 |
| 228408_s_at  | SDAD1        | AI738666  | 55153     | Hs.632604                   | -1.072217508 | 10.78306161 | 11.85527912 |
| 239071_at    | RBBP4        | AI972451  | 5928      | Hs.16003                    | -1.071805519 | 6.912580784 | 7.984386303 |
| 1556195_a_at |              | BC033316  |           |                             | 1.0717544    | 7.142754922 | 6.071000522 |
| 228771_at    | ADRBK2       | AI651212  | 157       | Hs.657494                   | 1.07167059   | 8.406347421 | 7.33467683  |
| 214177_s_at  | PBXIP1       | AI935162  | 57326     | Hs.505806                   | 1.071340119  | 8.916915099 | 7.84557498  |
| 1554217_a_at | CCDC132      | BC017888  | 55610     | Hs.222282                   | -1.071196789 | 7.283901918 | 8.355098707 |

|             |          |           |                            |              |             |             |
|-------------|----------|-----------|----------------------------|--------------|-------------|-------------|
| 223194_s_at | SLC22A23 | AL512737  | 63027 Hs.713588            | 1.070578005  | 9.087551558 | 8.016973553 |
| 212576_at   | MGRN1    | AB011116  | 23295 Hs.526494            | -1.070233246 | 9.664276165 | 10.73450941 |
| 1556389_at  | CNPY3    | AF161347  | 10695 Hs.414099            | 1.070161827  | 7.02893795  | 5.958776123 |
| 211786_at   | TNFRSF9  | BC006196  | 3604 Hs.654459             | 1.070099516  | 7.069616146 | 5.999516629 |
| 241788_x_at |          | AW168912  |                            | -1.069587539 | 5.454218627 | 6.523806166 |
| 243456_at   | ZNF214   | AW182291  | 7761 Hs.445849             | 1.069549991  | 7.028055677 | 5.958505685 |
| 215905_s_at | SNRNP40  | AL157420  | 9410 Hs.33962              | -1.069127691 | 10.72708108 | 11.79620877 |
| 224992_s_at | CMIP     | AI363061  | 80790 Hs.709248            | -1.068227552 | 7.39603313  | 8.464260682 |
| 226407_at   |          | BE549656  |                            | -1.067910741 | 8.976841534 | 10.04475227 |
| 208129_x_at | RUNX1    | NM_001754 | 861 Hs.149261, Hs.612648   | 1.067733923  | 6.624561706 | 5.556827782 |
| 237127_at   |          | AA142959  |                            | -1.06749871  | 5.291089937 | 6.358588648 |
| 230140_at   | PTPN9    | AI742739  | 5780 Hs.445775             | -1.067335885 | 5.062247611 | 6.129583496 |
| 201008_s_at | TXNIP    | AA812232  | 10628 Hs.533977, Hs.715525 | -1.067206822 | 11.29366691 | 12.36087374 |
| 226368_at   | CHST11   | AI806905  | 50515 Hs.17569             | -1.067046476 | 8.298538996 | 9.365585472 |
| 37950_at    | PREP     | X74496    | 5550 Hs.436564             | -1.066586826 | 9.766123366 | 10.83271019 |
| 214929_s_at | KIAA1109 | AL137384  | 84162 Hs.408142            | -1.066471848 | 5.73890927  | 6.805381119 |
| 1554844_at  | EYA3     | BC041667  | 2140 Hs.185774             | 1.066452597  | 7.028055677 | 5.96160308  |
| 203181_x_at | SRPK2    | AW149364  | 6733 Hs.285197             | -1.066040752 | 10.12019191 | 11.18623266 |
| 203681_at   | IVD      | M34192    | 3712 Hs.513646             | -1.064515093 | 5.918632894 | 6.983147988 |
| 207824_s_at | MAZ      | NM_002383 | 4150 Hs.23650              | -1.064493312 | 6.336501707 | 7.400995019 |
| 211826_s_at | AFF1     | L22179    | 4299 Hs.480190             | -1.064062243 | 5.544998819 | 6.609061063 |
| 231793_s_at | CAMK2D   | AA448956  | 817 Hs.144114              | -1.063371347 | 5.942160683 | 7.00553203  |
| 213167_s_at |          | BF982927  |                            | -1.063334674 | 5.519838835 | 6.583173509 |
| 238050_at   | ANTXR2   | R94785    | 118429 Hs.162963           | 1.06267109   | 8.141411206 | 7.078740116 |
| 232164_s_at | EPPK1    | AL137725  | 83481 Hs.200412            | 1.06260544   | 6.699463322 | 5.636857882 |
| 226843_s_at | PAPD5    | AU146704  | 64282 Hs.514342            | -1.062541855 | 9.163408416 | 10.22595027 |
| 1555261_at  |          | AL832319  |                            | -1.062358351 | 5.714801036 | 6.777159387 |
| 204147_s_at | TFDP1    | NM_007111 | 7027 Hs.79353              | -1.061964479 | 8.745861079 | 9.807825559 |
| 232122_s_at | VEPH1    | AK022666  | 79674 Hs.658046            | 1.061344099  | 7.224863663 | 6.163519564 |
| 238761_at   |          | BE645241  |                            | -1.061292494 | 7.97493772  | 9.036230213 |
| 230878_s_at | COG1     | BF510252  | 9382 Hs.283109             | -1.06127818  | 5.202641387 | 6.263919567 |
| 243487_at   | AFF4     | AV652437  | 27125 Hs.519313, Hs.664840 | -1.061025187 | 6.957827673 | 8.01885286  |
| 1556049_at  | RTN4     | CA428769  | 57142 Hs.704007            | -1.059980933 | 5.976566318 | 7.036547252 |
| 205195_at   | AP1S1    | NM_001283 | 1174 Hs.489365, Hs.718546  | -1.059717876 | 9.733135342 | 10.79285322 |
| 242071_x_at | ITGA8    | BF446919  | 8516 Hs.171311             | 1.059665285  | 6.507044909 | 5.447379624 |
| 223916_s_at | BCOR     | AF317392  | 54880 Hs.659681            | -1.059346869 | 7.184684891 | 8.24403176  |
| 204633_s_at | RPS6KA5  | AF074393  | 9252 Hs.510225             | -1.058992339 | 6.109167754 | 7.168160093 |
| 215329_s_at |          | AL031282  |                            | -1.058451313 | 7.802749283 | 8.861200596 |
| 222457_s_at | LIMA1    | BC001247  | 51474 Hs.525419            | -1.058363456 | 10.62538219 | 11.68374565 |
| 222055_at   |          | AA723370  |                            | 1.058243213  | 7.383419967 | 6.325176754 |
| 229095_s_at |          | AI797263  |                            | 1.058002316  | 10.1484648  | 9.090462487 |
| 37996_s_at  | DMPK     | L08835    | 1760 Hs.631596             | 1.05799136   | 9.8760688   | 8.81807744  |
| 228528_at   |          | AI927692  |                            | 1.057752648  | 7.215323087 | 6.157570439 |

|              |          |           |        |                             |              |             |             |
|--------------|----------|-----------|--------|-----------------------------|--------------|-------------|-------------|
| 210062_s_at  | ZNF589   | AF114817  | 51385  | Hs.172602                   | 1.057135271  | 9.449690131 | 8.39255486  |
| 228834_at    | TOB1     | BF240286  | 10140  | Hs.709952, Hs.714409, Hs.71 | -1.056984323 | 9.382509464 | 10.43949379 |
| 1565705_x_at |          | AK025048  |        |                             | 1.056618609  | 7.213919758 | 6.157301148 |
| 235266_at    | ATAD2    | AI139629  | 29028  | Hs.370834                   | -1.055921373 | 9.207035822 | 10.2629572  |
| 221011_s_at  | LBH      | NM_030915 | 81606  | Hs.567598, Hs.593113        | -1.055114232 | 8.174725647 | 9.229839879 |
| 217595_at    | GSPT1    | AV701723  | 2935   | Hs.528780                   | -1.054725407 | 5.300802662 | 6.355528069 |
| 236728_at    | LNPEP    | AW070437  | 4012   | Hs.527199, Hs.656905        | 1.054466478  | 6.351262908 | 5.29679643  |
| 232485_at    | RUNDC2A  | AK022425  | 84127  | Hs.458401                   | -1.054429087 | 6.058967424 | 7.113396511 |
| 241457_at    |          | AI821935  |        |                             | -1.053603425 | 5.118904193 | 6.172507618 |
| 243046_at    |          | BF679700  |        |                             | -1.053272274 | 5.697155221 | 6.750427495 |
| 210655_s_at  |          | AF041336  |        |                             | -1.053126481 | 7.877550724 | 8.930677205 |
| 215501_s_at  | DUSP10   | AK022513  | 11221  | Hs.497822                   | -1.052896056 | 9.282712106 | 10.33560816 |
| 201635_s_at  | FXR1     | AI990766  | 8087   | Hs.478407                   | -1.052784195 | 9.167273083 | 10.22005728 |
| 242767_at    | LMCD1    | N95437    | 29995  | Hs.475353                   | 1.052748263  | 7.462712303 | 6.409964041 |
| 223661_at    | NUCKS1   | AF130080  | 64710  | Hs.213061, Hs.652429        | -1.052375643 | 10.29348244 | 11.34585808 |
| 232527_at    |          | AU146179  |        |                             | -1.052185969 | 5.660661583 | 6.712847552 |
| 206532_at    | SMARCB1  | NM_003073 | 6598   | Hs.534350                   | -1.051820061 | 8.406140212 | 9.457960274 |
| 204666_s_at  | SIKE1    | NM_025073 | 80143  | Hs.709277                   | -1.051659831 | 7.094765642 | 8.146425473 |
| 205872_x_at  | PDE4DIP  | NM_022359 | 9659   | Hs.584841, Hs.613082, Hs.65 | -1.051461499 | 7.635514068 | 8.686975567 |
| 235551_at    | WDR4     | AA555280  | 10785  | Hs.248815                   | -1.051010507 | 6.239048831 | 7.290059338 |
| 1557073_s_at | TTBK2    | AK074481  | 146057 | Hs.659846, Hs.713940        | -1.05071238  | 6.869075213 | 7.919787593 |
| 221553_at    | MAGT1    | AL136636  | 84061  | Hs.323562, Hs.710189        | -1.049823574 | 7.778110253 | 8.827933826 |
| 230803_s_at  | ARHGAP24 | AI761947  | 83478  | Hs.444229                   | -1.049463602 | 6.924717409 | 7.974181012 |
| 224760_at    | SP1      | AI795991  | 6667   | Hs.620754, Hs.649191        | -1.049414317 | 8.967103649 | 10.01651797 |
| 223557_s_at  | TMEFF2   | AB017269  | 23671  | Hs.144513                   | 1.048889773  | 9.10790761  | 8.059017837 |
| 1555122_at   | GPR125   | BC026009  | 166647 | Hs.99195                    | -1.048704528 | 6.056658512 | 7.105363039 |
| 219969_at    | CXorf15  | NM_018360 | 55787  | Hs.555961                   | -1.048336574 | 9.257380037 | 10.30571661 |
| 207524_at    | ST7      | NM_021908 | 7982   | Hs.368131                   | 1.048158008  | 9.169947905 | 8.121789897 |
| 210994_x_at  | TRIM23   | AF230398  | 373    | Hs.792                      | -1.047689439 | 7.487058776 | 8.534748214 |
| 220656_at    | NARG1L   | NM_018527 | 79612  | Hs.512914                   | -1.047232178 | 5.801969658 | 6.849201836 |
| 203788_s_at  | SEMA3C   | AI962897  | 10512  | Hs.269109                   | -1.047147016 | 7.657379884 | 8.7045269   |
| 225524_at    | ANTXR2   | AU152178  | 118429 | Hs.162963                   | 1.047116403  | 12.70710391 | 11.6599875  |
| 223946_at    | MED23    | AL136776  | 9439   | Hs.29679                    | 1.045968538  | 7.348054343 | 6.302085805 |
| 237315_at    |          | AI683864  |        |                             | 1.045620835  | 6.251350246 | 5.20572941  |
| 212520_s_at  | SMARCA4  | AI684141  | 6597   | Hs.327527                   | -1.04561096  | 9.339880148 | 10.38549111 |
| 216320_x_at  | MST1     | U37055    | 4485   | Hs.349110, Hs.512587        | 1.045600397  | 8.556190394 | 7.510589997 |
| 209713_s_at  | SLC35D1  | AB044343  | 23169  | Hs.213642                   | 1.045202119  | 7.709739228 | 6.664537109 |
| 201914_s_at  | SEC63    | AK001465  | 11231  | Hs.26904                    | -1.044945692 | 10.61824795 | 11.66319364 |
| 238651_at    |          | BF512491  |        |                             | -1.044841803 | 7.122323859 | 8.167165662 |
| 229984_at    | DTWD1    | AI971519  | 56986  | Hs.127432                   | -1.044740489 | 6.153169784 | 7.197910273 |
| 231419_at    |          | AI028737  |        |                             | 1.04454399   | 8.540439863 | 7.495895873 |
| 229998_x_at  | FAM176B  | AI304355  | 55194  | Hs.87016                    | 1.044491723  | 6.080496408 | 5.036004684 |
| 206082_at    | HCP5     | NM_006674 | 10866  | Hs.654480                   | 1.043990739  | 6.546590126 | 5.502599387 |

|              |           |           |           |                      |              |             |             |
|--------------|-----------|-----------|-----------|----------------------|--------------|-------------|-------------|
| 215068_s_at  | FBXL18    | BC004228  | 80028     | Hs.623974, Hs.706587 | -1.043808988 | 7.276952433 | 8.320761421 |
| 215869_at    |           | AK022254  |           |                      | 1.043746451  | 6.232288353 | 5.188541902 |
| 202308_at    | SREBF1    | NM_004176 | 6720      | Hs.592123            | 1.043737149  | 8.163653078 | 7.119915929 |
| 220918_at    | C21orf96  | NM_025143 | 80215     | Hs.672131            | -1.04360599  | 5.656815631 | 6.700421621 |
| 222054_at    | LOC728448 | BF511556  | 728448    | Hs.472508, Hs.710761 | 1.043070234  | 8.216625202 | 7.173554968 |
| 225968_at    | PRICKLE2  | BG285881  | 166336    | Hs.699317            | 1.041651065  | 9.559516796 | 8.517865731 |
| 209889_at    | SEC31B    | AF274863  | 25956     | Hs.18889             | 1.041603408  | 8.591873923 | 7.550270514 |
| 222687_s_at  | ACER3     | R12678    | 55331     | Hs.23862             | -1.041362666 | 8.71991833  | 9.761280996 |
| 204036_at    | LPAR1     | AW269335  | 1902      | Hs.126667            | 1.041033762  | 10.49753274 | 9.456498977 |
| 225137_at    |           | BF111111  |           |                      | -1.040952968 | 8.058552695 | 9.099505663 |
| 211165_x_at  | EPHB2     | D31661    | 2048      | Hs.523329            | -1.040896985 | 6.63645036  | 7.677347345 |
| 1566171_at   | RFFL      | AK092922  | 117584    | Hs.13680             | -1.040259104 | 4.992639579 | 6.032898684 |
| 1557409_at   |           | CA313226  |           |                      | -1.040191257 | 5.951257438 | 6.991448695 |
| 201747_s_at  | SAFB      | AI769566  | 6294      | Hs.23978             | -1.039898767 | 7.928334704 | 8.968233471 |
| 201043_s_at  | ANP32A    | NM_006305 | 8125      | Hs.458747            | -1.039744746 | 11.12745747 | 12.16720222 |
| 210671_x_at  | MAPK8     | U35004    | 5599      | Hs.138211            | -1.039719263 | 5.797106482 | 6.836825745 |
| 201593_s_at  | ZC3H15    | AV716798  | 55854     | Hs.368598            | -1.039599765 | 11.12550419 | 12.16510395 |
| 201775_s_at  | KIAA0494  | AA676790  | 9813      | Hs.719205            | -1.039544381 | 8.932408805 | 9.971953187 |
| 206569_at    | IL24      | NM_006850 | 11009     | Hs.58831, Hs.719320  | 1.03937498   | 8.295341521 | 7.255966541 |
| 1554825_at   |           | BC033184  |           |                      | -1.039310488 | 7.481515983 | 8.52082647  |
| 240247_at    |           | AI653240  |           |                      | -1.038345411 | 7.335617501 | 8.373962912 |
| 208583_x_at  | HIST1H2AJ | NM_021066 | 8331      | Hs.406691            | -1.038120389 | 6.980584878 | 8.018705267 |
| 244695_at    | GHRLOS    | AW138672  | 100126793 | Hs.166924, Hs.698339 | -1.037675082 | 6.046640686 | 7.084315768 |
| 219864_s_at  | RCAN3     | NM_013441 | 11123     | Hs.656799            | -1.036544327 | 6.37161451  | 7.408158837 |
| 211899_s_at  | TRAF4     | AF082185  | 9618      | Hs.8375              | -1.036527148 | 5.931034484 | 6.967561632 |
| 233152_x_at  |           | AL049979  |           |                      | -1.03650833  | 5.921354698 | 6.957863028 |
| 244637_at    |           | AA302745  |           |                      | -1.03641262  | 5.303098558 | 6.339511177 |
| 226576_at    | ARHGAP26  | AI768563  | 23092     | Hs.654668            | 1.036382767  | 7.126818558 | 6.090435791 |
| 204786_s_at  | IFNAR2    | L41944    | 3455      | Hs.708195            | -1.036322795 | 8.485587739 | 9.521910535 |
| 223185_s_at  | BHLHE41   | AI819798  | 79365     | Hs.177841            | -1.035969846 | 5.177394715 | 6.21336456  |
| 1558373_s_at |           | T10213    |           |                      | -1.035952634 | 5.865077631 | 6.901030265 |
| 209770_at    | BTN3A1    | U90552    | 11119     | Hs.191510, Hs.628564 | 1.035869413  | 8.646877952 | 7.61100854  |
| 209579_s_at  | MBD4      | AL556619  | 8930      | Hs.35947             | -1.035775867 | 10.45661212 | 11.49238799 |
| 235417_at    | SPOCD1    | BF689253  | 90853     | Hs.62604             | 1.035752827  | 9.448316376 | 8.412563549 |
| 206675_s_at  | SKIL      | NM_005414 | 6498      | Hs.581632            | -1.03567056  | 7.448372802 | 8.484043362 |
| 1555358_a_at | ENTPD4    | BC034477  | 9583      | Hs.444389            | -1.035552912 | 4.998977794 | 6.034530705 |
| 204285_s_at  | PMAIP1    | AI857639  | 5366      | Hs.96                | -1.03549384  | 9.410464042 | 10.44595788 |
| 238594_x_at  | DUSP8     | AI864441  | 1850      | Hs.41688             | 1.035444698  | 7.370778511 | 6.335333813 |
| 220337_at    | NGB       | NM_021257 | 58157     | Hs.274363            | 1.035185001  | 6.370905039 | 5.335720038 |
| 1559307_s_at | RBL1      | BG387892  | 5933      | Hs.207745            | -1.034501622 | 5.003860992 | 6.038362614 |
| 241898_at    |           | AA991267  |           |                      | 1.034367527  | 7.715293559 | 6.680926033 |
| 223788_at    |           | AF116627  |           |                      | 1.034231491  | 6.501282045 | 5.467050554 |
| 1559051_s_at | C6orf150  | AK097148  | 115004    | Hs.658405            | -1.033789965 | 6.318005066 | 7.351795031 |

|              |          |           |        |                      |              |             |             |
|--------------|----------|-----------|--------|----------------------|--------------|-------------|-------------|
| 229584_at    | LRRK2    | AK026776  | 120892 | Hs.187636            | 1.033169168  | 8.580751333 | 7.547582165 |
| 222880_at    | AKT3     | AF135794  | 10000  | Hs.498292            | -2.032246946 | 5.55852434  | 8.590771286 |
| 226568_at    | FAM102B  | AI478747  | 284611 | Hs.200230            | -1.03222448  | 8.758823513 | 9.791047994 |
| 220243_at    | ZBTB44   | NM_014155 | 29068  | Hs.719099            | -1.032091225 | 4.981447979 | 6.013539204 |
| 244208_at    |          | T80844    |        |                      | -1.031460996 | 5.530385881 | 6.561846877 |
| 231577_s_at  | GBP1     | AW014593  | 2633   | Hs.62661             | -1.03145909  | 7.824408971 | 8.855868062 |
| 218821_at    | NPEPL1   | AL139349  | 79716  | Hs.554211, Hs.654868 | 1.031291474  | 8.605529669 | 7.574238195 |
| 214798_at    | ATP2C2   | AW291664  | 9914   | Hs.6168              | 1.030939934  | 7.137012038 | 6.106072104 |
| 215064_at    | SC5DL    | AK027246  | 6309   | Hs.287749            | -1.030068697 | 6.72034743  | 7.750416127 |
| 232000_at    | TTC39B   | AW001030  | 158219 | Hs.563630            | 1.029981938  | 6.177371739 | 5.147389802 |
| 243446_at    | JUB      | BE466527  | 84962  | Hs.655832            | 1.029362329  | 6.237751789 | 5.20838946  |
| 231761_at    | FFAR1    | NM_005303 | 2864   | Hs.248127            | 1.029165098  | 6.55886517  | 5.529700072 |
| 207453_s_at  | DNAJB5   | NM_012266 | 25822  | Hs.237506            | -1.028736014 | 5.269362966 | 6.29809898  |
| 226079_at    | FLYWCH2  | AL542248  | 114984 | Hs.534525            | -1.028670308 | 7.259712027 | 8.288382336 |
| 228298_at    | FAM113B  | BF056901  | 91523  | Hs.560100            | 1.028318751  | 6.982894058 | 5.954575307 |
| 231343_at    |          | AW300131  |        |                      | 1.027705072  | 8.683333732 | 7.655628661 |
| 232207_at    | GUSBL2   | AK026691  | 375513 | Hs.561539, Hs.711053 | 1.027641533  | 6.254540162 | 5.226898629 |
| 236505_at    | NUP62    | AI807145  | 23636  | Hs.574492            | -1.027636213 | 5.278251725 | 6.305887937 |
| 209223_at    |          | BF434335  |        |                      | -1.02762827  | 5.26211968  | 6.28974795  |
| 204630_s_at  | GOSR1    | NM_004871 | 9527   | Hs.462680            | -1.027613935 | 9.748774631 | 10.77638857 |
| 1570177_at   |          | BC026287  |        |                      | -1.027409786 | 5.687021764 | 6.714431551 |
| 208930_s_at  | ILF3     | BG032366  | 3609   | Hs.465885            | -1.026860908 | 10.65653009 | 11.683391   |
| 232035_at    | HIST1H4B | BE740761  | 8366   | Hs.143080            | -1.026736376 | 6.712140035 | 7.738876411 |
| 229921_at    |          | BF196255  |        |                      | 1.026429107  | 7.511140563 | 6.484711455 |
| 242558_at    |          | AW362945  |        |                      | -1.025306555 | 6.662712125 | 7.68801868  |
| 205210_at    | TGFBRAP1 | NM_004257 | 9392   | Hs.446350            | -1.025295507 | 7.30635727  | 8.331652778 |
| 1554417_s_at | APH1A    | AY113699  | 51107  | Hs.108408            | -1.025206147 | 7.535066033 | 8.560272181 |
| 235435_at    | AASDH    | BF433048  | 132949 | Hs.104347            | -1.024868816 | 8.922872388 | 9.947741205 |
| 235067_at    | MKLN1    | D81987    | 4289   | Hs.44693             | -1.024627457 | 7.481443818 | 8.506071275 |
| 238405_at    |          | AI792896  |        |                      | 1.024486493  | 6.371306943 | 5.34682045  |
| 219992_at    | TAC3     | NM_013251 | 6866   | Hs.9730              | 1.024285157  | 6.251350246 | 5.227065089 |
| 232781_at    |          | AA708488  |        |                      | -1.023990964 | 5.78003611  | 6.804027074 |
| 205594_at    | ZNF652   | NM_014897 | 22834  | Hs.463375            | -1.023713275 | 6.406000633 | 7.429713908 |
| 243603_at    |          | AI973041  |        |                      | 1.023660919  | 7.645802808 | 6.62214189  |
| 239757_at    | ZFAND6   | AA741493  | 54469  | Hs.719106            | -1.023611402 | 6.163908933 | 7.187520335 |
| 212151_at    | PBX1     | BF967998  | 5087   | Hs.557097            | -1.022862791 | 8.235255071 | 9.258117862 |
| 206997_s_at  | HS6ST1   | NM_004807 | 9394   | Hs.512841            | 1.022862765  | 6.004385685 | 4.981522919 |
| 232865_at    | AFF4     | N59653    | 27125  | Hs.519313, Hs.664840 | -1.022589455 | 5.452597077 | 6.475186532 |
| 232125_at    |          | AU147419  |        |                      | -1.022559928 | 7.994139929 | 9.016699857 |
| 218496_at    | RNASEH1  | BG534527  | 246243 | Hs.568006            | -1.022493594 | 9.394744704 | 10.4172383  |
| 201182_s_at  | CHD4     | AI761771  | 1108   | Hs.162233            | -1.022110436 | 8.761544903 | 9.783655339 |
| 216990_at    | GART     | AF008655  | 2618   | Hs.473648            | -1.021960513 | 6.996008643 | 8.017969156 |
| 213345_at    | NFATC4   | AI624015  | 4776   | Hs.77810             | 1.021436881  | 6.221839177 | 5.200402296 |

|              |           |                |        |                             |              |             |             |
|--------------|-----------|----------------|--------|-----------------------------|--------------|-------------|-------------|
| 218430_s_at  | RFX7      | NM_022841      | 64864  | Hs.282855                   | -1.021378262 | 7.55681616  | 8.578194421 |
| 223159_s_at  | NEK6      | BC000101       | 10783  | Hs.197071                   | 1.021105326  | 10.80440294 | 9.783297609 |
| 201702_s_at  | PPP1R10   | AI492873       | 5514   | Hs.106019                   | -1.021005666 | 10.6734518  | 11.69445747 |
| 223476_s_at  | C12orf65  | AW007238       | 91574  | Hs.319128                   | -1.020971891 | 8.86684118  | 9.88781307  |
| 229824_at    |           | AL133706       |        |                             | 1.020627076  | 7.780355205 | 6.759728129 |
| 242916_at    | CEP110    | AA642477       | 11064  | Hs.653263                   | -1.020528607 | 7.193160223 | 8.21368883  |
| 227259_at    | CD47      | BF439618       | 961    | Hs.446414                   | -1.020338999 | 5.935928755 | 6.956267754 |
| 230980_x_at  |           | AI307713       |        |                             | 1.020326312  | 6.021736543 | 5.001410231 |
| 231710_at    | CAPS      | AI923108       | 828    | Hs.584744                   | 1.019966435  | 7.031551271 | 6.011584836 |
| 243834_at    | TNRC6A    | BF507964       | 27327  | Hs.655057                   | -1.019869219 | 7.680039557 | 8.699908776 |
| 237986_at    |           | AI076355       |        |                             | 1.019835089  | 6.15864829  | 5.138813201 |
| 202616_s_at  | MECP2     | AI631140       | 4204   | Hs.200716                   | -1.019354649 | 7.399571655 | 8.418926304 |
| 214951_at    | SLC26A10  | AL050358       | 65012  | Hs.159481                   | 1.019262935  | 6.512613691 | 5.493350756 |
| 212341_at    | YIPF6     | AA195936       | 286451 | Hs.700646, Hs.82719         | -1.01905732  | 9.182096186 | 10.20115351 |
| 1568879_a_at | LAMA3     | BC033663       | 3909   | Hs.436367                   | 1.018992587  | 7.46085278  | 6.441860193 |
| 211844_s_at  | NRP2      | AF022859       | 8828   | Hs.471200                   | -1.018927498 | 5.03669572  | 6.055623218 |
| 230232_at    | KIAA0746  | AW340510       | 23231  | Hs.479384                   | -1.01842615  | 5.191786416 | 6.210212567 |
| 226543_at    | MUTED     | AI768114       | 63915  | Hs.719272                   | -1.018307609 | 7.077226584 | 8.095534193 |
| 225565_at    | CREB1     | AA769455       | 1385   | Hs.516646                   | -1.01819817  | 7.622837592 | 8.641035762 |
| 201211_s_at  | DDX3X     | AF061337       | 1654   | Hs.719127                   | -1.017897183 | 9.186105794 | 10.20400298 |
| 228830_s_at  | ATF7      | AI279868       | 11016  | Hs.12286                    | -1.017895218 | 6.374619252 | 7.392514471 |
| 229430_at    |           | AI421311       |        |                             | 1.017644694  | 6.715875591 | 5.698230897 |
| 228375_at    | IGSF11    | BE221674       | 152404 | Hs.112873                   | -1.016430113 | 5.180040149 | 6.196470262 |
| 213109_at    | TNIK      | N25621         | 23043  | Hs.34024                    | -1.016380255 | 5.619899754 | 6.636280009 |
| 1569061_at   | IQGAP3    | BC033549       | 128239 | Hs.591495                   | 1.01620259   | 6.167510943 | 5.151308353 |
| 1554864_a_at | SDC3      | AF248634       | 9672   | Hs.158287                   | -1.015993128 | 5.208556986 | 6.224550113 |
| 240230_s_at  | LOC642826 | AW000942       | 642826 | Hs.463017, Hs.647204, Hs.71 | -1.015965488 | 5.968574787 | 6.984540275 |
| 213823_at    | HOXA11    | H94842         | 3207   | Hs.249171                   | 1.015934847  | 6.414859641 | 5.398924794 |
| 214434_at    | HSPA12A   | AB007877       | 259217 | Hs.654682                   | 1.015821645  | 9.692057854 | 8.67623621  |
| 242405_at    |           | BF358386       |        |                             | -1.01578618  | 5.929049972 | 6.944836152 |
| 224046_s_at  | PDE7A     | U67932         | 5150   | Hs.527119                   | -1.01575698  | 6.428143986 | 7.443900966 |
| 244790_at    | MTCP1     | AA744518       | 4515   | Hs.6917                     | 1.014897546  | 6.779765285 | 5.764867739 |
| 239451_at    |           | AI684643       |        |                             | -1.014350469 | 5.644148481 | 6.65849895  |
| 220941_s_at  | C21orf91  | NM_017447      | 54149  | Hs.293811                   | 1.014298256  | 10.18404739 | 9.16974913  |
| 219507_at    | RSRC1     | NM_016625      | 51319  | Hs.591283                   | -1.014110424 | 9.830114305 | 10.84422473 |
| 208545_x_at  | TAF4      | NM_003185      | 6874   | Hs.18857                    | -1.01362444  | 5.509942324 | 6.523566764 |
| 239635_at    |           | BF510708       |        |                             | -1.013568256 | 7.033255087 | 8.046823344 |
| 213805_at    | ABHD5     | AI692428       | 51099  | Hs.19385                    | -1.013373926 | 8.095431179 | 9.108805105 |
| 228054_at    | TMEM44    | BF593660       | 93109  | Hs.478729                   | 1.013296068  | 10.12899998 | 9.115703916 |
| 236474_at    |           | AI797677       |        |                             | -1.012768683 | 5.403761619 | 6.416530303 |
| 206723_s_at  | LPAR2     | AF011466       | 9170   | Hs.122575                   | 1.012606327  | 7.275394456 | 6.262788129 |
| 1554452_a_at | C7orf68   | BC001863       | 29923  | Hs.710088                   | -1.012290578 | 7.714002175 | 8.726292753 |
| 232637_at    |           | 2-Sep AK025163 | 4735   | Hs.335057, Hs.716403        | -1.012210597 | 5.015339604 | 6.0275502   |



|              |          |           |        |                      |              |             |             |
|--------------|----------|-----------|--------|----------------------|--------------|-------------|-------------|
| 220583_at    |          | NM_025086 |        |                      | 1.012201775  | 6.026901621 | 5.014699846 |
| 219183_s_at  | CYTH4    | NM_013385 | 27128  | Hs.170944            | 1.01209571   | 6.666234547 | 5.654138837 |
| 236328_at    | ZNF285A  | AW513227  | 26974  | Hs.709428            | 1.011830667  | 8.51443873  | 7.502608062 |
| 236229_at    |          | AW014345  |        |                      | -1.011639565 | 6.837801263 | 7.849440827 |
| 238299_at    |          | AW005866  |        |                      | -1.011605433 | 5.69221533  | 6.703820763 |
| 228263_at    | GRASP    | AI190755  | 160622 | Hs.407202            | 1.011518571  | 7.384380724 | 6.372862153 |
| 213865_at    | DCBLD2   | AI378788  | 131566 | Hs.203691            | -1.010882735 | 9.532967741 | 10.54385048 |
| 243286_at    |          | AA682674  |        |                      | -1.010461201 | 6.665000057 | 7.675461258 |
| 236172_at    | LTB4R    | AW206817  | 1241   | Hs.567248            | 1.010222971  | 7.541767062 | 6.531544091 |
| 210990_s_at  | LAMA4    | U77706    | 3910   | Hs.654572            | 1.010125693  | 6.271394397 | 5.261268704 |
| 210359_at    | MTSS1    | AF116674  | 9788   | Hs.336994, Hs.700429 | -1.009633309 | 5.384359866 | 6.393993175 |
| 40562_at     | GNA11    | AF011499  | 2767   | Hs.650575, Hs.654784 | -1.009517305 | 7.3260653   | 8.335582606 |
| 239759_at    |          | AV648418  |        |                      | -1.009044807 | 5.216420156 | 6.225464963 |
| 229387_at    | LRCH3    | BF514834  | 84859  | Hs.518414, Hs.659335 | -1.008952963 | 6.314597975 | 7.323550938 |
| 222463_s_at  | BACE1    | AF190725  | 23621  | Hs.504003            | -1.008705763 | 7.00403905  | 8.012744812 |
| 235727_at    | KLHL28   | AI219490  | 54813  | Hs.653206            | -1.008557742 | 8.240173089 | 9.248730831 |
| 204181_s_at  | ZBTB43   | T90308    | 23099  | Hs.355581, Hs.718657 | -1.00828226  | 9.754812538 | 10.7630948  |
| 238882_at    |          | BF000697  |        |                      | -1.008099218 | 6.137764513 | 7.145863731 |
| 1563796_s_at | EARS2    | AK095998  | 124454 | Hs.620541            | 1.007842279  | 8.680204488 | 7.672362209 |
| 221528_s_at  | ELMO2    | BC000143  | 63916  | Hs.210469            | 1.007837175  | 10.0433166  | 9.03547942  |
| 209162_s_at  | PRPF4    | U82756    | 9128   | Hs.530284            | -1.007751293 | 9.654569761 | 10.66232105 |
| 227748_at    | CCBL2    | AI971694  | 56267  | Hs.481898            | -1.007265375 | 8.727966525 | 9.7352319   |
| 226109_at    | C21orf91 | AK023825  | 54149  | Hs.293811            | 1.007262685  | 10.68377173 | 9.676509048 |
| 230885_at    | SPG7     | BE670386  | 6687   | Hs.185597            | -1.007067449 | 7.394027769 | 8.401095219 |
| 210935_s_at  | WDR1     | AF274954  | 9948   | Hs.128548, Hs.713658 | -1.006708698 | 6.928176039 | 7.934884737 |
| 241941_at    |          | AA778747  |        |                      | 1.006167297  | 7.286921911 | 6.280754614 |
| 233230_s_at  | SLAIN2   | AV723459  | 57606  | Hs.479677            | -1.005978408 | 5.342916138 | 6.348894546 |
| 203699_s_at  | DIO2     | U53506    | 1734   | Hs.202354            | -1.005729753 | 5.980203053 | 6.985932806 |
| 239672_at    |          | AW960100  |        |                      | -1.005536728 | 8.129773367 | 9.135310095 |
| 212009_s_at  | STIP1    | AL553320  | 10963  | Hs.337295            | -1.005245097 | 11.14339185 | 12.14863695 |
| 211360_s_at  | ITPR2    | AB012610  | 3709   | Hs.512235            | -1.005151144 | 5.395225213 | 6.400376356 |
| 242276_at    |          | T78081    |        |                      | -1.005066252 | 6.406286226 | 7.411352479 |
| 1562925_at   |          | BC012753  |        |                      | -1.004946914 | 5.405317975 | 6.410264889 |
| 223795_at    | TSPAN10  | AF325213  | 83882  | Hs.208219            | 1.004766023  | 6.085954481 | 5.081188458 |
| 1556434_at   |          | BQ777552  |        |                      | -1.004469536 | 7.324179564 | 8.328649101 |
| 239193_at    | FUBP3    | BF060981  | 8939   | Hs.673029, Hs.98751  | -1.003970812 | 5.43756036  | 6.441531172 |
| 1560017_at   | TMTC3    | AK074973  | 160418 | Hs.331268            | -1.003877522 | 9.527462993 | 10.53134051 |
| 233022_at    | TRPM3    | AF325212  | 80036  | Hs.47288             | 1.003450174  | 6.861526528 | 5.858076354 |
| 243154_at    |          | AA215381  |        |                      | 1.002883862  | 7.667083068 | 6.664199206 |
| 220165_at    | INO80D   | NM_017759 | 54891  | Hs.445036            | -1.00269869  | 5.956439789 | 6.959138479 |
| 214628_at    | NHLH1    | M96739    | 4807   | Hs.30956             | 1.002289454  | 7.928845261 | 6.926555806 |
| 219476_at    | C1orf116 | NM_024115 | 79098  | Hs.32417             | 1.001508254  | 6.347075652 | 5.345567398 |
| 205731_s_at  | NCOA2    | AW027474  | 10499  | Hs.446678            | -1.001195678 | 5.323981076 | 6.325176754 |

|              |          |          |                 |              |             |             |
|--------------|----------|----------|-----------------|--------------|-------------|-------------|
| 232300_at    |          | AL157440 |                 | 1.001180007  | 7.544291683 | 6.543111676 |
| 228152_s_at  | DDX60L   | AK023743 | 91351 Hs.535011 | 1.00101736   | 9.709025442 | 8.708008083 |
| 232396_at    |          | AV711227 |                 | -1.000976761 | 6.125312722 | 7.126289484 |
| 234156_at    |          | AK026905 |                 | 1.000109877  | 8.055355871 | 7.055245993 |
| 1561908_a_at | HS3ST3B1 | AL832823 | 9953 Hs.48384   | -1.000093282 | 5.725954384 | 6.726047666 |
