# Supplementary material for: MicroRNA93 Regulates Proliferation and Differentiation of Normal and Malignant Breast Stem Cells
Source: PubMed Central journal article supplement (PMC3369932; doi:10.1371/journal.pgen.1002751), 2012-06-07
Supplement: pgen.1002751.s028.pdf [file pgen.1002751.s028.pdf]

**Downregulated probe set in ALDH- DOX vs. CTRL**

| Probe        | Symbol       | GenBank   | Gene   | UniGene   | Fold Change  | DOX ALDH-   |
|--------------|--------------|-----------|--------|-----------|--------------|-------------|
| 204114_at    | NID2         | NM_007361 | 22795  | Hs.369840 | 4.010527511  | 9.977249254 |
| 230036_at    | SAMD9L       | BE669858  | 219285 | Hs.489118 | 2.43456334   | 9.01219676  |
| 231644_at    |              | AW016812  |        |           | -2.28442119  | 3.760793278 |
| 226603_at    | SAMD9L       | BE966604  | 219285 | Hs.489118 | 2.253728547  | 8.839771326 |
| 242477_at    | TTC39B       | BF056282  | 158219 | Hs.563630 | 2.242497192  | 7.368197941 |
| 1559722_at   |              | BC042892  |        |           | -2.221829239 | 5.229921317 |
| 217332_at    | RP11-159J2.1 | AL133018  | 647288 | Hs.567920 | 2.174029493  | 6.139308902 |
| 235643_at    | SAMD9L       | BE886225  | 219285 | Hs.489118 | 2.135736034  | 8.625327442 |
| 211548_s_at  | HPGD         | J05594    | 3248   | Hs.596913 | 2.12649599   | 9.413755752 |
| 244610_x_at  |              | AA572726  |        |           | -2.115147586 | 4.848868296 |
| 230607_at    |              | T86874    |        |           | -2.099198155 | 5.01923339  |
| 236826_at    | TTC39B       | H83092    | 158219 | Hs.563630 | 2.095892213  | 6.064166248 |
| 1565701_at   |              | AL832624  |        |           | -2.046879451 | 4.971579139 |
| 230332_at    | ZCCHC7       | AA872187  | 84186  | Hs.654700 | -2.043889025 | 5.360124356 |
| 215206_at    |              | AK025143  |        |           | -2.017442549 | 5.214683376 |
| 214295_at    | KIAA0485     | AW129056  | 57235  | Hs.604754 | -1.990997056 | 5.707951367 |
| 1556865_at   |              | AF143885  |        |           | -1.984807195 | 5.805319923 |
| 233401_at    |              | BF723605  |        |           | -1.967534559 | 4.463644502 |
| 228367_at    | ALPK2        | BE551416  | 115701 | Hs.628152 | 1.963883128  | 8.521473284 |
| 232565_at    |              | AK025052  |        |           | -1.9460451   | 5.904248272 |
| 232882_at    |              | AA079839  |        |           | -1.940352935 | 5.955747586 |
| 238558_at    |              | AI445833  |        |           | -1.931886747 | 6.998535735 |
| 1553155_x_at | ATP6V0D2     | NM_152565 | 245972 | Hs.436360 | 1.921061049  | 8.695275418 |
| 230850_at    |              | AI652647  |        |           | -1.919355579 | 4.681656603 |
| 232333_at    |              | AU147805  |        |           | -1.918927244 | 5.337175905 |
| 215898_at    | TTL5         | AK021879  | 23093  | Hs.709609 | -1.916386887 | 4.618970142 |
| 235705_at    |              | BF676361  |        |           | -1.87895106  | 7.100564992 |
| 239946_at    |              | AA776723  |        |           | -1.87398213  | 5.530788182 |
| 203914_x_at  | HPGD         | NM_000860 | 3248   | Hs.596913 | 1.847250176  | 9.124719435 |
| 1556352_at   |              | AI692624  |        |           | -1.842119819 | 5.638534852 |
| 243993_at    |              | AA436887  |        |           | -1.840232533 | 4.852075649 |
| 242188_at    |              | AI743332  |        |           | -1.837797297 | 4.794329111 |
| 242471_at    |              | AI916641  |        |           | -1.827734629 | 5.6611017   |
| 1569727_at   |              | BC028245  |        |           | 1.81512361   | 7.18984308  |
| 241960_at    | CSMD1        | AA705177  | 64478  | Hs.571466 | 1.807335235  | 7.526109148 |
| 216628_at    |              | AL117447  |        |           | -1.806715435 | 4.570919    |
| 215889_at    | SKIL         | X15217    | 6498   | Hs.581632 | -1.792590443 | 4.300606165 |
| 243874_at    | LPP          | AI079544  | 4026   | Hs.444362 | -1.7892799   | 5.953401452 |
| 244414_at    |              | AI148006  |        |           | -1.784667992 | 5.612596379 |
| 232264_at    |              | AK022204  |        |           | -1.781948978 | 7.101680259 |
| 1553153_at   | ATP6V0D2     | NM_152565 | 245972 | Hs.436360 | 1.781658898  | 8.643414057 |
| 235811_at    |              | AW590853  |        |           | -1.761472083 | 5.217772631 |
| 241391_at    |              | AA654772  |        |           | -1.751722268 | 4.495276984 |
| 236987_at    | ALPK2        | AI741514  | 115701 | Hs.628152 | 1.75078243   | 7.744788588 |
| 1564378_a_at |              | AK025101  |        |           | -1.73803763  | 5.390712969 |
| 239965_at    | LOC151878    | AW009761  | 151878 | Hs.680377 | -1.733473828 | 5.863726509 |
| 1559723_s_at |              | BC042892  |        |           | -1.730407817 | 4.740115765 |
| 241245_at    | SFRS4        | AV647470  | 6429   | Hs.469970 | -1.7243532   | 5.909951144 |

|              |          |           |                        |              |             |
|--------------|----------|-----------|------------------------|--------------|-------------|
| 1562330_s_at | CSMD1    | AB067477  | 64478 Hs.571466        | 1.722298982  | 7.416253855 |
| 236010_at    |          | AI373107  |                        | -1.716358291 | 4.38815632  |
| 224235_at    |          | AF119853  |                        | -1.707169413 | 5.131655531 |
| 236134_at    | DCAF7    | AA769995  | 10238 Hs.410596        | -1.705251892 | 5.144583198 |
| 243271_at    |          | AI064690  |                        | 1.69933647   | 6.51387498  |
| 81737_at     | NPIPL3   | AI424872  | 23117 Hs.552700, Hs.6  | -1.694763082 | 5.280099879 |
| 235912_at    |          | BE552155  |                        | -1.691760243 | 5.026105519 |
| 237310_at    |          | AI743607  |                        | -1.690836941 | 6.370005181 |
| 215802_at    |          | AK000144  |                        | -1.682369067 | 4.715546557 |
| 1565689_at   |          | BG400570  |                        | -1.680952426 | 5.211456217 |
| 242405_at    |          | BF358386  |                        | -1.680614987 | 5.797690185 |
| 232307_at    |          | AK021554  |                        | -1.67155057  | 5.119570994 |
| 227838_at    |          | AW070250  |                        | 1.667526065  | 7.092993757 |
| 238774_at    |          | AW960454  |                        | -1.656047306 | 5.641757396 |
| 1559491_at   |          | AL390180  |                        | -1.637091221 | 5.986215604 |
| 236355_s_at  |          | AI076172  |                        | -1.636515011 | 5.452618512 |
| 206548_at    |          | NM_024880 |                        | -1.621858313 | 4.752670264 |
| 202772_at    | HMGCL    | NM_000191 | 3155 Hs.533444, Hs.6   | 1.613732346  | 10.46353821 |
| 1560109_s_at | NUB1     | AA193477  | 51667 Hs.647082        | -1.61217186  | 4.427439129 |
| 237456_at    |          | AI655806  |                        | -1.601058632 | 5.552052246 |
| 232000_at    | TTC39B   | AW001030  | 158219 Hs.563630       | 1.594870215  | 6.592156687 |
| 241214_at    |          | AI939471  |                        | -1.594027526 | 6.427490364 |
| 1553151_at   | ATP6V0D2 | AY079172  | 245972 Hs.436360       | 1.593822177  | 6.127799328 |
| 242732_at    |          | BG010493  |                        | -1.591835851 | 5.392188124 |
| 239512_at    | SFRS4    | R05895    | 6429 Hs.469970         | -1.582467727 | 6.288944841 |
| 229281_at    | NPAS3    | N51682    | 64067 Hs.657892        | 1.577868541  | 7.043269326 |
| 215078_at    | SOD2     | AL050388  | 6648 Hs.487046         | -1.570939987 | 8.567688082 |
| 203913_s_at  | HPGD     | AL574184  | 3248 Hs.596913         | 1.567976068  | 6.925410339 |
| 235757_at    |          | AA814006  |                        | -1.567429339 | 5.477107509 |
| 233674_at    |          | AK026286  |                        | -1.544754952 | 6.659942388 |
| 239264_at    |          | AW973078  |                        | -1.534596082 | 5.022928547 |
| 240263_at    |          | N74924    |                        | -1.527998042 | 5.414833397 |
| 232615_at    |          | AA632758  |                        | -1.526607253 | 7.56380803  |
| 222087_at    | PVT1     | AW451806  | 5820 Hs.133107, Hs.6   | -1.520964032 | 6.506095299 |
| 209200_at    | MEF2C    | AL536517  | 4208 Hs.653394         | 1.511102888  | 10.07206684 |
| 234605_at    | CDC14B   | AK024886  | 8555 Hs.40582          | -1.506428939 | 5.25551146  |
| 1559156_at   |          | BC036508  |                        | -1.493012385 | 7.32083969  |
| 242114_at    | BOLA2    | BF088991  | 552900 Hs.444600, Hs.6 | -1.485496393 | 5.842246534 |
| 239414_at    |          | BF942260  |                        | -1.472552963 | 7.416295721 |
| 243088_at    |          | W84667    |                        | -1.462678259 | 6.463625368 |
| 236976_at    | FANCA    | AI569792  | 2175 Hs.719210         | -1.462081352 | 5.850309365 |
| 1568846_at   |          | BC017718  |                        | -1.460480063 | 8.251496935 |
| 235786_at    |          | AI806781  |                        | -1.458479649 | 4.855168606 |
| 1562144_at   |          | AF075103  |                        | -1.456709094 | 4.707724893 |
| 1556672_a_at | RBM6     | AI190489  | 10180 Hs.439480        | -1.447891544 | 7.135064691 |
| 242859_at    |          | BE156563  |                        | -1.446764951 | 6.658800272 |
| 1558714_at   |          | BC043430  |                        | -1.446140631 | 5.239233791 |
| 242886_at    |          | AW007763  |                        | -1.445700255 | 6.777535898 |
| 242143_at    |          | BE674964  |                        | -1.433048473 | 5.196505471 |
| 1557718_at   | PPP2R5C  | AL834350  | 5527 Hs.368264, Hs.7   | -1.426546004 | 5.463246136 |

|              |         |           |                       |              |             |
|--------------|---------|-----------|-----------------------|--------------|-------------|
| 241457_at    |         | AI821935  |                       | -1.425353889 | 5.156465629 |
| 238883_at    |         | AW975051  |                       | -1.421705845 | 5.662421595 |
| 235680_at    |         | AI914925  |                       | -1.421080784 | 5.485447387 |
| 242038_at    | LRRC8B  | BG037106  | 23507 Hs.482017, Hs.6 | -1.415413841 | 5.505180003 |
| 239227_at    |         | AW182675  |                       | -1.413753058 | 5.98710379  |
| 227266_s_at  | FYB     | BF679849  | 2533 Hs.370503        | 1.408725618  | 6.327739611 |
| 1558410_s_at |         | AW974642  |                       | -1.40857607  | 5.886075734 |
| 1569208_a_at |         | BC020895  |                       | -1.408207411 | 5.257810203 |
| 1564886_at   |         | AL359595  |                       | -1.405432263 | 6.67497196  |
| 206408_at    | LRRTM2  | NM_015564 | 26045 Hs.656653       | -1.400483571 | 4.79290933  |
| 239908_at    |         | AA496799  |                       | -1.400434197 | 7.224845963 |
| 243003_at    |         | AV702197  |                       | -1.400193546 | 7.451847543 |
| 1560680_at   |         | AL833513  |                       | -1.391417609 | 6.415653397 |
| 229858_at    |         | AU146893  |                       | -1.391347821 | 6.616081109 |
| 242476_at    |         | AI436356  |                       | -1.389218591 | 5.897007174 |
| 240798_at    |         | BE467916  |                       | -1.384782965 | 4.989657664 |
| 231205_at    |         | BF055351  |                       | -1.377684726 | 5.525099202 |
| 243474_at    |         | W87425    |                       | -1.374184785 | 4.875604885 |
| 235847_at    |         | BF111312  |                       | -1.37376709  | 5.635878127 |
| 234095_at    |         | AU155112  |                       | -1.371839766 | 6.22693389  |
| 228623_at    |         | AI224133  |                       | -1.366709103 | 7.92092966  |
| 238619_at    |         | AA417078  |                       | -1.365610656 | 6.878220062 |
| 228573_at    | ANTXR2  | BE673665  | 118429 Hs.162963      | 1.365158879  | 9.950818451 |
| 210109_at    | C7orf54 | AF191492  | 27099 Hs.657377       | -1.364271879 | 5.85157939  |
| 236216_at    |         | AA598661  |                       | -1.363306066 | 6.151186082 |
| 241932_at    |         | AI073803  |                       | -1.355742401 | 5.365774836 |
| 239348_at    |         | AI285970  |                       | -1.352580885 | 5.746394193 |
| 243149_at    |         | AI467945  |                       | -1.350407784 | 4.716783739 |
| 209199_s_at  | MEF2C   | N22468    | 4208 Hs.653394        | 1.349690435  | 9.634230601 |
| 1567223_at   | HMGA2   | U29113    | 8091 Hs.505924        | -1.34327983  | 5.283316032 |
| 242868_at    |         | T70087    |                       | -1.342577424 | 5.356776997 |
| 231552_at    |         | AW451785  |                       | -1.341249019 | 6.1933929   |
| 240499_at    |         | AA482221  |                       | -1.339816138 | 4.765993075 |
| 202720_at    | TES     | NM_015641 | 26136 Hs.592286, Hs.6 | 1.335902451  | 7.010780215 |
| 1564798_at   |         | AK000811  |                       | -1.332835723 | 4.971195426 |
| 223557_s_at  | TMEFF2  | AB017269  | 23671 Hs.144513       | 1.331031212  | 9.443686909 |
| 241372_at    | ZC3H6   | R34135    | 376940 Hs.190477      | 1.319913899  | 6.21684905  |
| 1558385_at   |         | AL832806  |                       | -1.318738931 | 5.92696848  |
| 244682_at    | CAMSAP1 | H11471    | 157922 Hs.522493      | -1.315917022 | 5.537793623 |
| 1560476_at   |         | AF290476  |                       | -1.315897403 | 5.363632866 |
| 1558569_at   | UNQ6228 | AL832308  | 100131541 Hs.661972   | -1.311239402 | 6.732864364 |
| 206638_at    | HTR2B   | NM_000867 | 3357 Hs.421649        | -1.310845368 | 6.300984803 |
| 239567_at    |         | AW974998  |                       | -1.307590707 | 5.166559629 |
| 238544_at    |         | AA618295  |                       | -1.305567618 | 5.270044868 |
| 239519_at    |         | AA927670  |                       | -1.305373616 | 6.949290327 |
| 240156_at    |         | AA417099  |                       | -1.295776483 | 4.913869577 |
| 242688_at    |         | AI149880  |                       | -1.294211695 | 8.189253645 |
| 236947_at    |         | AI686664  |                       | -1.287292079 | 5.387679882 |
| 1569538_at   |         | AF130084  |                       | -1.287115    | 5.635878127 |
| 235804_at    |         | T86613    |                       | -1.287115    | 5.961730608 |

|              |           |           |                       |              |             |
|--------------|-----------|-----------|-----------------------|--------------|-------------|
| 242983_at    |           | AI806626  |                       | -1.284876621 | 6.055331801 |
| 222145_at    |           | AK027225  |                       | -1.282472469 | 4.936361761 |
| 234159_at    |           | AK025182  |                       | -1.280392834 | 6.1933929   |
| 242126_at    |           | T53962    |                       | -1.279693914 | 5.073080785 |
| 239274_at    |           | AV729557  |                       | -1.276573674 | 5.289077341 |
| 244473_at    |           | R37637    |                       | -1.274649646 | 6.19136422  |
| 242240_at    |           | AI805700  |                       | -1.27052649  | 7.981482171 |
| 1554213_at   | ARHGEF10  | BC036809  | 9639 Hs.98594         | -1.269774342 | 6.235483101 |
| 1555074_a_at | KCNH5     | BC043409  | 27133 Hs.27043        | -1.268741856 | 5.152148854 |
| 230590_at    |           | BE675486  |                       | -1.256709358 | 6.36043427  |
| 220969_s_at  |           | NM_030892 |                       | -1.255823081 | 5.873399357 |
| 242068_at    |           | AA608834  |                       | -1.255091279 | 6.334370986 |
| 243670_at    |           | BE670161  |                       | -1.254393993 | 6.298453529 |
| 219210_s_at  | RAB8B     | NM_016530 | 51762 Hs.389733       | 1.252531426  | 8.896902106 |
| 1557539_at   |           | BC008052  |                       | -1.249058254 | 5.257753161 |
| 243827_at    |           | AL038125  |                       | -1.246508175 | 5.090613928 |
| 228885_at    | MAMDC2    | AI862120  | 256691 Hs.547172      | 1.244099341  | 7.938658868 |
| 222180_at    |           | AU147889  |                       | -1.2424408   | 4.878445785 |
| 231199_at    |           | AA701676  |                       | -1.239247755 | 4.97295984  |
| 217482_at    |           | AK021987  |                       | -1.239191413 | 6.746678136 |
| 241681_at    |           | AW296451  |                       | -1.237660534 | 8.523250339 |
| 241797_at    |           | AI904095  |                       | -1.233064386 | 5.574602342 |
| 242492_at    | CLNS1A    | AA412065  | 1207 Hs.430733, Hs.5! | -1.230846072 | 6.81827937  |
| 227443_at    | C9orf150  | AI972386  | 286343 Hs.445356      | 1.230363171  | 9.490543805 |
| 232002_at    |           | AW843302  |                       | -1.227981951 | 7.165781121 |
| 213606_s_at  | ARHGDI A  | AI571798  | 396 Hs.159161         | -1.227016296 | 7.92480366  |
| 239957_at    |           | AW510793  |                       | -1.226766046 | 5.674927094 |
| 1562059_at   |           | AW020871  |                       | -1.223453938 | 4.989517584 |
| 212070_at    | GPR56     | AL554008  | 9289 Hs.513633        | 1.223395523  | 9.650393353 |
| 207746_at    | POLQ      | NM_014125 | 10721 Hs.241517       | -1.22320161  | 5.035558454 |
| 231223_at    | CSMD1     | R41565    | 64478 Hs.571466       | 1.222024021  | 10.21594423 |
| 238563_at    |           | AV762916  |                       | -1.220644296 | 5.629190794 |
| 215318_at    | CG012     | AL049782  | 116829 Hs.687692      | -1.218691805 | 5.088582525 |
| 232835_at    |           | AA533080  |                       | -1.216728418 | 6.538249517 |
| 1558599_at   |           | AA532745  |                       | -1.216018231 | 4.930059765 |
| 229013_at    | LOC145783 | BF111029  | 145783 Hs.620525      | 1.210304432  | 6.928918182 |
| 234224_at    |           | AL137541  |                       | -1.209278201 | 5.029854733 |
| 239238_at    |           | AI208857  |                       | -1.209129626 | 6.872820177 |
| 240787_at    |           | AW449433  |                       | -1.209108521 | 5.429919799 |
| 238172_at    |           | AA192765  |                       | -1.205867076 | 6.452511679 |
| 239448_at    |           | AI475033  |                       | -1.204860943 | 5.958505685 |
| 1569664_at   |           | BC035915  |                       | -1.204625094 | 5.889268693 |
| 241762_at    | FBXO32    | BF244402  | 114907 Hs.403933      | -1.201540977 | 5.216605613 |
| 214215_s_at  | LARP4B    | AW514174  | 23185 Hs.681734, Hs.7 | -1.201398131 | 5.011255105 |
| 241320_at    |           | AI821449  |                       | -1.19843653  | 6.438203212 |
| 1557597_at   |           | BC036212  |                       | -1.197701235 | 5.270676936 |
| 241301_at    |           | AA694187  |                       | -1.194646051 | 5.847261909 |
| 225345_s_at  |           | AU155376  |                       | -1.191962436 | 7.13975899  |
| 239469_at    |           | BF513404  |                       | -1.191351279 | 6.084684925 |
| 1552829_at   |           | NM_018505 |                       | -1.186675757 | 5.871886366 |

|             |           |           |                  |              |             |
|-------------|-----------|-----------|------------------|--------------|-------------|
| 239923_at   |           | AI056872  |                  | -1.185689302 | 5.263571335 |
| 232465_at   |           | AK021749  |                  | -1.184736202 | 5.814342576 |
| 215979_s_at | SLC7A1    | AK022999  | 6541 Hs.14846    | -1.179773588 | 7.40288594  |
| 240302_at   |           | AW450681  |                  | -1.176980078 | 5.624145396 |
| 232134_at   |           | AW139789  |                  | -1.173025017 | 8.52800424  |
| 1570108_at  |           | BC037848  |                  | -1.167714757 | 6.111813249 |
| 230099_at   |           | AI139993  |                  | -1.16735959  | 5.646997613 |
| 213556_at   | LOC390940 | BE673445  | 390940 Hs.22049  | 1.165040076  | 8.365901634 |
| 232711_at   |           | AU146197  |                  | -1.163456902 | 7.171100511 |
| 239606_at   |           | AA669135  |                  | -1.161466094 | 6.667950381 |
| 242343_x_at |           | H57111    |                  | -1.161073721 | 6.334415364 |
| 232592_at   |           | AU146731  |                  | -1.160449332 | 6.553674955 |
| 231343_at   |           | AW300131  |                  | 1.157345144  | 9.058293683 |
| 232778_at   |           | AK026036  |                  | -1.157341022 | 6.426497012 |
| 244457_at   |           | BF724206  |                  | -1.157010166 | 5.497985021 |
| 231950_at   | ZNF658    | AW874634  | 26149 Hs.522147  | 1.154698581  | 6.332787832 |
| 1566079_at  | RPS16P5   | AL833001  | 647190 Hs.675022 | -1.154158212 | 5.740014468 |
| 235454_at   |           | AI436561  |                  | -1.154153809 | 5.997101564 |
| 238438_at   | CNOT6L    | R67226    | 246175 Hs.592519 | -1.148244828 | 4.950103549 |
| 222453_at   | CYBRD1    | AL136693  | 79901 Hs.715531  | -1.146416232 | 8.898566249 |
| 1570329_at  |           | BC014497  |                  | -1.145979865 | 5.440914832 |
| 220941_s_at | C21orf91  | NM_017447 | 54149 Hs.293811  | 1.144823601  | 9.391385285 |
| 240247_at   |           | AI653240  |                  | -1.141014777 | 7.761099423 |
| 222282_at   |           | AV761453  |                  | -1.140469185 | 7.165076325 |
| 205933_at   | SETBP1    | NM_015559 | 26040 Hs.435458  | 1.137791562  | 8.388530219 |
| 244347_at   |           | BE825318  |                  | -1.130701943 | 6.342499118 |
| 240008_at   |           | AI955765  |                  | -1.12656662  | 5.436576671 |
| 1560926_at  |           | AF085924  |                  | -1.126257237 | 7.358212315 |
| 239757_at   | ZFAND6    | AA741493  | 54469 Hs.719106  | -1.125568584 | 5.935947012 |
| 240257_at   | SYNJ2     | AI971212  | 8871 Hs.434494   | -1.124140779 | 6.128558185 |
| 241893_at   |           | BE927766  |                  | -1.123412459 | 5.081078414 |
| 233315_at   |           | AK024947  |                  | -1.123186393 | 5.934117093 |
| 243768_at   |           | AA026388  |                  | -1.122398537 | 7.346260473 |
| 201775_s_at | KIAA0494  | AA676790  | 9813 Hs.719205   | -1.120432801 | 8.679352994 |
| 244356_at   |           | AL079909  |                  | -1.11896753  | 7.54442516  |
| 237377_at   |           | AA069425  |                  | -1.11873928  | 4.94904123  |
| 236346_at   |           | BF115793  |                  | -1.118574924 | 7.480749926 |
| 233921_s_at |           | AK022078  |                  | -1.118204719 | 7.089373219 |
| 236595_at   |           | AA776458  |                  | -1.117894154 | 6.201153958 |
| 1569477_at  |           | BC025999  |                  | -1.116530721 | 6.40072714  |
| 1567224_at  | HMGA2     | U29113    | 8091 Hs.505924   | -1.115914833 | 4.921529594 |
| 220410_s_at | CAMSAP1   | NM_018627 | 157922 Hs.522493 | -1.115500301 | 6.264168824 |
| 238706_at   | PAPD4     | BG168850  | 167153 Hs.418198 | -1.114722037 | 5.152322974 |
| 240248_at   |           | AA778783  |                  | -1.11255464  | 6.328362658 |
| 243589_at   | KIAA1267  | AI823453  | 284058 Hs.648744 | -1.11165161  | 6.383715285 |
| 228484_s_at | FOXO1     | AI472322  | 2308 Hs.370666   | -1.111237419 | 6.837802011 |
| 227478_at   | SETBP1    | BF739885  | 26040 Hs.435458  | 1.110884956  | 8.985904131 |
| 242449_at   |           | BG054682  |                  | -1.106983063 | 5.823983663 |
| 1555854_at  |           | AA594609  |                  | -1.10647736  | 8.971570236 |
| 244358_at   |           | AW372457  |                  | -1.105973871 | 7.742020115 |

|              |           |           |                        |               |             |
|--------------|-----------|-----------|------------------------|---------------|-------------|
| 244633_at    |           | AA404996  |                        | -1.105410517  | 5.918017712 |
| 239892_at    |           | AW593666  |                        | -1.104384516  | 6.780422129 |
| 1556240_at   |           | AI339498  |                        | -1.103723408  | 5.218451371 |
| 233800_at    |           | AA805082  |                        | -1.102331772  | 5.4661987   |
| 239597_at    |           | AA993566  |                        | -1.10086361   | 5.862675207 |
| 231106_at    | BMS1P5    | AI684591  | 399761 Hs.314437, Hs.7 | -1.099573124  | 6.128646334 |
| 1560026_at   |           | BC037944  |                        | -1.099214705  | 5.524458657 |
| 235784_at    |           | N32155    |                        | -1.099021374  | 6.815068602 |
| 1554828_at   | PDGFRA    | BC015186  | 5156 Hs.74615          | -1.097961856  | 5.07584475  |
| 214622_at    | CYP21A2   | M17252    | 1589 Hs.654479         | 1.097573344   | 7.606492748 |
| 232889_at    |           | AU147591  |                        | -1.0944440258 | 8.367109828 |
| 238303_at    | STT3B     | AW070371  | 201595 Hs.475812       | -1.09326906   | 7.335209153 |
| 1569540_at   |           | BC035958  |                        | -1.09101066   | 5.527228838 |
| 232281_at    | LOC148189 | AU147637  | 148189 Hs.565253       | -1.090717795  | 6.539560384 |
| 209713_s_at  | SLC35D1   | AB044343  | 23169 Hs.213642        | 1.089211267   | 7.960559402 |
| 232500_at    | C20orf74  | AL121896  | 57186 Hs.472285        | -1.088781113  | 6.278219266 |
| 235138_at    |           | AA565051  |                        | -1.088354664  | 7.37290495  |
| 1559992_a_at |           | BC042069  |                        | -1.087822606  | 4.992877668 |
| 228271_at    |           | AW001186  |                        | -1.087548533  | 7.228388535 |
| 1563452_at   | AVL9      | AL833560  | 23080 Hs.128056        | -1.084069576  | 5.061672855 |
| 233323_at    |           | AK024973  |                        | -1.081675985  | 5.204730023 |
| 202838_at    | FUCA1     | NM_000147 | 2517 Hs.370858         | 1.080706693   | 9.673504857 |
| 241865_at    |           | AI056689  |                        | -1.07911165   | 6.740928354 |
| 210637_at    | TACR1     | M81797    | 6869 Hs.633301         | -1.078466665  | 5.443308037 |
| 243482_at    |           | BF512299  |                        | -1.077411778  | 5.309752677 |
| 234649_at    |           | AK026259  |                        | -1.077154157  | 4.947223404 |
| 242875_at    |           | AI659439  |                        | -1.076554358  | 7.470377338 |
| 241407_at    |           | BF032023  |                        | -1.076173685  | 6.007137318 |
| 1565713_at   |           | H72951    |                        | -1.075618195  | 5.217040913 |
| 236696_at    | SR140     | BE464843  | 23350 Hs.596572        | -1.069780555  | 6.637092874 |
| 230918_at    |           | BE856598  |                        | -1.067735875  | 6.739979575 |
| 215515_at    |           | AL049268  |                        | -1.062647046  | 7.576129448 |
| 235601_at    |           | AA907029  |                        | -1.062162695  | 5.821844346 |
| 243395_at    |           | AI679555  |                        | 1.060955688   | 9.399955457 |
| 241063_at    |           | BE672556  |                        | -1.060951877  | 6.49910409  |
| 243527_at    |           | AW793677  |                        | -1.059246806  | 5.788112868 |
| 236379_at    |           | AW771958  |                        | -1.058565357  | 6.423163344 |
| 1555675_at   | BLID      | AF303179  | 414899 Hs.686109       | -1.057171542  | 5.073032237 |
| 241965_at    |           | BF589232  |                        | -1.056787238  | 6.639115245 |
| 215378_at    |           | AU148255  |                        | -1.056655965  | 5.705184166 |
| 1558836_at   |           | BQ024490  |                        | -1.056489458  | 7.582355504 |
| 217626_at    |           | BF508244  |                        | -1.056095154  | 8.923111189 |
| 205239_at    | AREG      | NM_001657 | 374 Hs.270833          | 1.05547072    | 9.554607766 |
| 243286_at    |           | AA682674  |                        | -1.055338195  | 6.875364372 |
| 222368_at    |           | AW972351  |                        | -1.054444063  | 5.297647502 |
| 233370_at    |           | AK024973  |                        | -1.053118124  | 5.171562034 |
| 242021_at    |           | AI091255  |                        | -1.052613818  | 5.769086337 |
| 237895_at    |           | AV700930  |                        | -1.052605949  | 6.476131211 |
| 220609_at    | LOC202181 | NM_024651 | 202181 Hs.189914, Hs.6 | -1.052409727  | 5.257186839 |
| 236752_at    |           | AA913146  |                        | -1.051635541  | 5.027329914 |

|              |              |           |           |                  |              |             |
|--------------|--------------|-----------|-----------|------------------|--------------|-------------|
| 1558837_a_at |              | BQ024490  |           |                  | -1.050473399 | 7.441032706 |
| 239630_at    |              | BF516583  |           |                  | -1.050146003 | 5.516080915 |
| 201167_x_at  | ARHGDI A     | D13989    | 396       | Hs.159161        | -1.049566499 | 7.617389457 |
| 223710_at    | CCL26        | AF096296  | 10344     | Hs.131342        | 1.049271014  | 6.611049262 |
| 216847_at    |              | AB051447  |           |                  | -1.04908491  | 4.986806215 |
| 1557828_a_at | C5orf28      | BE675061  | 64417     | Hs.558531        | -1.047886644 | 5.563789785 |
| 225801_at    | FBXO32       | AW518714  | 114907    | Hs.403933        | -1.047126365 | 5.798112476 |
| 243841_at    | SYNE2        | BE673396  | 23224     | Hs.525392        | -1.046810874 | 10.09210527 |
| 243329_at    |              | AI074450  |           |                  | -1.04655799  | 6.500843641 |
| 1559410_at   |              | AA524609  |           |                  | -1.046482241 | 5.384646157 |
| 1557996_at   |              | AK091784  |           |                  | -1.046314684 | 7.399971766 |
| 1552536_at   | VTI1A        | NM_145206 | 143187    | Hs.194554        | -1.042793203 | 6.758803124 |
| 212143_s_at  | IGFBP3       | BF340228  | 3486      | Hs.450230, Hs.61 | -1.042516351 | 5.815905056 |
| 243559_at    |              | BF515306  |           |                  | -1.040851554 | 5.496492616 |
| 227939_s_at  | TRA2A        | BF439171  | 29896     | Hs.445652        | -1.038935183 | 5.352514263 |
| 212076_at    | MLL          | AI701430  | 4297      | Hs.258855        | -1.03715665  | 9.788740418 |
| 233219_at    |              | AK023427  |           |                  | -1.036099006 | 5.714257651 |
| 237184_at    |              | BF110186  |           |                  | -1.034797842 | 5.938815807 |
| 241595_at    |              | BF223007  |           |                  | -1.033654804 | 6.775580803 |
| 217638_at    |              | BF939092  |           |                  | -1.033158346 | 6.094608551 |
| 242664_at    |              | AI040744  |           |                  | -1.0329518   | 5.412996668 |
| 229808_at    | CHAF1A       | AI344306  | 10036     | Hs.79018         | -1.032934867 | 7.274698443 |
| 231005_at    |              | T91195    |           |                  | -1.030972465 | 6.098992129 |
| 213605_s_at  | LOC100272216 | AL049987  | 100272216 | Hs.631974        | -1.030385611 | 9.580915537 |
| 231544_s_at  | POLR3G       | AV648405  | 10622     | Hs.282387        | -1.029960007 | 5.584176836 |
| 230702_at    | C8orf16      | BE674736  | 83735     | Hs.660259        | -1.02951356  | 6.257649091 |
| 229834_at    | NFIX         | AI937201  | 4784      | Hs.257970        | -1.028209581 | 6.912137531 |
| 235112_at    |              | AA088388  |           |                  | -1.026538514 | 6.363037667 |
| 219501_at    | ENOX1        | NM_017993 | 55068     | Hs.128258, Hs.7  | 1.026430872  | 8.948223268 |
| 218486_at    | KLF11        | AA149594  | 8462      | Hs.12229, Hs.69  | -1.02620654  | 7.110302357 |
| 232148_at    | NSMAF        | BF056507  | 8439      | Hs.372000        | -1.024429516 | 5.969213986 |
| 1554785_at   | CCDC82       | BC018663  | 79780     | Hs.525088        | 1.023811456  | 6.069041709 |
| 232372_at    |              | AL157491  |           |                  | -1.022407576 | 5.764431944 |
| 1565558_at   |              | N67305    |           |                  | -1.022063255 | 5.037170363 |
| 244019_at    |              | T89845    |           |                  | -1.015269514 | 5.220730327 |
| 237502_at    | CRLS1        | BE671045  | 54675     | Hs.224764        | -1.014219094 | 6.167475831 |
| 1560082_at   |              | AL833239  |           |                  | -1.014115425 | 5.13915711  |
| 220310_at    | TUBAL3       | NM_024803 | 79861     | Hs.163079        | 1.011679041  | 8.235933284 |
| 220858_at    | SORBS2       | NM_014133 | 8470      | Hs.619806, Hs.61 | -1.011317623 | 5.215137877 |
| 222846_at    | RAB8B        | AB038995  | 51762     | Hs.389733        | 1.010417137  | 7.554947032 |
| 1554588_a_at | TTC30B       | BC033795  | 150737    | Hs.447659        | 1.010100207  | 6.291711915 |
| 215470_at    |              | U21915    |           |                  | -1.00960035  | 9.312242902 |
| 233877_at    |              | AK000777  |           |                  | -1.006572539 | 5.019124044 |
| 226109_at    | C21orf91     | AK023825  | 54149     | Hs.293811        | 1.006531654  | 10.31118602 |
| 231958_at    | C3orf31      | AW969235  | 132001    | Hs.475472        | -1.005823345 | 5.669148615 |
| 239731_at    |              | AI674685  |           |                  | -1.005226297 | 8.011383443 |
| 239735_at    |              | N67106    |           |                  | -1.0034803   | 6.076279083 |
| 233227_at    | KIAA1109     | AB037792  | 84162     | Hs.408142        | -1.003225191 | 6.539549407 |
| 233037_at    |              | AF138859  |           |                  | -1.001796171 | 5.57583725  |
| 236006_s_at  | AKAP10       | AU147278  | 11216     | Hs.708043        | -1.001690832 | 5.318559463 |

|             |        |           |                      |              |             |
|-------------|--------|-----------|----------------------|--------------|-------------|
| 233238_s_at |        | AK001582  |                      | 1.001598584  | 8.134957044 |
| 204055_s_at | CTAGE5 | NM_005930 | 4253 Hs.509200, Hs.5 | -1.001237097 | 5.254109485 |
| 242440_at   |        | N52821    |                      | -1.000774854 | 5.221711764 |
| 1558078_at  |        | BQ219651  |                      | -1.000023063 | 5.977879986 |



CTRL ALDH-

5.96672174  
6.57763342  
6.04521447  
6.58604278  
5.12570075  
7.45175056  
3.96527941  
6.48959141  
7.28725976  
6.96401588  
7.11843154  
3.96827404  
7.01845859  
7.40401338  
7.23212593  
7.69894842  
7.79012712  
6.43117906  
6.55759016  
7.85029337  
7.89610052  
8.93042248  
6.77421437  
6.60101218  
7.25610315  
6.53535703  
8.97951605  
7.40477031  
7.27746926  
7.48065467  
6.69230818  
6.63212641  
7.48883633  
5.37471947  
5.71877391  
6.37763444  
6.09319661  
7.74268135  
7.39726437  
8.88362924  
6.86175516  
6.97924471  
6.24699966  
5.99400616  
7.1287506  
7.59720034  
6.47052358  
7.63430434

5.69395487  
6.10451461  
6.83882494  
6.84983509  
4.81453851  
6.97486296  
6.71786576  
8.06084212  
6.39791562  
6.89240864  
7.47830517  
6.79112156  
5.42546769  
7.2978047  
7.62330682  
7.08913352  
6.37452858  
8.84980586  
6.03961099  
7.15311088  
4.99728647  
8.02151789  
4.53397715  
6.98402397  
7.87141257  
5.46540079  
10.1386281  
5.35743427  
7.04453685  
8.20469734  
6.55752463  
6.94283144  
9.09041528  
8.02705933  
8.56096395  
6.7619404  
8.81385207  
7.32774293  
8.88884868  
7.92630363  
7.31239072  
9.711977  
6.31364826  
6.16443399  
8.58295623  
8.10556522  
6.68537442  
8.22323615  
6.62955394  
6.88979214

6.58181952  
7.08412744  
6.90652817  
6.92059384  
7.40085685  
4.91901399  
7.2946518  
6.66601761  
8.08040422  
6.1933929  
8.62528016  
8.85204109  
7.80707101  
8.00742893  
7.28622577  
6.37444063  
6.90278393  
6.24978967  
7.00964522  
7.59877366  
9.28763876  
8.24383072  
8.58565957  
7.21585127  
7.51449215  
6.72151724  
7.09897508  
6.06719152  
8.28454017  
6.62659586  
6.69935442  
7.53464192  
6.10580921  
5.67487776  
6.30403115  
8.1126557  
4.89693515  
7.24570741  
6.85371065  
6.67953027  
8.04410377  
7.61183017  
6.47415034  
6.57561249  
8.25466394  
6.20964606  
9.48346534  
6.67497196  
6.92299313  
7.24884561

7.34020842  
6.21883423  
7.47378573  
6.3527747  
6.56565101  
7.46601387  
9.25200866  
7.50525744  
6.42089071  
7.61714363  
7.12922244  
7.58946227  
7.55284752  
7.64437068  
6.50681142  
6.3371221  
6.69455953  
6.12088658  
6.2122076  
7.98586955  
9.76091087  
6.80766673  
8.04912544  
8.26018063  
8.39376307  
9.15181996  
6.90169314  
6.21297152  
8.42699783  
6.25876006  
8.99392021  
6.84983509  
6.30727433  
7.75497794  
6.146078  
5.71861375  
6.23913293  
8.0819498  
6.63902832  
7.65837875  
7.16336663  
7.09389379  
6.41814659  
6.21265324  
7.63663974  
6.46837817  
7.04190796  
8.33172143  
7.2760362  
7.05856212

6.44926064  
6.99907878  
8.58265953  
6.80112547  
9.70102926  
7.27952801  
6.8143572  
7.20086156  
8.33455741  
7.82941648  
7.49548909  
7.71412429  
7.90094854  
7.58383803  
6.65499519  
5.17808925  
6.89417268  
7.15125537  
6.09834838  
10.0449825  
6.5868947  
8.24656168  
8.9021142  
8.30554551  
7.25073866  
7.47320106  
6.56314329  
8.48446955  
7.0615156  
7.25269896  
6.20449087  
7.05730349  
8.46865901  
9.79978579  
8.66339269  
6.06778051  
8.59932485  
8.20757794  
7.31904811  
7.51725786  
6.03744443  
7.37966913  
6.26704501  
7.4409173  
7.49536689  
7.94903943  
7.87501918  
6.93096673  
10.0780476  
8.84799399

7.02342823  
7.88480665  
6.32217478  
6.56853047  
6.96353882  
7.22821946  
6.62367336  
7.91408998  
6.17380661  
6.5089194  
9.46155009  
8.42847821  
6.6182395  
7.63027818  
6.87134813  
7.36700038  
8.46125961  
6.08070027  
8.31593707  
6.14574243  
6.28640601  
8.59279816  
7.82004485  
6.5217747  
6.38716446  
6.02437756  
8.5469317  
7.083311  
6.29265911  
7.70687343  
7.80771545  
8.63877649  
6.88400704  
8.33899977  
7.56005597  
6.84735967  
7.4817287  
6.13020378  
7.69590248  
6.76184013  
8.63884496  
9.97920634  
8.49913705  
7.93070257  
6.35208813  
6.22468016  
6.82170015  
7.52873716  
6.30959657  
6.07896545

8.4915061  
6.56622692  
8.66695596  
5.56177825  
6.03589113  
6.61167643  
6.84523884  
11.1389161  
7.54740163  
6.4311284  
8.44628645  
7.80159633  
6.85842141  
6.53734417  
6.39144945  
10.8258971  
6.75035666  
6.97361365  
7.80923561  
7.1277669  
6.44594847  
8.30763331  
7.12996459  
10.6113011  
6.61413684  
7.28716265  
7.94034711  
7.38957618  
7.9217924  
8.1365089  
6.9936435  
5.04523025  
6.78683952  
6.05923362  
6.23599984  
7.18169493  
6.15327253  
7.22425424  
6.2264555  
6.54452989  
5.28161171  
10.3218433  
6.02569658  
9.30465436  
6.67497196  
9.01660974  
7.07975938  
7.5427746  
6.57763342  
6.32025029

7.13335846  
6.25534658  
6.22248662  
6.97790305
