# Supplementary material for: MicroRNA93 Regulates Proliferation and Differentiation of Normal and Malignant Breast Stem Cells
Source: PLoS Genet. 2012 Jun 7;8(6):e1002751. doi: 10.1371/journal.pgen.1002751 (PMC3369932; doi:10.1371/journal.pgen.1002751)
Supplement: Table S2 — mir93 direct targets in SUM159 cells. Overlap between mir93 predicted targets from TargetScan 5.1 and profiling data from DOX-treated cells (DOX) to non-DOX-treated cells (CTRL) in the ALDH− population (12 genes) or in the ALDH+ population (352 genes). Known stem cell regulatory genes highlighted in red. Genes underlined and bolded were analyzed utilizing the luciferase reporter assay. (PDF) [file pgen.1002751.s027.pdf]

| SUM159-mir93                                                                                      |                                                                                                                                                                                                                                                                                                                                                                                                                                                                                                                                                                                                                                                                                                                                                                                                                                                                                                                                                                                                                                                                                                                                                                                                                                                                                                                                                |
|---------------------------------------------------------------------------------------------------|------------------------------------------------------------------------------------------------------------------------------------------------------------------------------------------------------------------------------------------------------------------------------------------------------------------------------------------------------------------------------------------------------------------------------------------------------------------------------------------------------------------------------------------------------------------------------------------------------------------------------------------------------------------------------------------------------------------------------------------------------------------------------------------------------------------------------------------------------------------------------------------------------------------------------------------------------------------------------------------------------------------------------------------------------------------------------------------------------------------------------------------------------------------------------------------------------------------------------------------------------------------------------------------------------------------------------------------------|
| ALDH- (DOX vs CTRL)                                                                               | ALDH+ (DOX vs CTRL)                                                                                                                                                                                                                                                                                                                                                                                                                                                                                                                                                                                                                                                                                                                                                                                                                                                                                                                                                                                                                                                                                                                                                                                                                                                                                                                            |
| ARHGEF10, PDGFRA, HMGA2,<br>KIAA0494, POLQ, KLF11, RAB8B,<br>NPAS3, CHAF1A, POLR3G, SR140, CNOT6L | <b>STAT3</b> , JAK1, CCND1, ITCH, EZH1, <b>AKT3</b> , <b>SOX4</b> ,<br><b>HMGA2</b> , BCL2L11, RBL1, TXNIP, SKI, RPS6KA5, HLF,<br>NCOA3, BMPR2, RB1, NPAT, RBL2, TCF4, PKN2,<br><b>CSNK1G1</b> , <b>E2F2</b> , THRA, DIP2A, FAM126B, ARHGEF10,<br>EPB41, EPHA7, TACC1, LPGAT1, AFF4, CAPRIN2,<br>LUZP1, AHNAK, ACBD5, LAMA3, MKL2, SPTBN1, CALD1,<br>FXR1, KIAA0494, RYBP, TBL1X, FURIN, GRLF1, MECP2,<br>PLAGL2, RAPGEF2, SRPK2, ZNF148, CEP57, CHAF1A,<br>RAPGEF1, GOSR1, EEA1, MPDZ, SEMA5A, ZNF264,<br>EPHA4, ELK3, POLR3G, MXD1, NKX3-2, SLC4A7,<br>NFAT5, RUNX1, TANC2, PDE3B, BICD2, KLHL20,<br>TRIP11, RNF6, LYST, SLC9A2, NCOA3, NFIB, PDLIM5,<br>AFF1, DYNC1LI2, TMCC1, PTPRD, SKI, DCBLD2, TWF1,<br>ARID4B, NHLH1, ZBTB33, MGEA5, NFAT5, CALD1, LYST,<br>AFF1, TSC22D2, RAPGEF2, SIRPA, MLL4, FAM129A,<br>UBE2W, FNDC3B, VANG1, TMEM50B, ZBTB44, ZNF532,<br>UNKL, LIMA1, TNKS2, TMEM50B, ARID4B, MYLIP,<br>MAPK1, ZFP91, ANKIB1, BTBD7, C5orf41, ARHGAP26,<br>ZFP91, ZNF800, IRF2BP2, PLEKHA3, FMNL3, MYLIP,<br>SPTBN1, NPAS3, MAT2B, CHAF1A, CDCA7, PKN2,<br>TNRC6B, BMPR2, GLT8D3, CREB5, AFF4, MLL3,<br>MAP3K2, REEP3, ITCH, RAB12, MKLN1, ATAD2, AHNAK,<br>CHD9, MAP3K8, KLHL28, MLL3, RAB12, SR140,<br>TNRC6B, DUSP8, OTUD4, AHNAK, KLF12, FNDC3A,<br>SLC30A7, ZFYVE16, LASS6, FGD4, JUB, AFF4, TNRC6A,<br>USP32, ABHD2, MEX3D |
